# Supplementary material for: Exosomes from Adipose Stem Cells Promote Diabetic Wound Healing through the eHSP90/LRP1/AKT Axis
Source: Cells. 2022 Oct 14;11(20):3229. doi: 10.3390/cells11203229 (PMC9600018; doi:10.3390/cells11203229)
Supplement: Supplementary file 1 [file cells-11-03229-s001.zip › Supplementary table S2 Protein Report.xlsx]

## Sheet: protein report
Protein Group	Protein ID	Accession	-10lgP	Coverage (%)	#Peptides	#Unique	PTM	Avg. Mass	Description
1	2	sp|P12111|CO6A3_HUMAN	350.9	55	158	155	Carbamidomethylation; Deamidation (NQ); Oxidation (M); Phosphorylation (STY)	343668	Collagen alpha-3(VI) chain OS=Homo sapiens GN=COL6A3 PE=1 SV=5
2	4	sp|P02751|FINC_HUMAN	284.37	44	72	70	Carbamidomethylation; Deamidation (NQ); Oxidation (M); Phosphorylation (STY)	262622	Fibronectin OS=Homo sapiens GN=FN1 PE=1 SV=4
27	22	sp|P98160|PGBM_HUMAN	221.89	18	54	50	Carbamidomethylation; Deamidation (NQ); Phosphorylation (STY)	468835	Basement membrane-specific heparan sulfate proteoglycan core protein OS=Homo sapiens GN=HSPG2 PE=1 SV=4
4	3	sp|P15144|AMPN_HUMAN	260.57	51	49	49	Carbamidomethylation; Deamidation (NQ); Oxidation (M); Phosphorylation (STY)	109539	Aminopeptidase N OS=Homo sapiens GN=ANPEP PE=1 SV=4
3	10	sp|P04264|K2C1_HUMAN	244.74	60	48	37	Carbamidomethylation; Deamidation (NQ); Oxidation (M); Phosphorylation (STY)	66039	Keratin type II cytoskeletal 1 OS=Homo sapiens GN=KRT1 PE=1 SV=6
23	21	sp|Q9NZM1|MYOF_HUMAN	213.11	28	45	45	Carbamidomethylation; Deamidation (NQ); Phosphorylation (STY)	234706	Myoferlin OS=Homo sapiens GN=MYOF PE=1 SV=1
7	6	sp|Q14764|MVP_HUMAN	242.9	54	40	40	Carbamidomethylation; Deamidation (NQ); Oxidation (M)	99327	Major vault protein OS=Homo sapiens GN=MVP PE=1 SV=4
5	8	sp|P13645|K1C10_HUMAN	237.12	53	39	32	Carbamidomethylation; Deamidation (NQ); Oxidation (M); Phosphorylation (STY)	58827	Keratin type I cytoskeletal 10 OS=Homo sapiens GN=KRT10 PE=1 SV=6
6	5	sp|P12109|CO6A1_HUMAN	238.04	45	36	36	Carbamidomethylation; Deamidation (NQ); Oxidation (M)	108529	Collagen alpha-1(VI) chain OS=Homo sapiens GN=COL6A1 PE=1 SV=3
9	9	sp|P08473|NEP_HUMAN	230.72	51	35	33	Carbamidomethylation; Deamidation (NQ); Oxidation (M)	85514	Neprilysin OS=Homo sapiens GN=MME PE=1 SV=2
75	30	sp|Q07954|LRP1_HUMAN	189.32	9	33	30	Carbamidomethylation; Deamidation (NQ)	504610	Prolow-density lipoprotein receptor-related protein 1 OS=Homo sapiens GN=LRP1 PE=1 SV=2
12	23	sp|P35908|K22E_HUMAN	205.13	52	33	23	Deamidation (NQ); Oxidation (M)	65433	Keratin type II cytoskeletal 2 epidermal OS=Homo sapiens GN=KRT2 PE=1 SV=2
14	13	sp|P08133|ANXA6_HUMAN	223.72	59	32	31	Carbamidomethylation; Deamidation (NQ); Oxidation (M)	75873	Annexin A6 OS=Homo sapiens GN=ANXA6 PE=1 SV=3
37	31	sp|P21333|FLNA_HUMAN	188.08	17	32	29	Carbamidomethylation; Deamidation (NQ); Phosphorylation (STY)	280737	Filamin-A OS=Homo sapiens GN=FLNA PE=1 SV=4
51	18	sp|Q16363|LAMA4_HUMAN	197.19	25	31	30	Carbamidomethylation; Deamidation (NQ)	202523	Laminin subunit alpha-4 OS=Homo sapiens GN=LAMA4 PE=1 SV=4
76	28	sp|P24821|TENA_HUMAN	189.94	21	31	29	Deamidation (NQ); Oxidation (M); Phosphorylation (STY)	240851	Tenascin OS=Homo sapiens GN=TNC PE=1 SV=3
19	44	sp|P01023|A2MG_HUMAN	176.16	24	30	23	Carbamidomethylation; Deamidation (NQ); Oxidation (M)	163290	Alpha-2-macroglobulin OS=Homo sapiens GN=A2M PE=1 SV=3
28	11	sp|Q12884|SEPR_HUMAN	213.62	46	29	29	Carbamidomethylation; Deamidation (NQ); Oxidation (M)	87713	Prolyl endopeptidase FAP OS=Homo sapiens GN=FAP PE=1 SV=5
25	20	sp|P21589|5NTD_HUMAN	208.54	55	29	28	Carbamidomethylation; Deamidation (NQ); Oxidation (M); Phosphorylation (STY)	63368	5'-nucleotidase OS=Homo sapiens GN=NT5E PE=1 SV=1
11	14	sp|P35527|K1C9_HUMAN	210.59	51	28	28	Carbamidomethylation; Deamidation (NQ); Oxidation (M)	62064	Keratin type I cytoskeletal 9 OS=Homo sapiens GN=KRT9 PE=1 SV=3
94	93	sp|P22105|TENX_HUMAN	156.49	8	28	28	Carbamidomethylation; Deamidation (NQ)	458224	Tenascin-X OS=Homo sapiens GN=TNXB PE=1 SV=4
103	104	sp|Q09666|AHNK_HUMAN	150.82	7	28	25	Deamidation (NQ); Phosphorylation (STY)	629114	Neuroblast differentiation-associated protein AHNAK OS=Homo sapiens GN=AHNAK PE=1 SV=2
15	16	sp|P11142|HSP7C_HUMAN	213.8	48	28	19	Carbamidomethylation; Deamidation (NQ); Oxidation (M)	70898	Heat shock cognate 71 kDa protein OS=Homo sapiens GN=HSPA8 PE=1 SV=1
8	7	sp|P12110|CO6A2_HUMAN	227.97	31	27	27	Carbamidomethylation; Deamidation (NQ); Oxidation (M)	108579	Collagen alpha-2(VI) chain OS=Homo sapiens GN=COL6A2 PE=1 SV=4
29	19	sp|P14618|KPYM_HUMAN	215.87	56	27	27	Carbamidomethylation; Deamidation (NQ); Oxidation (M); Phosphorylation (STY)	57937	Pyruvate kinase PKM OS=Homo sapiens GN=PKM PE=1 SV=4
17	15	sp|Q08380|LG3BP_HUMAN	220.91	46	26	24	Carbamidomethylation; Deamidation (NQ); Oxidation (M); Phosphorylation (STY)	65331	Galectin-3-binding protein OS=Homo sapiens GN=LGALS3BP PE=1 SV=1
95	12	sp|P11047|LAMC1_HUMAN	199.12	20	25	21	Carbamidomethylation; Deamidation (NQ); Phosphorylation (STY)	177602	Laminin subunit gamma-1 OS=Homo sapiens GN=LAMC1 PE=1 SV=3
129	42	sp|Q9Y490|TLN1_HUMAN	173.03	15	25	18	Carbamidomethylation; Deamidation (NQ); Phosphorylation (STY)	269765	Talin-1 OS=Homo sapiens GN=TLN1 PE=1 SV=3
26	1	sp|Q8WUM4|PDC6I_HUMAN	232.93	40	24	24	Carbamidomethylation; Deamidation (NQ)	96023	Programmed cell death 6-interacting protein OS=Homo sapiens GN=PDCD6IP PE=1 SV=1
126	65	sp|Q00610|CLH1_HUMAN	155.36	20	23	23	Carbamidomethylation; Deamidation (NQ); Phosphorylation (STY)	191613	Clathrin heavy chain 1 OS=Homo sapiens GN=CLTC PE=1 SV=5
10	25	sp|Q08431|MFGM_HUMAN	196.88	65	23	21	Carbamidomethylation; Deamidation (NQ); Oxidation (M)	43123	Lactadherin OS=Homo sapiens GN=MFGE8 PE=1 SV=2
60	17	sp|P06756|ITAV_HUMAN	196.92	29	22	22	Carbamidomethylation; Deamidation (NQ); Oxidation (M)	116038	Integrin alpha-V OS=Homo sapiens GN=ITGAV PE=1 SV=2
114	78	sp|P55268|LAMB2_HUMAN	150.51	16	22	21	Carbamidomethylation; Deamidation (NQ)	195980	Laminin subunit beta-2 OS=Homo sapiens GN=LAMB2 PE=1 SV=2
100	67	sp|Q9H4M9|EHD1_HUMAN	156.88	49	22	19	Deamidation (NQ)	60627	EH domain-containing protein 1 OS=Homo sapiens GN=EHD1 PE=1 SV=2
18	29	sp|P07355|ANXA2_HUMAN	196.76	61	22	7	Carbamidomethylation; Deamidation (NQ); Oxidation (M); Phosphorylation (STY)	38604	Annexin A2 OS=Homo sapiens GN=ANXA2 PE=1 SV=2
65	24	sp|Q9P2B2|FPRP_HUMAN	189.32	30	21	20	Carbamidomethylation; Deamidation (NQ); Oxidation (M)	98556	Prostaglandin F2 receptor negative regulator OS=Homo sapiens GN=PTGFRN PE=1 SV=2
31	41	sp|P08670|VIME_HUMAN	170.83	49	21	20	Carbamidomethylation; Deamidation (NQ)	53652	Vimentin OS=Homo sapiens GN=VIM PE=1 SV=4
74	47	sp|P02452|CO1A1_HUMAN	169.61	20	21	17	Carbamidomethylation; Deamidation (NQ)	138942	Collagen alpha-1(I) chain OS=Homo sapiens GN=COL1A1 PE=1 SV=5
132	43	sp|P49327|FAS_HUMAN	161.46	13	20	19	Carbamidomethylation; Deamidation (NQ); Phosphorylation (STY)	273424	Fatty acid synthase OS=Homo sapiens GN=FASN PE=1 SV=3
22	40	sp|P08758|ANXA5_HUMAN	185.82	63	20	18	Deamidation (NQ); Oxidation (M)	35937	Annexin A5 OS=Homo sapiens GN=ANXA5 PE=1 SV=2
68	32	sp|P27487|DPP4_HUMAN	179.53	27	20	18	Carbamidomethylation; Deamidation (NQ)	88279	Dipeptidyl peptidase 4 OS=Homo sapiens GN=DPP4 PE=1 SV=2
119	51	sp|O94832|MYO1D_HUMAN	160.5	23	20	17	Carbamidomethylation; Oxidation (M); Phosphorylation (STY)	116202	Unconventional myosin-Id OS=Homo sapiens GN=MYO1D PE=1 SV=2
147	228	sp|P04114|APOB_HUMAN	120.75	4	20	13	Deamidation (NQ); Oxidation (M); Phosphorylation (STY)	515611	Apolipoprotein B-100 OS=Homo sapiens GN=APOB PE=1 SV=2
154	103	sp|Q99715|COCA1_HUMAN	139.2	8	19	18	Carbamidomethylation; Deamidation (NQ)	333147	Collagen alpha-1(XII) chain OS=Homo sapiens GN=COL12A1 PE=1 SV=2
101	39	sp|Q9NZN4|EHD2_HUMAN	174.08	40	19	15	Carbamidomethylation; Deamidation (NQ)	61162	EH domain-containing protein 2 OS=Homo sapiens GN=EHD2 PE=1 SV=2
88	38	sp|O43854|EDIL3_HUMAN	172.91	48	18	18	Carbamidomethylation; Deamidation (NQ)	53765	EGF-like repeat and discoidin I-like domain-containing protein 3 OS=Homo sapiens GN=EDIL3 PE=1 SV=1
136	27	sp|Q9Y6C2|EMIL1_HUMAN	178.67	27	18	17	Carbamidomethylation; Deamidation (NQ); Oxidation (M)	106667	EMILIN-1 OS=Homo sapiens GN=EMILIN1 PE=1 SV=2
106	36	sp|P09619|PGFRB_HUMAN	174.81	23	18	17	Carbamidomethylation; Deamidation (NQ)	123968	Platelet-derived growth factor receptor beta OS=Homo sapiens GN=PDGFRB PE=1 SV=1
36	62	sp|Q92743|HTRA1_HUMAN	167.14	46	18	17	Carbamidomethylation; Deamidation (NQ)	51287	Serine protease HTRA1 OS=Homo sapiens GN=HTRA1 PE=1 SV=1
148	76	sp|P46940|IQGA1_HUMAN	141.95	14	18	17	Deamidation (NQ); Phosphorylation (STY)	189251	Ras GTPase-activating-like protein IQGAP1 OS=Homo sapiens GN=IQGAP1 PE=1 SV=1
113	35	sp|P14543|NID1_HUMAN	172.99	19	18	16	Carbamidomethylation; Deamidation (NQ)	136377	Nidogen-1 OS=Homo sapiens GN=NID1 PE=1 SV=3
121	49	sp|P35579|MYH9_HUMAN	160.01	11	18	14	Deamidation (NQ)	226530	Myosin-9 OS=Homo sapiens GN=MYH9 PE=1 SV=4
96	37	sp|P05023|AT1A1_HUMAN	167.5	23	18	13	Carbamidomethylation; Oxidation (M)	112896	Sodium/potassium-transporting ATPase subunit alpha-1 OS=Homo sapiens GN=ATP1A1 PE=1 SV=1
73	33	sp|P0DMV9|HS71B_HUMAN	179.53	39	18	8	Carbamidomethylation; Deamidation (NQ); Oxidation (M); Phosphorylation (STY)	70052	Heat shock 70 kDa protein 1B OS=Homo sapiens GN=HSPA1B PE=1 SV=1
73	34	sp|P0DMV8|HS71A_HUMAN	179.53	39	18	8	Carbamidomethylation; Deamidation (NQ); Oxidation (M); Phosphorylation (STY)	70052	Heat shock 70 kDa protein 1A OS=Homo sapiens GN=HSPA1A PE=1 SV=1
43	55	sp|P07437|TBB5_HUMAN	166.68	48	18	3	Carbamidomethylation; Deamidation (NQ); Oxidation (M); Phosphorylation (STY)	49671	Tubulin beta chain OS=Homo sapiens GN=TUBB PE=1 SV=2
71	75	sp|P48668|K2C6C_HUMAN	153.7	32	18	2	Carbamidomethylation; Deamidation (NQ); Oxidation (M)	60025	Keratin type II cytoskeletal 6C OS=Homo sapiens GN=KRT6C PE=1 SV=3
57	70	sp|P68371|TBB4B_HUMAN	150.78	48	18	1	Carbamidomethylation; Deamidation (NQ); Oxidation (M); Phosphorylation (STY)	49831	Tubulin beta-4B chain OS=Homo sapiens GN=TUBB4B PE=1 SV=1
66	52	sp|P04083|ANXA1_HUMAN	183.45	53	17	16	Carbamidomethylation; Deamidation (NQ)	38714	Annexin A1 OS=Homo sapiens GN=ANXA1 PE=1 SV=2
61	58	sp|Q99536|VAT1_HUMAN	162.67	54	17	16	Carbamidomethylation; Oxidation (M)	41920	Synaptic vesicle membrane protein VAT-1 homolog OS=Homo sapiens GN=VAT1 PE=1 SV=2
104	54	sp|P09525|ANXA4_HUMAN	168.19	50	17	15	Carbamidomethylation; Oxidation (M)	35883	Annexin A4 OS=Homo sapiens GN=ANXA4 PE=1 SV=4
69	26	sp|P06733|ENOA_HUMAN	187.75	49	17	13	Carbamidomethylation; Deamidation (NQ); Oxidation (M)	47169	Alpha-enolase OS=Homo sapiens GN=ENO1 PE=1 SV=2
163	158	sp|O15031|PLXB2_HUMAN	124.95	9	17	13	Carbamidomethylation; Phosphorylation (STY)	205126	Plexin-B2 OS=Homo sapiens GN=PLXNB2 PE=1 SV=3
111	50	sp|P12814|ACTN1_HUMAN	157.12	24	17	9	Carbamidomethylation; Deamidation (NQ)	103058	Alpha-actinin-1 OS=Homo sapiens GN=ACTN1 PE=1 SV=2
81	135	sp|P13647|K2C5_HUMAN	141.37	28	17	7	Carbamidomethylation; Deamidation (NQ); Oxidation (M)	62378	Keratin type II cytoskeletal 5 OS=Homo sapiens GN=KRT5 PE=1 SV=3
40	86	sp|P04259|K2C6B_HUMAN	149.82	30	17	1	Carbamidomethylation; Deamidation (NQ); Oxidation (M)	60067	Keratin type II cytoskeletal 6B OS=Homo sapiens GN=KRT6B PE=1 SV=5
174	233	sp|P00533|EGFR_HUMAN	112.93	15	16	16	Carbamidomethylation; Deamidation (NQ); Oxidation (M); Phosphorylation (STY)	134277	Epidermal growth factor receptor OS=Homo sapiens GN=EGFR PE=1 SV=2
143	57	sp|P07942|LAMB1_HUMAN	159.44	13	16	15	Carbamidomethylation; Deamidation (NQ); Oxidation (M)	198037	Laminin subunit beta-1 OS=Homo sapiens GN=LAMB1 PE=1 SV=2
84	48	sp|P08253|MMP2_HUMAN	158.95	37	16	15	Carbamidomethylation; Deamidation (NQ)	73882	72 kDa type IV collagenase OS=Homo sapiens GN=MMP2 PE=1 SV=2
16	68	sp|P63261|ACTG_HUMAN	177.64	47	16	7	Carbamidomethylation; Deamidation (NQ); Oxidation (M)	41793	Actin cytoplasmic 2 OS=Homo sapiens GN=ACTG1 PE=1 SV=1
16	72	sp|P60709|ACTB_HUMAN	177.64	47	16	7	Carbamidomethylation; Deamidation (NQ); Oxidation (M)	41737	Actin cytoplasmic 1 OS=Homo sapiens GN=ACTB PE=1 SV=1
87	79	sp|Q13885|TBB2A_HUMAN	143.79	46	16	2	Carbamidomethylation; Deamidation (NQ); Oxidation (M); Phosphorylation (STY)	49907	Tubulin beta-2A chain OS=Homo sapiens GN=TUBB2A PE=1 SV=1
42	74	sp|A6NMY6|AXA2L_HUMAN	173.93	46	16	1	Carbamidomethylation; Oxidation (M); Phosphorylation (STY)	38659	Putative annexin A2-like protein OS=Homo sapiens GN=ANXA2P2 PE=5 SV=2
70	73	sp|P04350|TBB4A_HUMAN	146.43	43	16	1	Carbamidomethylation; Deamidation (NQ); Oxidation (M); Phosphorylation (STY)	49586	Tubulin beta-4A chain OS=Homo sapiens GN=TUBB4A PE=1 SV=2
72	46	sp|Q15582|BGH3_HUMAN	156.83	35	15	15	Carbamidomethylation; Deamidation (NQ)	74681	Transforming growth factor-beta-induced protein ig-h3 OS=Homo sapiens GN=TGFBI PE=1 SV=1
138	63	sp|P08195|4F2_HUMAN	153.85	34	15	15	Deamidation (NQ); Phosphorylation (STY)	67994	4F2 cell-surface antigen heavy chain OS=Homo sapiens GN=SLC3A2 PE=1 SV=3
137	66	sp|Q14112|NID2_HUMAN	153.78	16	15	14	Carbamidomethylation; Deamidation (NQ); Phosphorylation (STY)	151254	Nidogen-2 OS=Homo sapiens GN=NID2 PE=1 SV=3
130	94	sp|P02649|APOE_HUMAN	150.7	50	15	14	Carbamidomethylation; Deamidation (NQ); Oxidation (M); Phosphorylation (STY)	36154	Apolipoprotein E OS=Homo sapiens GN=APOE PE=1 SV=1
145	105	sp|P20020|AT2B1_HUMAN	136.44	15	15	11	Carbamidomethylation; Deamidation (NQ); Oxidation (M)	138755	Plasma membrane calcium-transporting ATPase 1 OS=Homo sapiens GN=ATP2B1 PE=1 SV=3
173	119	sp|P55072|TERA_HUMAN	130.63	25	15	11	Carbamidomethylation; Deamidation (NQ)	89322	Transitional endoplasmic reticulum ATPase OS=Homo sapiens GN=VCP PE=1 SV=4
89	53	sp|Q71U36|TBA1A_HUMAN	163.96	50	15	1	Carbamidomethylation; Deamidation (NQ)	50136	Tubulin alpha-1A chain OS=Homo sapiens GN=TUBA1A PE=1 SV=1
93	45	sp|P68363|TBA1B_HUMAN	167.21	50	15	0	Carbamidomethylation; Deamidation (NQ)	50152	Tubulin alpha-1B chain OS=Homo sapiens GN=TUBA1B PE=1 SV=1
49	82	sp|P68104|EF1A1_HUMAN	183.16	34	14	13	Carbamidomethylation; Oxidation (M)	50141	Elongation factor 1-alpha 1 OS=Homo sapiens GN=EEF1A1 PE=1 SV=1
49	83	sp|Q5VTE0|EF1A3_HUMAN	183.16	34	14	13	Carbamidomethylation; Oxidation (M)	50185	Putative elongation factor 1-alpha-like 3 OS=Homo sapiens GN=EEF1A1P5 PE=5 SV=1
77	61	sp|P50995|ANX11_HUMAN	164.22	28	14	13	Carbamidomethylation	54390	Annexin A11 OS=Homo sapiens GN=ANXA11 PE=1 SV=1
85	60	sp|P50281|MMP14_HUMAN	159.85	27	14	13	Deamidation (NQ); Oxidation (M)	65894	Matrix metalloproteinase-14 OS=Homo sapiens GN=MMP14 PE=1 SV=3
155	71	sp|P18206|VINC_HUMAN	145.32	17	14	13	Deamidation (NQ)	123799	Vinculin OS=Homo sapiens GN=VCL PE=1 SV=4
159	133	sp|P13611|CSPG2_HUMAN	138.03	5	14	11	Carbamidomethylation; Deamidation (NQ); Phosphorylation (STY)	372821	Versican core protein OS=Homo sapiens GN=VCAN PE=1 SV=3
20	159	sp|P20742|PZP_HUMAN	144.52	10	14	7	Carbamidomethylation; Deamidation (NQ); Oxidation (M); Phosphorylation (STY)	163862	Pregnancy zone protein OS=Homo sapiens GN=PZP PE=1 SV=4
83	77	sp|Q13509|TBB3_HUMAN	145.65	36	14	1	Carbamidomethylation; Deamidation (NQ); Oxidation (M)	50433	Tubulin beta-3 chain OS=Homo sapiens GN=TUBB3 PE=1 SV=2
91	56	sp|Q9BQE3|TBA1C_HUMAN	163.53	45	14	0	Carbamidomethylation; Deamidation (NQ)	49895	Tubulin alpha-1C chain OS=Homo sapiens GN=TUBA1C PE=1 SV=1
35	87	sp|P30493|1B55_HUMAN	147.53	44	14	0	Carbamidomethylation; Deamidation (NQ)	40496	HLA class I histocompatibility antigen B-55 alpha chain OS=Homo sapiens GN=HLA-B PE=1 SV=1
52	92	sp|P30480|1B42_HUMAN	144.73	40	14	0	Carbamidomethylation; Deamidation (NQ)	40333	HLA class I histocompatibility antigen B-42 alpha chain OS=Homo sapiens GN=HLA-B PE=1 SV=1
47	97	sp|P01889|1B07_HUMAN	143.08	40	14	0	Carbamidomethylation; Deamidation (NQ)	40460	HLA class I histocompatibility antigen B-7 alpha chain OS=Homo sapiens GN=HLA-B PE=1 SV=3
92	106	sp|Q29836|1B67_HUMAN	140.02	45	14	0	Carbamidomethylation; Deamidation (NQ)	40342	HLA class I histocompatibility antigen B-67 alpha chain OS=Homo sapiens GN=HLA-B PE=1 SV=1
13	95	sp|O00560|SDCB1_HUMAN	177.59	61	13	13	Carbamidomethylation; Deamidation (NQ); Oxidation (M)	32444	Syntenin-1 OS=Homo sapiens GN=SDCBP PE=1 SV=1
30	59	sp|P26022|PTX3_HUMAN	159.47	41	13	13	Carbamidomethylation; Deamidation (NQ); Oxidation (M)	41976	Pentraxin-related protein PTX3 OS=Homo sapiens GN=PTX3 PE=1 SV=3
144	89	sp|Q9UKK3|PARP4_HUMAN	134.87	10	13	13	Carbamidomethylation; Deamidation (NQ)	192593	Poly [ADP-ribose] polymerase 4 OS=Homo sapiens GN=PARP4 PE=1 SV=3
169	124	sp|P38606|VATA_HUMAN	126.19	28	13	13	Carbamidomethylation; Deamidation (NQ)	68304	V-type proton ATPase catalytic subunit A OS=Homo sapiens GN=ATP6V1A PE=1 SV=2
180	114	sp|P17301|ITA2_HUMAN	130.36	15	13	12	Carbamidomethylation; Deamidation (NQ); Phosphorylation (STY)	129295	Integrin alpha-2 OS=Homo sapiens GN=ITGA2 PE=1 SV=1
160	69	sp|Q16555|DPYL2_HUMAN	153.85	32	13	11	Carbamidomethylation	62294	Dihydropyrimidinase-related protein 2 OS=Homo sapiens GN=DPYSL2 PE=1 SV=1
165	100	sp|P02786|TFR1_HUMAN	135.38	20	13	11	Deamidation (NQ)	84871	Transferrin receptor protein 1 OS=Homo sapiens GN=TFRC PE=1 SV=2
157	189	sp|P08779|K1C16_HUMAN	133.58	25	13	5	Deamidation (NQ); Phosphorylation (STY)	51268	Keratin type I cytoskeletal 16 OS=Homo sapiens GN=KRT16 PE=1 SV=4
139	157	sp|P02533|K1C14_HUMAN	130.38	31	13	5	Deamidation (NQ); Oxidation (M)	51562	Keratin type I cytoskeletal 14 OS=Homo sapiens GN=KRT14 PE=1 SV=4
45	164	sp|P18462|1A25_HUMAN	134.98	36	13	2	Carbamidomethylation; Deamidation (NQ); Phosphorylation (STY)	41218	HLA class I histocompatibility antigen A-25 alpha chain OS=Homo sapiens GN=HLA-A PE=1 SV=1
212	1371	sp|Q8WZ42|TITIN_HUMAN	67.41	0	13	1	Deamidation (NQ)	3815922	Titin OS=Homo sapiens GN=TTN PE=1 SV=4
82	98	sp|P18463|1B37_HUMAN	142.93	42	13	0	Carbamidomethylation; Deamidation (NQ)	40456	HLA class I histocompatibility antigen B-37 alpha chain OS=Homo sapiens GN=HLA-B PE=1 SV=1
53	111	sp|P13746|1A11_HUMAN	142.46	40	13	0	Carbamidomethylation; Deamidation (NQ); Oxidation (M); Phosphorylation (STY)	40937	HLA class I histocompatibility antigen A-11 alpha chain OS=Homo sapiens GN=HLA-A PE=1 SV=1
80	96	sp|P30462|1B14_HUMAN	142.25	41	13	0	Carbamidomethylation; Deamidation (NQ)	40358	HLA class I histocompatibility antigen B-14 alpha chain OS=Homo sapiens GN=HLA-B PE=1 SV=1
58	99	sp|Q04826|1B40_HUMAN	141.93	39	13	0	Carbamidomethylation; Deamidation (NQ)	40505	HLA class I histocompatibility antigen B-40 alpha chain OS=Homo sapiens GN=HLA-B PE=1 SV=1
54	120	sp|P04439|1A03_HUMAN	141.77	40	13	0	Carbamidomethylation; Deamidation (NQ); Oxidation (M); Phosphorylation (STY)	40841	HLA class I histocompatibility antigen A-3 alpha chain OS=Homo sapiens GN=HLA-A PE=1 SV=2
184	117	sp|Q14254|FLOT2_HUMAN	132.86	32	12	12	Carbamidomethylation; Deamidation (NQ)	47064	Flotillin-2 OS=Homo sapiens GN=FLOT2 PE=1 SV=2
59	91	sp|P51149|RAB7A_HUMAN	148.31	64	12	11	Carbamidomethylation; Deamidation (NQ); Oxidation (M)	23490	Ras-related protein Rab-7a OS=Homo sapiens GN=RAB7A PE=1 SV=1
32	115	sp|P27105|STOM_HUMAN	134.84	49	12	11	Carbamidomethylation; Deamidation (NQ); Oxidation (M)	31731	Erythrocyte band 7 integral membrane protein OS=Homo sapiens GN=STOM PE=1 SV=3
161	125	sp|Q9UKU9|ANGL2_HUMAN	132.36	29	12	10	Carbamidomethylation; Deamidation (NQ); Phosphorylation (STY)	57105	Angiopoietin-related protein 2 OS=Homo sapiens GN=ANGPTL2 PE=2 SV=1
149	211	sp|P08123|CO1A2_HUMAN	126.54	10	12	9	Carbamidomethylation; Deamidation (NQ); Phosphorylation (STY)	129314	Collagen alpha-2(I) chain OS=Homo sapiens GN=COL1A2 PE=1 SV=7
152	88	sp|P04899|GNAI2_HUMAN	134.59	46	12	8	Carbamidomethylation; Deamidation (NQ)	40451	Guanine nucleotide-binding protein G(i) subunit alpha-2 OS=Homo sapiens GN=GNAI2 PE=1 SV=3
164	199	sp|P12259|FA5_HUMAN	130.02	5	12	8	Deamidation (NQ)	251701	Coagulation factor V OS=Homo sapiens GN=F5 PE=1 SV=4
168	113	sp|P13797|PLST_HUMAN	131.35	21	12	7	Carbamidomethylation; Deamidation (NQ); Oxidation (M); Phosphorylation (STY)	70811	Plastin-3 OS=Homo sapiens GN=PLS3 PE=1 SV=4
123	64	sp|O43707|ACTN4_HUMAN	146.65	16	12	4	Carbamidomethylation	104854	Alpha-actinin-4 OS=Homo sapiens GN=ACTN4 PE=1 SV=2
112	156	sp|Q9BUF5|TBB6_HUMAN	130.14	29	12	2	Carbamidomethylation; Deamidation (NQ); Oxidation (M); Phosphorylation (STY)	49857	Tubulin beta-6 chain OS=Homo sapiens GN=TUBB6 PE=1 SV=1
158	121	sp|P68366|TBA4A_HUMAN	147	42	12	1	Carbamidomethylation; Deamidation (NQ)	49924	Tubulin alpha-4A chain OS=Homo sapiens GN=TUBA4A PE=1 SV=1
55	148	sp|P16188|1A30_HUMAN	139.76	33	12	1	Carbamidomethylation; Deamidation (NQ)	40905	HLA class I histocompatibility antigen A-30 alpha chain OS=Homo sapiens GN=HLA-A PE=1 SV=2
48	112	sp|Q31610|1B81_HUMAN	153.92	36	12	0	Carbamidomethylation	40400	HLA class I histocompatibility antigen B-81 alpha chain OS=Homo sapiens GN=HLA-B PE=1 SV=1
41	101	sp|P10316|1A69_HUMAN	146.59	39	12	0	Carbamidomethylation; Deamidation (NQ)	40977	HLA class I histocompatibility antigen A-69 alpha chain OS=Homo sapiens GN=HLA-A PE=1 SV=2
41	102	sp|P01891|1A68_HUMAN	146.59	39	12	0	Carbamidomethylation; Deamidation (NQ)	40909	HLA class I histocompatibility antigen A-68 alpha chain OS=Homo sapiens GN=HLA-A PE=1 SV=4
34	129	sp|P30453|1A34_HUMAN	140.47	34	12	0	Carbamidomethylation; Deamidation (NQ)	41055	HLA class I histocompatibility antigen A-34 alpha chain OS=Homo sapiens GN=HLA-A PE=1 SV=1
78	126	sp|P30479|1B41_HUMAN	140.32	36	12	0	Carbamidomethylation; Deamidation (NQ)	40539	HLA class I histocompatibility antigen B-41 alpha chain OS=Homo sapiens GN=HLA-B PE=1 SV=1
62	143	sp|P30455|1A36_HUMAN	139.74	38	12	0	Carbamidomethylation; Deamidation (NQ); Oxidation (M)	40934	HLA class I histocompatibility antigen A-36 alpha chain OS=Homo sapiens GN=HLA-A PE=1 SV=1
56	154	sp|P30459|1A74_HUMAN	137.93	35	12	0	Carbamidomethylation; Deamidation (NQ)	40891	HLA class I histocompatibility antigen A-74 alpha chain OS=Homo sapiens GN=HLA-A PE=1 SV=1
110	132	sp|P30488|1B50_HUMAN	135.4	41	12	0	Carbamidomethylation; Deamidation (NQ)	40541	HLA class I histocompatibility antigen B-50 alpha chain OS=Homo sapiens GN=HLA-B PE=1 SV=1
44	155	sp|P30457|1A66_HUMAN	134.78	34	12	0	Carbamidomethylation; Deamidation (NQ); Phosphorylation (STY)	41082	HLA class I histocompatibility antigen A-66 alpha chain OS=Homo sapiens GN=HLA-A PE=1 SV=1
90	177	sp|P19823|ITIH2_HUMAN	139.44	14	11	11	Deamidation (NQ); Oxidation (M)	106463	Inter-alpha-trypsin inhibitor heavy chain H2 OS=Homo sapiens GN=ITIH2 PE=1 SV=2
218	144	sp|P30101|PDIA3_HUMAN	121.96	31	11	11	Deamidation (NQ)	56782	Protein disulfide-isomerase A3 OS=Homo sapiens GN=PDIA3 PE=1 SV=4
151	118	sp|Q8WWI5|CTL1_HUMAN	147.73	19	11	10	Carbamidomethylation; Deamidation (NQ)	73302	Choline transporter-like protein 1 OS=Homo sapiens GN=SLC44A1 PE=1 SV=1
97	283	sp|P02768|ALBU_HUMAN	133.16	20	11	10	Carbamidomethylation; Deamidation (NQ); Phosphorylation (STY)	69367	Serum albumin OS=Homo sapiens GN=ALB PE=1 SV=2
186	145	sp|Q9BTU6|P4K2A_HUMAN	119.77	31	11	10	Deamidation (NQ)	54022	Phosphatidylinositol 4-kinase type 2-alpha OS=Homo sapiens GN=PI4K2A PE=1 SV=1
198	191	sp|P50395|GDIB_HUMAN	111.54	29	11	10	Carbamidomethylation	50663	Rab GDP dissociation inhibitor beta OS=Homo sapiens GN=GDI2 PE=1 SV=2
39	109	sp|P04406|G3P_HUMAN	163.19	38	11	8	Carbamidomethylation; Deamidation (NQ); Oxidation (M)	36053	Glyceraldehyde-3-phosphate dehydrogenase OS=Homo sapiens GN=GAPDH PE=1 SV=3
175	161	sp|P23634|AT2B4_HUMAN	121.88	13	11	7	Carbamidomethylation; Deamidation (NQ); Oxidation (M); Phosphorylation (STY)	137920	Plasma membrane calcium-transporting ATPase 4 OS=Homo sapiens GN=ATP2B4 PE=1 SV=2
182	139	sp|P08238|HS90B_HUMAN	135.79	20	11	5	Carbamidomethylation	83264	Heat shock protein HSP 90-beta OS=Homo sapiens GN=HSP90AB1 PE=1 SV=4
127	150	sp|P26038|MOES_HUMAN	131.09	21	11	5	Carbamidomethylation; Deamidation (NQ); Oxidation (M)	67820	Moesin OS=Homo sapiens GN=MSN PE=1 SV=3
50	165	sp|P30450|1A26_HUMAN	132.1	35	11	1	Carbamidomethylation; Deamidation (NQ); Phosphorylation (STY)	41062	HLA class I histocompatibility antigen A-26 alpha chain OS=Homo sapiens GN=HLA-A PE=1 SV=2
79	146	sp|P01892|1A02_HUMAN	142.64	35	11	0	Carbamidomethylation; Deamidation (NQ)	40922	HLA class I histocompatibility antigen A-2 alpha chain OS=Homo sapiens GN=HLA-A PE=1 SV=1
67	173	sp|P30504|1C04_HUMAN	127.53	28	11	0	Carbamidomethylation; Deamidation (NQ)	40995	HLA class I histocompatibility antigen Cw-4 alpha chain OS=Homo sapiens GN=HLA-C PE=1 SV=1
67	171	sp|Q07000|1C15_HUMAN	127.53	28	11	0	Carbamidomethylation; Deamidation (NQ)	40863	HLA class I histocompatibility antigen Cw-15 alpha chain OS=Homo sapiens GN=HLA-C PE=1 SV=1
67	174	sp|P30510|1C14_HUMAN	127.53	28	11	0	Carbamidomethylation; Deamidation (NQ)	40838	HLA class I histocompatibility antigen Cw-14 alpha chain OS=Homo sapiens GN=HLA-C PE=1 SV=2
67	175	sp|P30508|1C12_HUMAN	127.53	28	11	0	Carbamidomethylation; Deamidation (NQ)	40886	HLA class I histocompatibility antigen Cw-12 alpha chain OS=Homo sapiens GN=HLA-C PE=1 SV=2
116	188	sp|Q29865|1C18_HUMAN	120.6	28	11	0	Carbamidomethylation; Deamidation (NQ)	40933	HLA class I histocompatibility antigen Cw-18 alpha chain OS=Homo sapiens GN=HLA-C PE=1 SV=1
116	186	sp|Q29963|1C06_HUMAN	120.6	28	11	0	Carbamidomethylation; Deamidation (NQ)	40969	HLA class I histocompatibility antigen Cw-6 alpha chain OS=Homo sapiens GN=HLA-C PE=1 SV=2
185	136	sp|P13639|EF2_HUMAN	130.26	16	10	10	Carbamidomethylation; Deamidation (NQ); Oxidation (M)	95338	Elongation factor 2 OS=Homo sapiens GN=EEF2 PE=1 SV=4
196	200	sp|P07237|PDIA1_HUMAN	122.91	21	10	10		57116	Protein disulfide-isomerase OS=Homo sapiens GN=P4HB PE=1 SV=3
230	178	sp|O60701|UGDH_HUMAN	112.35	24	10	10	Carbamidomethylation	55024	UDP-glucose 6-dehydrogenase OS=Homo sapiens GN=UGDH PE=1 SV=1
102	137	sp|Q15758|AAAT_HUMAN	147.55	23	10	9	Carbamidomethylation; Deamidation (NQ); Oxidation (M)	56598	Neutral amino acid transporter B(0) OS=Homo sapiens GN=SLC1A5 PE=1 SV=2
216	202	sp|Q9Y2J2|E41L3_HUMAN	111.29	13	10	9	Carbamidomethylation; Deamidation (NQ)	120677	Band 4.1-like protein 3 OS=Homo sapiens GN=EPB41L3 PE=1 SV=2
222	222	sp|O75131|CPNE3_HUMAN	94.55	20	10	9	Carbamidomethylation	60131	Copine-3 OS=Homo sapiens GN=CPNE3 PE=1 SV=1
201	208	sp|P50991|TCPD_HUMAN	127.32	22	10	7	Carbamidomethylation; Deamidation (NQ); Phosphorylation (STY)	57924	T-complex protein 1 subunit delta OS=Homo sapiens GN=CCT4 PE=1 SV=4
170	128	sp|Q9H223|EHD4_HUMAN	131.7	22	10	6		61175	EH domain-containing protein 4 OS=Homo sapiens GN=EHD4 PE=1 SV=1
99	163	sp|P34931|HS71L_HUMAN	144.35	21	10	1	Deamidation (NQ); Oxidation (M); Phosphorylation (STY)	70375	Heat shock 70 kDa protein 1-like OS=Homo sapiens GN=HSPA1L PE=1 SV=2
108	179	sp|P10321|1C07_HUMAN	124.97	28	10	0	Carbamidomethylation; Deamidation (NQ)	40649	HLA class I histocompatibility antigen Cw-7 alpha chain OS=Homo sapiens GN=HLA-C PE=1 SV=3
64	209	sp|P30501|1C02_HUMAN	120.89	25	10	0	Carbamidomethylation; Deamidation (NQ)	41095	HLA class I histocompatibility antigen Cw-2 alpha chain OS=Homo sapiens GN=HLA-C PE=1 SV=1
86	187	sp|Q31612|1B73_HUMAN	120.32	31	10	0	Carbamidomethylation; Deamidation (NQ)	40435	HLA class I histocompatibility antigen B-73 alpha chain OS=Homo sapiens GN=HLA-B PE=1 SV=1
120	221	sp|P30499|1C01_HUMAN	113.95	24	10	0	Carbamidomethylation; Deamidation (NQ)	40965	HLA class I histocompatibility antigen Cw-1 alpha chain OS=Homo sapiens GN=HLA-C PE=1 SV=1
197	138	sp|P21281|VATB2_HUMAN	145.63	25	9	9	Carbamidomethylation; Deamidation (NQ)	56501	V-type proton ATPase subunit B brain isoform OS=Homo sapiens GN=ATP6V1B2 PE=1 SV=3
156	172	sp|P05556|ITB1_HUMAN	139.38	13	9	9	Deamidation (NQ); Oxidation (M)	88415	Integrin beta-1 OS=Homo sapiens GN=ITGB1 PE=1 SV=2
124	153	sp|Q14108|SCRB2_HUMAN	137.42	26	9	9	Carbamidomethylation; Deamidation (NQ); Oxidation (M)	54290	Lysosome membrane protein 2 OS=Homo sapiens GN=SCARB2 PE=1 SV=2
176	122	sp|Q7Z7G0|TARSH_HUMAN	132.11	12	9	9	Carbamidomethylation	118642	Target of Nesh-SH3 OS=Homo sapiens GN=ABI3BP PE=1 SV=1
189	185	sp|O15118|NPC1_HUMAN	110.63	8	9	9	Carbamidomethylation	142166	Niemann-Pick C1 protein OS=Homo sapiens GN=NPC1 PE=1 SV=2
231	279	sp|P07093|GDN_HUMAN	101.66	21	9	9	Deamidation (NQ)	44002	Glia-derived nexin OS=Homo sapiens GN=SERPINE2 PE=1 SV=1
171	142	sp|P05106|ITB3_HUMAN	135.21	14	9	8	Carbamidomethylation	87058	Integrin beta-3 OS=Homo sapiens GN=ITGB3 PE=1 SV=2
146	140	sp|P11021|GRP78_HUMAN	142.16	19	9	7	Deamidation (NQ)	72333	78 kDa glucose-regulated protein OS=Homo sapiens GN=HSPA5 PE=1 SV=2
206	182	sp|O00159|MYO1C_HUMAN	124.48	11	9	7	Carbamidomethylation; Deamidation (NQ)	121682	Unconventional myosin-Ic OS=Homo sapiens GN=MYO1C PE=1 SV=4
153	203	sp|P61586|RHOA_HUMAN	120.52	43	9	7	Carbamidomethylation; Deamidation (NQ)	21768	Transforming protein RhoA OS=Homo sapiens GN=RHOA PE=1 SV=1
259	205	sp|Q16658|FSCN1_HUMAN	112.88	23	9	7	Carbamidomethylation; Phosphorylation (STY)	54530	Fascin OS=Homo sapiens GN=FSCN1 PE=1 SV=3
285	336	sp|P01024|CO3_HUMAN	86.08	6	9	7	Deamidation (NQ); Oxidation (M); Phosphorylation (STY)	187147	Complement C3 OS=Homo sapiens GN=C3 PE=1 SV=2
228	268	sp|P17987|TCPA_HUMAN	85.76	20	9	7	Carbamidomethylation; Deamidation (NQ); Oxidation (M); Phosphorylation (STY)	60344	T-complex protein 1 subunit alpha OS=Homo sapiens GN=TCP1 PE=1 SV=1
236	302	sp|P35222|CTNB1_HUMAN	82.06	14	9	7	Carbamidomethylation; Deamidation (NQ); Oxidation (M); Phosphorylation (STY)	85497	Catenin beta-1 OS=Homo sapiens GN=CTNNB1 PE=1 SV=1
252	397	sp|Q14204|DYHC1_HUMAN	68.72	2	9	7	Deamidation (NQ)	532412	Cytoplasmic dynein 1 heavy chain 1 OS=Homo sapiens GN=DYNC1H1 PE=1 SV=5
226	245	sp|O00186|STXB3_HUMAN	98.04	13	9	6		67764	Syntaxin-binding protein 3 OS=Homo sapiens GN=STXBP3 PE=1 SV=2
253	452	sp|Q04695|K1C17_HUMAN	66.04	21	9	4	Deamidation (NQ); Phosphorylation (STY)	48106	Keratin type I cytoskeletal 17 OS=Homo sapiens GN=KRT17 PE=1 SV=2
38	198	sp|P54652|HSP72_HUMAN	146.12	13	9	1	Deamidation (NQ)	70021	Heat shock-related 70 kDa protein 2 OS=Homo sapiens GN=HSPA2 PE=1 SV=1
24	237	sp|A5A3E0|POTEF_HUMAN	141.83	8	9	0	Deamidation (NQ)	121444	POTE ankyrin domain family member F OS=Homo sapiens GN=POTEF PE=1 SV=2
243	176	sp|P50990|TCPQ_HUMAN	130.23	18	8	8		59621	T-complex protein 1 subunit theta OS=Homo sapiens GN=CCT8 PE=1 SV=4
219	192	sp|P18084|ITB5_HUMAN	128.53	16	8	8	Carbamidomethylation	88054	Integrin beta-5 OS=Homo sapiens GN=ITGB5 PE=1 SV=1
239	201	sp|O14786|NRP1_HUMAN	121.33	14	8	8	Carbamidomethylation; Deamidation (NQ)	103134	Neuropilin-1 OS=Homo sapiens GN=NRP1 PE=1 SV=3
131	285	sp|O14495|PLPP3_HUMAN	118.51	20	8	8	Carbamidomethylation	35116	Phospholipid phosphatase 3 OS=Homo sapiens GN=PLPP3 PE=1 SV=1
134	183	sp|P20073|ANXA7_HUMAN	116.58	20	8	8	Carbamidomethylation	52739	Annexin A7 OS=Homo sapiens GN=ANXA7 PE=1 SV=3
229	219	sp|Q14392|LRC32_HUMAN	109.59	18	8	8	Carbamidomethylation; Deamidation (NQ); Phosphorylation (STY)	71979	Leucine-rich repeat-containing protein 32 OS=Homo sapiens GN=LRRC32 PE=1 SV=1
260	249	sp|P11413|G6PD_HUMAN	102.5	18	8	8	Carbamidomethylation	59257	Glucose-6-phosphate 1-dehydrogenase OS=Homo sapiens GN=G6PD PE=1 SV=4
280	257	sp|P80723|BASP1_HUMAN	122.88	48	8	7	Deamidation (NQ); Phosphorylation (STY)	22693	Brain acid soluble protein 1 OS=Homo sapiens GN=BASP1 PE=1 SV=2
227	255	sp|P53396|ACLY_HUMAN	117.18	9	8	7	Carbamidomethylation	120839	ATP-citrate synthase OS=Homo sapiens GN=ACLY PE=1 SV=3
172	212	sp|P63092|GNAS2_HUMAN	103.58	24	8	7	Carbamidomethylation	45665	Guanine nucleotide-binding protein G(s) subunit alpha isoforms short OS=Homo sapiens GN=GNAS PE=1 SV=1
172	213	sp|Q5JWF2|GNAS1_HUMAN	103.58	9	8	7	Carbamidomethylation	111024	Guanine nucleotide-binding protein G(s) subunit alpha isoforms XLas OS=Homo sapiens GN=GNAS PE=1 SV=2
248	286	sp|P04843|RPN1_HUMAN	81.57	16	8	7	Carbamidomethylation	68569	Dolichyl-diphosphooligosaccharide--protein glycosyltransferase subunit 1 OS=Homo sapiens GN=RPN1 PE=1 SV=1
234	216	sp|P14625|ENPL_HUMAN	117.01	9	8	6	Deamidation (NQ); Phosphorylation (STY)	92469	Endoplasmin OS=Homo sapiens GN=HSP90B1 PE=1 SV=1
268	256	sp|P33527|MRP1_HUMAN	91.16	7	8	6	Deamidation (NQ); Phosphorylation (STY)	171590	Multidrug resistance-associated protein 1 OS=Homo sapiens GN=ABCC1 PE=1 SV=3
166	227	sp|P62879|GBB2_HUMAN	113.86	31	8	5	Carbamidomethylation; Deamidation (NQ)	37331	Guanine nucleotide-binding protein G(I)/G(S)/G(T) subunit beta-2 OS=Homo sapiens GN=GNB2 PE=1 SV=3
202	166	sp|P07900|HS90A_HUMAN	121.64	14	8	3		84660	Heat shock protein HSP 90-alpha OS=Homo sapiens GN=HSP90AA1 PE=1 SV=5
179	238	sp|P61224|RAP1B_HUMAN	118.87	42	8	2	Carbamidomethylation; Deamidation (NQ); Oxidation (M)	20825	Ras-related protein Rap-1b OS=Homo sapiens GN=RAP1B PE=1 SV=1
21	226	sp|P68133|ACTS_HUMAN	137.42	20	8	1	Deamidation (NQ); Oxidation (M)	42051	Actin alpha skeletal muscle OS=Homo sapiens GN=ACTA1 PE=1 SV=1
21	225	sp|P68032|ACTC_HUMAN	137.42	20	8	1	Deamidation (NQ); Oxidation (M)	42019	Actin alpha cardiac muscle 1 OS=Homo sapiens GN=ACTC1 PE=1 SV=1
318	246	sp|Q9Y4G6|TLN2_HUMAN	90.81	3	8	1	Carbamidomethylation; Phosphorylation (STY)	271611	Talin-2 OS=Homo sapiens GN=TLN2 PE=1 SV=4
63	215	sp|Q95604|1C17_HUMAN	136.3	23	8	0	Carbamidomethylation; Deamidation (NQ)	41238	HLA class I histocompatibility antigen Cw-17 alpha chain OS=Homo sapiens GN=HLA-C PE=1 SV=1
98	184	sp|P05534|1A24_HUMAN	130.17	31	8	0	Carbamidomethylation; Deamidation (NQ); Oxidation (M)	40689	HLA class I histocompatibility antigen A-24 alpha chain OS=Homo sapiens GN=HLA-A PE=1 SV=2
109	299	sp|P0CG38|POTEI_HUMAN	124.44	6	8	0	Deamidation (NQ)	121282	POTE ankyrin domain family member I OS=Homo sapiens GN=POTEI PE=3 SV=1
105	207	sp|P30447|1A23_HUMAN	124.1	30	8	0	Carbamidomethylation; Deamidation (NQ)	40733	HLA class I histocompatibility antigen A-23 alpha chain OS=Homo sapiens GN=HLA-A PE=1 SV=1
150	232	sp|Q09160|1A80_HUMAN	108.93	26	8	0	Deamidation (NQ); Oxidation (M); Phosphorylation (STY)	40792	HLA class I histocompatibility antigen A-80 alpha chain OS=Homo sapiens GN=HLA-A PE=1 SV=1
286	2536	sp|Q03001|DYST_HUMAN	53.65	1	8	0		860679	Dystonin OS=Homo sapiens GN=DST PE=1 SV=4
269	5068	sp|Q5CZC0|FSIP2_HUMAN	52.75	1	8	0	Deamidation (NQ)	780624	Fibrous sheath-interacting protein 2 OS=Homo sapiens GN=FSIP2 PE=2 SV=4
240	196	sp|Q01518|CAP1_HUMAN	131.71	22	7	7	Carbamidomethylation; Deamidation (NQ)	51902	Adenylyl cyclase-associated protein 1 OS=Homo sapiens GN=CAP1 PE=1 SV=5
223	321	sp|P23528|COF1_HUMAN	124.79	40	7	7	Carbamidomethylation; Deamidation (NQ)	18502	Cofilin-1 OS=Homo sapiens GN=CFL1 PE=1 SV=3
255	204	sp|Q92542|NICA_HUMAN	115.65	12	7	7	Deamidation (NQ)	78411	Nicastrin OS=Homo sapiens GN=NCSTN PE=1 SV=2
233	195	sp|O75083|WDR1_HUMAN	112.26	18	7	7	Carbamidomethylation	66194	WD repeat-containing protein 1 OS=Homo sapiens GN=WDR1 PE=1 SV=4
272	239	sp|P10909|CLUS_HUMAN	96.83	22	7	7	Carbamidomethylation	52495	Clusterin OS=Homo sapiens GN=CLU PE=1 SV=1
215	243	sp|P61158|ARP3_HUMAN	86.59	26	7	7	Carbamidomethylation; Deamidation (NQ)	47371	Actin-related protein 3 OS=Homo sapiens GN=ACTR3 PE=1 SV=3
225	244	sp|P49368|TCPG_HUMAN	108.53	16	7	6	Carbamidomethylation; Phosphorylation (STY)	60534	T-complex protein 1 subunit gamma OS=Homo sapiens GN=CCT3 PE=1 SV=4
205	231	sp|Q9UKX5|ITA11_HUMAN	107.74	8	7	6	Carbamidomethylation; Deamidation (NQ)	133470	Integrin alpha-11 OS=Homo sapiens GN=ITGA11 PE=1 SV=2
181	224	sp|P16234|PGFRA_HUMAN	106.83	8	7	6	Carbamidomethylation; Deamidation (NQ)	122670	Platelet-derived growth factor receptor alpha OS=Homo sapiens GN=PDGFRA PE=1 SV=1
214	289	sp|P07585|PGS2_HUMAN	102.13	26	7	6	Carbamidomethylation; Deamidation (NQ); Phosphorylation (STY)	39747	Decorin OS=Homo sapiens GN=DCN PE=1 SV=1
217	288	sp|P43007|SATT_HUMAN	95.18	17	7	6	Deamidation (NQ)	55723	Neutral amino acid transporter A OS=Homo sapiens GN=SLC1A4 PE=1 SV=1
254	315	sp|Q99832|TCPH_HUMAN	92.76	12	7	6	Carbamidomethylation	59367	T-complex protein 1 subunit eta OS=Homo sapiens GN=CCT7 PE=1 SV=2
312	350	sp|O14818|PSA7_HUMAN	78.54	32	7	6	Phosphorylation (STY)	27887	Proteasome subunit alpha type-7 OS=Homo sapiens GN=PSMA7 PE=1 SV=1
141	193	sp|P63104|1433Z_HUMAN	126.03	37	7	5	Carbamidomethylation; Deamidation (NQ)	27745	14-3-3 protein zeta/delta OS=Homo sapiens GN=YWHAZ PE=1 SV=1
177	235	sp|P61106|RAB14_HUMAN	106.24	34	7	5	Carbamidomethylation	23897	Ras-related protein Rab-14 OS=Homo sapiens GN=RAB14 PE=1 SV=4
332	427	sp|P61764|STXB1_HUMAN	84.16	14	7	5	Deamidation (NQ); Phosphorylation (STY)	67569	Syntaxin-binding protein 1 OS=Homo sapiens GN=STXBP1 PE=1 SV=1
117	234	sp|P62873|GBB1_HUMAN	118.59	30	7	4	Carbamidomethylation; Deamidation (NQ)	37377	Guanine nucleotide-binding protein G(I)/G(S)/G(T) subunit beta-1 OS=Homo sapiens GN=GNB1 PE=1 SV=3
287	292	sp|O43795|MYO1B_HUMAN	106.81	8	7	4	Deamidation (NQ)	131985	Unconventional myosin-Ib OS=Homo sapiens GN=MYO1B PE=1 SV=3
319	497	sp|Q8IVF2|AHNK2_HUMAN	59.54	1	7	4	Deamidation (NQ); Phosphorylation (STY)	616641	Protein AHNAK2 OS=Homo sapiens GN=AHNAK2 PE=1 SV=2
33	443	sp|Q562R1|ACTBL_HUMAN	98.37	25	7	3	Deamidation (NQ); Phosphorylation (STY)	42003	Beta-actin-like protein 2 OS=Homo sapiens GN=ACTBL2 PE=1 SV=2
289	487	sp|O75094|SLIT3_HUMAN	91.7	4	7	3	Deamidation (NQ)	167712	Slit homolog 3 protein OS=Homo sapiens GN=SLIT3 PE=2 SV=3
290	267	sp|P63010|AP2B1_HUMAN	109.22	11	7	2	Carbamidomethylation; Deamidation (NQ); Oxidation (M); Phosphorylation (STY)	104553	AP-2 complex subunit beta OS=Homo sapiens GN=AP2B1 PE=1 SV=1
224	366	sp|P50993|AT1A2_HUMAN	101.7	11	7	2	Oxidation (M); Phosphorylation (STY)	112265	Sodium/potassium-transporting ATPase subunit alpha-2 OS=Homo sapiens GN=ATP1A2 PE=1 SV=1
122	349	sp|Q5XKE5|K2C79_HUMAN	104.13	10	7	1	Deamidation (NQ); Oxidation (M)	57836	Keratin type II cytoskeletal 79 OS=Homo sapiens GN=KRT79 PE=1 SV=2
162	306	sp|P15311|EZRI_HUMAN	103.3	10	7	1	Deamidation (NQ)	69413	Ezrin OS=Homo sapiens GN=EZR PE=1 SV=4
211	301	sp|P62834|RAP1A_HUMAN	97.86	35	7	1		20987	Ras-related protein Rap-1A OS=Homo sapiens GN=RAP1A PE=1 SV=1
348	537	sp|Q9Y4D7|PLXD1_HUMAN	75.35	2	7	1	Deamidation (NQ); Phosphorylation (STY)	212005	Plexin-D1 OS=Homo sapiens GN=PLXND1 PE=1 SV=3
107	214	sp|P17066|HSP76_HUMAN	135.19	12	7	0	Carbamidomethylation; Deamidation (NQ)	71028	Heat shock 70 kDa protein 6 OS=Homo sapiens GN=HSPA6 PE=1 SV=2
142	223	sp|P01893|HLAH_HUMAN	111.25	23	7	0	Deamidation (NQ); Oxidation (M)	40892	Putative HLA class I histocompatibility antigen alpha chain H OS=Homo sapiens GN=HLA-H PE=5 SV=3
323	4626	sp|Q8WXG9|GPR98_HUMAN	49.16	1	7	0	Deamidation (NQ); Phosphorylation (STY)	693082	G-protein coupled receptor 98 OS=Homo sapiens GN=GPR98 PE=1 SV=2
339	5459	sp|Q9Y6R7|FCGBP_HUMAN	46.77	1	7	0	Deamidation (NQ); Phosphorylation (STY)	572021	IgGFc-binding protein OS=Homo sapiens GN=FCGBP PE=1 SV=3
140	296	sp|P16070|CD44_HUMAN	132.74	13	6	6	Carbamidomethylation; Deamidation (NQ); Phosphorylation (STY)	81538	CD44 antigen OS=Homo sapiens GN=CD44 PE=1 SV=3
194	220	sp|P11279|LAMP1_HUMAN	124.14	16	6	6	Deamidation (NQ)	44882	Lysosome-associated membrane glycoprotein 1 OS=Homo sapiens GN=LAMP1 PE=1 SV=3
232	217	sp|Q15113|PCOC1_HUMAN	120.56	20	6	6	Carbamidomethylation	47973	Procollagen C-endopeptidase enhancer 1 OS=Homo sapiens GN=PCOLCE PE=1 SV=2
115	259	sp|P62987|RL40_HUMAN	115.75	42	6	6	Deamidation (NQ)	14728	Ubiquitin-60S ribosomal protein L40 OS=Homo sapiens GN=UBA52 PE=1 SV=2
115	264	sp|P62979|RS27A_HUMAN	115.75	35	6	6	Deamidation (NQ)	17965	Ubiquitin-40S ribosomal protein S27a OS=Homo sapiens GN=RPS27A PE=1 SV=2
115	273	sp|P0CG47|UBB_HUMAN	115.75	24	6	6	Deamidation (NQ)	25762	Polyubiquitin-B OS=Homo sapiens GN=UBB PE=1 SV=1
115	278	sp|P0CG48|UBC_HUMAN	115.75	8	6	6	Deamidation (NQ)	77039	Polyubiquitin-C OS=Homo sapiens GN=UBC PE=1 SV=3
237	252	sp|Q13641|TPBG_HUMAN	113.96	18	6	6	Phosphorylation (STY)	46032	Trophoblast glycoprotein OS=Homo sapiens GN=TPBG PE=1 SV=1
187	241	sp|P07737|PROF1_HUMAN	113.55	56	6	6	Deamidation (NQ)	15054	Profilin-1 OS=Homo sapiens GN=PFN1 PE=1 SV=2
357	262	sp|O43175|SERA_HUMAN	105.3	16	6	6	Carbamidomethylation	56651	D-3-phosphoglycerate dehydrogenase OS=Homo sapiens GN=PHGDH PE=1 SV=4
349	270	sp|O75955|FLOT1_HUMAN	98.07	17	6	6		47355	Flotillin-1 OS=Homo sapiens GN=FLOT1 PE=1 SV=3
298	265	sp|P60174|TPIS_HUMAN	96.6	32	6	6	Carbamidomethylation	30791	Triosephosphate isomerase OS=Homo sapiens GN=TPI1 PE=1 SV=3
309	275	sp|P16671|CD36_HUMAN	95.76	13	6	6	Carbamidomethylation	53053	Platelet glycoprotein 4 OS=Homo sapiens GN=CD36 PE=1 SV=2
264	258	sp|P10301|RRAS_HUMAN	95.27	33	6	6	Carbamidomethylation	23480	Ras-related protein R-Ras OS=Homo sapiens GN=RRAS PE=1 SV=1
371	331	sp|P50502|F10A1_HUMAN	95.26	20	6	6	Carbamidomethylation; Deamidation (NQ); Phosphorylation (STY)	41332	Hsc70-interacting protein OS=Homo sapiens GN=ST13 PE=1 SV=2
316	247	sp|P61019|RAB2A_HUMAN	94.33	34	6	6	Carbamidomethylation; Deamidation (NQ)	23546	Ras-related protein Rab-2A OS=Homo sapiens GN=RAB2A PE=1 SV=1
310	254	sp|Q99816|TS101_HUMAN	91.55	18	6	6	Deamidation (NQ)	43944	Tumor susceptibility gene 101 protein OS=Homo sapiens GN=TSG101 PE=1 SV=2
314	423	sp|Q13501|SQSTM_HUMAN	91.4	20	6	6		47687	Sequestosome-1 OS=Homo sapiens GN=SQSTM1 PE=1 SV=1
288	322	sp|Q7L576|CYFP1_HUMAN	90.57	6	6	6	Deamidation (NQ)	145182	Cytoplasmic FMR1-interacting protein 1 OS=Homo sapiens GN=CYFIP1 PE=1 SV=1
238	316	sp|Q9NRY6|PLS3_HUMAN	83.42	26	6	6	Carbamidomethylation; Deamidation (NQ)	31648	Phospholipid scramblase 3 OS=Homo sapiens GN=PLSCR3 PE=1 SV=2
303	318	sp|Q6YHK3|CD109_HUMAN	71.09	6	6	6		161688	CD109 antigen OS=Homo sapiens GN=CD109 PE=1 SV=2
412	498	sp|Q16832|DDR2_HUMAN	48.62	10	6	6		96736	Discoidin domain-containing receptor 2 OS=Homo sapiens GN=DDR2 PE=1 SV=2
199	293	sp|Q96QD8|S38A2_HUMAN	121.63	17	6	5	Carbamidomethylation; Deamidation (NQ); Phosphorylation (STY)	56026	Sodium-coupled neutral amino acid transporter 2 OS=Homo sapiens GN=SLC38A2 PE=1 SV=2
363	281	sp|Q9ULV4|COR1C_HUMAN	101.5	15	6	5	Carbamidomethylation; Deamidation (NQ)	53249	Coronin-1C OS=Homo sapiens GN=CORO1C PE=1 SV=1
304	383	sp|Q8IWA5|CTL2_HUMAN	92.06	9	6	5	Carbamidomethylation	80124	Choline transporter-like protein 2 OS=Homo sapiens GN=SLC44A2 PE=1 SV=3
302	308	sp|P17302|CXA1_HUMAN	85.45	19	6	5	Deamidation (NQ)	43008	Gap junction alpha-1 protein OS=Homo sapiens GN=GJA1 PE=1 SV=2
279	357	sp|P23381|SYWC_HUMAN	83.66	18	6	5	Carbamidomethylation	53165	Tryptophan--tRNA ligase cytoplasmic OS=Homo sapiens GN=WARS PE=1 SV=2
209	250	sp|P62258|1433E_HUMAN	116.95	24	6	4	Carbamidomethylation; Deamidation (NQ)	29174	14-3-3 protein epsilon OS=Homo sapiens GN=YWHAE PE=1 SV=1
207	240	sp|P00338|LDHA_HUMAN	106.38	17	6	4		36689	L-lactate dehydrogenase A chain OS=Homo sapiens GN=LDHA PE=1 SV=2
220	229	sp|P27348|1433T_HUMAN	99.6	32	6	4	Carbamidomethylation; Deamidation (NQ)	27764	14-3-3 protein theta OS=Homo sapiens GN=YWHAQ PE=1 SV=1
178	303	sp|Q9H0U4|RAB1B_HUMAN	95.29	43	6	4		22171	Ras-related protein Rab-1B OS=Homo sapiens GN=RAB1B PE=1 SV=1
263	251	sp|Q86YQ8|CPNE8_HUMAN	81.89	13	6	3		63108	Copine-8 OS=Homo sapiens GN=CPNE8 PE=1 SV=2
267	480	sp|Q14315|FLNC_HUMAN	70.54	2	6	3	Deamidation (NQ)	291020	Filamin-C OS=Homo sapiens GN=FLNC PE=1 SV=3
210	269	sp|P08754|GNAI3_HUMAN	89.89	22	6	2	Carbamidomethylation	40532	Guanine nucleotide-binding protein G(k) subunit alpha OS=Homo sapiens GN=GNAI3 PE=1 SV=3
324	284	sp|Q10567|AP1B1_HUMAN	103.2	8	6	1	Carbamidomethylation; Phosphorylation (STY)	104637	AP-1 complex subunit beta-1 OS=Homo sapiens GN=AP1B1 PE=1 SV=2
350	496	sp|Q9UBC5|MYO1A_HUMAN	96.8	4	6	1	Deamidation (NQ)	118401	Unconventional myosin-Ia OS=Homo sapiens GN=MYO1A PE=2 SV=1
135	353	sp|Q7Z3Y8|K1C27_HUMAN	93.62	13	6	1	Deamidation (NQ)	49822	Keratin type I cytoskeletal 27 OS=Homo sapiens GN=KRT27 PE=1 SV=2
200	382	sp|P12035|K2C3_HUMAN	79.72	8	6	1	Deamidation (NQ); Oxidation (M)	64417	Keratin type II cytoskeletal 3 OS=Homo sapiens GN=KRT3 PE=1 SV=3
291	494	sp|P02458|CO2A1_HUMAN	73.85	3	6	0	Deamidation (NQ)	141786	Collagen alpha-1(II) chain OS=Homo sapiens GN=COL2A1 PE=1 SV=3
46	320	sp|P60033|CD81_HUMAN	110.89	28	5	5	Carbamidomethylation; Deamidation (NQ)	25809	CD81 antigen OS=Homo sapiens GN=CD81 PE=1 SV=1
335	282	sp|P07195|LDHB_HUMAN	107.58	19	5	5		36639	L-lactate dehydrogenase B chain OS=Homo sapiens GN=LDHB PE=1 SV=2
270	248	sp|Q99829|CPNE1_HUMAN	102.05	10	5	5		59059	Copine-1 OS=Homo sapiens GN=CPNE1 PE=1 SV=1
256	253	sp|P78539|SRPX_HUMAN	99.86	13	5	5	Carbamidomethylation	51572	Sushi repeat-containing protein SRPX OS=Homo sapiens GN=SRPX PE=1 SV=1
192	277	sp|P69905|HBA_HUMAN	99.2	43	5	5	Oxidation (M)	15258	Hemoglobin subunit alpha OS=Homo sapiens GN=HBA1 PE=1 SV=2
395	304	sp|P41250|GARS_HUMAN	98.21	11	5	5	Phosphorylation (STY)	83166	Glycine--tRNA ligase OS=Homo sapiens GN=GARS PE=1 SV=3
375	294	sp|P63000|RAC1_HUMAN	92.1	29	5	5	Carbamidomethylation	21450	Ras-related C3 botulinum toxin substrate 1 OS=Homo sapiens GN=RAC1 PE=1 SV=1
311	266	sp|P04075|ALDOA_HUMAN	91.85	17	5	5		39420	Fructose-bisphosphate aldolase A OS=Homo sapiens GN=ALDOA PE=1 SV=2
281	291	sp|P62805|H4_HUMAN	90.82	48	5	5	Oxidation (M)	11367	Histone H4 OS=Homo sapiens GN=HIST1H4A PE=1 SV=2
396	367	sp|Q15063|POSTN_HUMAN	90.23	12	5	5	Deamidation (NQ)	93314	Periostin OS=Homo sapiens GN=POSTN PE=1 SV=2
329	356	sp|P27701|CD82_HUMAN	88.79	24	5	5	Carbamidomethylation; Deamidation (NQ)	29626	CD82 antigen OS=Homo sapiens GN=CD82 PE=1 SV=1
334	389	sp|Q9BRK3|MXRA8_HUMAN	86.87	10	5	5	Carbamidomethylation	49132	Matrix remodeling-associated protein 8 OS=Homo sapiens GN=MXRA8 PE=1 SV=1
406	457	sp|P09543|CN37_HUMAN	84.1	12	5	5	Carbamidomethylation; Deamidation (NQ)	47579	2' 3'-cyclic-nucleotide 3'-phosphodiesterase OS=Homo sapiens GN=CNP PE=1 SV=2
297	311	sp|P35613|BASI_HUMAN	83.94	20	5	5	Carbamidomethylation	42200	Basigin OS=Homo sapiens GN=BSG PE=1 SV=2
275	328	sp|Q9Y639|NPTN_HUMAN	83.73	16	5	5	Carbamidomethylation	44387	Neuroplastin OS=Homo sapiens GN=NPTN PE=1 SV=2
299	280	sp|P08648|ITA5_HUMAN	80.91	6	5	5	Carbamidomethylation	114536	Integrin alpha-5 OS=Homo sapiens GN=ITGA5 PE=1 SV=2
401	305	sp|O43776|SYNC_HUMAN	78.17	10	5	5	Carbamidomethylation; Deamidation (NQ)	62943	Asparagine--tRNA ligase cytoplasmic OS=Homo sapiens GN=NARS PE=1 SV=1
246	339	sp|O14672|ADA10_HUMAN	78.13	8	5	5	Carbamidomethylation	84142	Disintegrin and metalloproteinase domain-containing protein 10 OS=Homo sapiens GN=ADAM10 PE=1 SV=1
413	384	sp|P23458|JAK1_HUMAN	70.84	7	5	5		133277	Tyrosine-protein kinase JAK1 OS=Homo sapiens GN=JAK1 PE=1 SV=2
410	439	sp|P36269|GGT5_HUMAN	69.77	9	5	5		62261	Gamma-glutamyltransferase 5 OS=Homo sapiens GN=GGT5 PE=1 SV=2
446	354	sp|P12821|ACE_HUMAN	69.55	4	5	5	Carbamidomethylation	149714	Angiotensin-converting enzyme OS=Homo sapiens GN=ACE PE=1 SV=1
241	309	sp|Q5ZPR3|CD276_HUMAN	122.61	15	5	4	Carbamidomethylation	57236	CD276 antigen OS=Homo sapiens GN=CD276 PE=1 SV=1
195	359	sp|Q9NQC3|RTN4_HUMAN	99.43	6	5	4	Carbamidomethylation	129931	Reticulon-4 OS=Homo sapiens GN=RTN4 PE=1 SV=2
306	261	sp|Q06830|PRDX1_HUMAN	99.02	32	5	4	Carbamidomethylation	22110	Peroxiredoxin-1 OS=Homo sapiens GN=PRDX1 PE=1 SV=1
277	355	sp|P07602|SAP_HUMAN	95.78	11	5	4	Carbamidomethylation	58113	Prosaposin OS=Homo sapiens GN=PSAP PE=1 SV=2
428	371	sp|Q9BXX0|EMIL2_HUMAN	95.24	7	5	4	Oxidation (M)	115687	EMILIN-2 OS=Homo sapiens GN=EMILIN2 PE=1 SV=3
301	326	sp|P06396|GELS_HUMAN	91.38	6	5	4	Carbamidomethylation	85697	Gelsolin OS=Homo sapiens GN=GSN PE=1 SV=1
353	352	sp|Q16851|UGPA_HUMAN	90.79	11	5	4		56940	UTP--glucose-1-phosphate uridylyltransferase OS=Homo sapiens GN=UGP2 PE=1 SV=5
397	387	sp|P48643|TCPE_HUMAN	90.4	12	5	4	Carbamidomethylation; Phosphorylation (STY)	59671	T-complex protein 1 subunit epsilon OS=Homo sapiens GN=CCT5 PE=1 SV=1
358	313	sp|P35221|CTNA1_HUMAN	87.31	7	5	4		100071	Catenin alpha-1 OS=Homo sapiens GN=CTNNA1 PE=1 SV=1
249	312	sp|P54709|AT1B3_HUMAN	86.78	20	5	4		31513	Sodium/potassium-transporting ATPase subunit beta-3 OS=Homo sapiens GN=ATP1B3 PE=1 SV=1
330	414	sp|O15269|SPTC1_HUMAN	84.87	14	5	4	Deamidation (NQ); Phosphorylation (STY)	52744	Serine palmitoyltransferase 1 OS=Homo sapiens GN=SPTLC1 PE=1 SV=1
340	310	sp|P27797|CALR_HUMAN	84.86	13	5	4		48142	Calreticulin OS=Homo sapiens GN=CALR PE=1 SV=1
273	422	sp|Q14344|GNA13_HUMAN	83.88	17	5	4	Carbamidomethylation	44050	Guanine nucleotide-binding protein subunit alpha-13 OS=Homo sapiens GN=GNA13 PE=1 SV=2
326	463	sp|Q9BZQ8|NIBAN_HUMAN	83.82	5	5	4	Deamidation (NQ)	103135	Protein Niban OS=Homo sapiens GN=FAM129A PE=1 SV=1
294	347	sp|Q8WUJ3|CEMIP_HUMAN	81.25	4	5	4		152997	Cell migration-inducing and hyaluronan-binding protein OS=Homo sapiens GN=CEMIP PE=1 SV=2
354	394	sp|P55786|PSA_HUMAN	73.21	6	5	4		103276	Puromycin-sensitive aminopeptidase OS=Homo sapiens GN=NPEPPS PE=1 SV=2
261	341	sp|Q06033|ITIH3_HUMAN	67.79	6	5	4	Deamidation (NQ)	99849	Inter-alpha-trypsin inhibitor heavy chain H3 OS=Homo sapiens GN=ITIH3 PE=1 SV=2
482	479	sp|P25788|PSA3_HUMAN	52.76	16	5	4		28433	Proteasome subunit alpha type-3 OS=Homo sapiens GN=PSMA3 PE=1 SV=2
420	547	sp|Q96AC1|FERM2_HUMAN	45.01	8	5	4	Carbamidomethylation; Deamidation (NQ); Oxidation (M)	77861	Fermitin family homolog 2 OS=Homo sapiens GN=FERMT2 PE=1 SV=1
244	263	sp|P31946|1433B_HUMAN	91.64	28	5	3	Deamidation (NQ)	28082	14-3-3 protein beta/alpha OS=Homo sapiens GN=YWHAB PE=1 SV=3
365	380	sp|Q14195|DPYL3_HUMAN	90.23	10	5	3	Carbamidomethylation; Deamidation (NQ)	61963	Dihydropyrimidinase-related protein 3 OS=Homo sapiens GN=DPYSL3 PE=1 SV=1
295	386	sp|Q92626|PXDN_HUMAN	87.26	4	5	3	Phosphorylation (STY)	165274	Peroxidasin homolog OS=Homo sapiens GN=PXDN PE=1 SV=2
352	378	sp|Q14974|IMB1_HUMAN	86.03	6	5	3		97170	Importin subunit beta-1 OS=Homo sapiens GN=KPNB1 PE=1 SV=2
387	501	sp|Q9P265|DIP2B_HUMAN	67.46	3	5	3	Carbamidomethylation; Deamidation (NQ)	171491	Disco-interacting protein 2 homolog B OS=Homo sapiens GN=DIP2B PE=1 SV=3
366	436	sp|P50148|GNAQ_HUMAN	61.08	19	5	3	Carbamidomethylation; Deamidation (NQ); Phosphorylation (STY)	42142	Guanine nucleotide-binding protein G(q) subunit alpha OS=Homo sapiens GN=GNAQ PE=1 SV=4
356	434	sp|P40227|TCPZ_HUMAN	57.82	9	5	3	Deamidation (NQ)	58024	T-complex protein 1 subunit zeta OS=Homo sapiens GN=CCT6A PE=1 SV=3
336	300	sp|Q9NVJ2|ARL8B_HUMAN	84.45	31	5	2		21539	ADP-ribosylation factor-like protein 8B OS=Homo sapiens GN=ARL8B PE=1 SV=1
333	343	sp|P61020|RAB5B_HUMAN	83.19	25	5	2	Oxidation (M)	23707	Ras-related protein Rab-5B OS=Homo sapiens GN=RAB5B PE=1 SV=1
274	375	sp|P20339|RAB5A_HUMAN	78.57	27	5	2	Oxidation (M); Phosphorylation (STY)	23659	Ras-related protein Rab-5A OS=Homo sapiens GN=RAB5A PE=1 SV=2
208	446	sp|P11717|MPRI_HUMAN	69.13	2	5	2	Carbamidomethylation; Deamidation (NQ)	274373	Cation-independent mannose-6-phosphate receptor OS=Homo sapiens GN=IGF2R PE=1 SV=3
427	607	sp|Q9UKX3|MYH13_HUMAN	63.57	3	5	2	Deamidation (NQ); Phosphorylation (STY)	223603	Myosin-13 OS=Homo sapiens GN=MYH13 PE=2 SV=2
188	332	sp|P61006|RAB8A_HUMAN	90.36	25	5	1		23668	Ras-related protein Rab-8A OS=Homo sapiens GN=RAB8A PE=1 SV=1
191	351	sp|Q92930|RAB8B_HUMAN	89.37	25	5	1		23584	Ras-related protein Rab-8B OS=Homo sapiens GN=RAB8B PE=1 SV=2
257	451	sp|P19012|K1C15_HUMAN	72.87	14	5	1	Oxidation (M); Phosphorylation (STY)	49212	Keratin type I cytoskeletal 15 OS=Homo sapiens GN=KRT15 PE=1 SV=3
213	489	sp|Q3SY84|K2C71_HUMAN	69.76	6	5	1	Deamidation (NQ)	57292	Keratin type II cytoskeletal 71 OS=Homo sapiens GN=KRT71 PE=1 SV=3
393	787	sp|Q8IZC6|CORA1_HUMAN	45.15	2	5	1	Deamidation (NQ)	186891	Collagen alpha-1(XXVII) chain OS=Homo sapiens GN=COL27A1 PE=1 SV=1
292	317	sp|P13796|PLSL_HUMAN	84.35	7	5	0	Carbamidomethylation; Deamidation (NQ)	70289	Plastin-2 OS=Homo sapiens GN=LCP1 PE=1 SV=6
389	2835	sp|Q9UPN3|MACF1_HUMAN	45.96	0	5	0		838323	Microtubule-actin cross-linking factor 1 isoforms 1/2/3/5 OS=Homo sapiens GN=MACF1 PE=1 SV=4
242	314	sp|Q9C0H2|TTYH3_HUMAN	112.65	10	4	4	Oxidation (M)	57545	Protein tweety homolog 3 OS=Homo sapiens GN=TTYH3 PE=1 SV=3
235	405	sp|P04216|THY1_HUMAN	111.32	25	4	4	Carbamidomethylation	17935	Thy-1 membrane glycoprotein OS=Homo sapiens GN=THY1 PE=1 SV=2
183	348	sp|P13473|LAMP2_HUMAN	103.23	11	4	4	Deamidation (NQ)	44961	Lysosome-associated membrane glycoprotein 2 OS=Homo sapiens GN=LAMP2 PE=1 SV=2
361	307	sp|Q15084|PDIA6_HUMAN	97.74	13	4	4		48121	Protein disulfide-isomerase A6 OS=Homo sapiens GN=PDIA6 PE=1 SV=1
405	482	sp|P00558|PGK1_HUMAN	91.28	10	4	4	Deamidation (NQ)	44615	Phosphoglycerate kinase 1 OS=Homo sapiens GN=PGK1 PE=1 SV=3
307	327	sp|P09382|LEG1_HUMAN	90.58	32	4	4	Carbamidomethylation; Deamidation (NQ)	14716	Galectin-1 OS=Homo sapiens GN=LGALS1 PE=1 SV=2
190	344	sp|Q96S97|MYADM_HUMAN	88.22	16	4	4	Carbamidomethylation; Oxidation (M)	35274	Myeloid-associated differentiation marker OS=Homo sapiens GN=MYADM PE=1 SV=2
432	337	sp|P06744|G6PI_HUMAN	88.19	11	4	4		63147	Glucose-6-phosphate isomerase OS=Homo sapiens GN=GPI PE=1 SV=4
355	364	sp|P50454|SERPH_HUMAN	86.71	13	4	4		46441	Serpin H1 OS=Homo sapiens GN=SERPINH1 PE=1 SV=2
374	529	sp|P34810|CD68_HUMAN	85.53	10	4	4	Carbamidomethylation; Deamidation (NQ)	37408	Macrosialin OS=Homo sapiens GN=CD68 PE=1 SV=2
331	358	sp|P23284|PPIB_HUMAN	85.49	20	4	4		23743	Peptidyl-prolyl cis-trans isomerase B OS=Homo sapiens GN=PPIB PE=1 SV=2
342	458	sp|P21926|CD9_HUMAN	84.84	21	4	4	Carbamidomethylation	25416	CD9 antigen OS=Homo sapiens GN=CD9 PE=1 SV=4
262	409	sp|Q9NRX5|SERC1_HUMAN	84	10	4	4	Carbamidomethylation	50495	Serine incorporator 1 OS=Homo sapiens GN=SERINC1 PE=1 SV=1
439	335	sp|Q9Y4K0|LOXL2_HUMAN	83.52	8	4	4	Carbamidomethylation	86725	Lysyl oxidase homolog 2 OS=Homo sapiens GN=LOXL2 PE=1 SV=1
247	447	sp|P02794|FRIH_HUMAN	80.83	31	4	4	Carbamidomethylation	21226	Ferritin heavy chain OS=Homo sapiens GN=FTH1 PE=1 SV=2
475	333	sp|P23142|FBLN1_HUMAN	80.58	7	4	4	Carbamidomethylation	77214	Fibulin-1 OS=Homo sapiens GN=FBLN1 PE=1 SV=4
509	363	sp|Q8NC42|RN149_HUMAN	80.26	12	4	4	Carbamidomethylation	43165	E3 ubiquitin-protein ligase RNF149 OS=Homo sapiens GN=RNF149 PE=2 SV=2
362	338	sp|P00736|C1R_HUMAN	80.17	7	4	4	Carbamidomethylation	80119	Complement C1r subcomponent OS=Homo sapiens GN=C1R PE=1 SV=2
433	416	sp|P10809|CH60_HUMAN	78.31	10	4	4	Carbamidomethylation; Oxidation (M)	61055	60 kDa heat shock protein mitochondrial OS=Homo sapiens GN=HSPD1 PE=1 SV=2
359	323	sp|P31689|DNJA1_HUMAN	77.84	13	4	4	Deamidation (NQ)	44868	DnaJ homolog subfamily A member 1 OS=Homo sapiens GN=DNAJA1 PE=1 SV=2
403	345	sp|P60842|IF4A1_HUMAN	76.66	12	4	4		46154	Eukaryotic initiation factor 4A-I OS=Homo sapiens GN=EIF4A1 PE=1 SV=1
468	374	sp|P23526|SAHH_HUMAN	75.95	11	4	4		47716	Adenosylhomocysteinase OS=Homo sapiens GN=AHCY PE=1 SV=4
345	466	sp|O00299|CLIC1_HUMAN	72.54	20	4	4	Carbamidomethylation; Deamidation (NQ)	26923	Chloride intracellular channel protein 1 OS=Homo sapiens GN=CLIC1 PE=1 SV=4
470	428	sp|P98095|FBLN2_HUMAN	70.4	5	4	4	Carbamidomethylation	126573	Fibulin-2 OS=Homo sapiens GN=FBLN2 PE=1 SV=2
337	507	sp|Q03135|CAV1_HUMAN	68.27	30	4	4	Carbamidomethylation	20472	Caveolin-1 OS=Homo sapiens GN=CAV1 PE=1 SV=4
476	370	sp|Q4KMQ2|ANO6_HUMAN	67.49	5	4	4	Carbamidomethylation	106165	Anoctamin-6 OS=Homo sapiens GN=ANO6 PE=1 SV=2
441	424	sp|P22314|UBA1_HUMAN	66.63	7	4	4		117849	Ubiquitin-like modifier-activating enzyme 1 OS=Homo sapiens GN=UBA1 PE=1 SV=3
369	373	sp|Q01995|TAGL_HUMAN	66.57	23	4	4		22611	Transgelin OS=Homo sapiens GN=TAGLN PE=1 SV=4
552	469	sp|P43490|NAMPT_HUMAN	65.87	14	4	4		55521	Nicotinamide phosphoribosyltransferase OS=Homo sapiens GN=NAMPT PE=1 SV=1
313	432	sp|Q96AM1|MRGRF_HUMAN	64.7	16	4	4	Carbamidomethylation; Oxidation (M)	38171	Mas-related G-protein coupled receptor member F OS=Homo sapiens GN=MRGPRF PE=2 SV=1
452	438	sp|Q15036|SNX17_HUMAN	57.53	13	4	4		52901	Sorting nexin-17 OS=Homo sapiens GN=SNX17 PE=1 SV=1
455	486	sp|Q96TA1|NIBL1_HUMAN	51.05	6	4	4	Deamidation (NQ)	84138	Niban-like protein 1 OS=Homo sapiens GN=FAM129B PE=1 SV=3
464	465	sp|O95967|FBLN4_HUMAN	48.93	11	4	4	Carbamidomethylation	49405	EGF-containing fibulin-like extracellular matrix protein 2 OS=Homo sapiens GN=EFEMP2 PE=1 SV=3
457	503	sp|P28838|AMPL_HUMAN	43.15	12	4	4	Carbamidomethylation	56166	Cytosol aminopeptidase OS=Homo sapiens GN=LAP3 PE=1 SV=3
481	361	sp|Q9H4G4|GAPR1_HUMAN	95.93	31	4	3	Carbamidomethylation	17218	Golgi-associated plant pathogenesis-related protein 1 OS=Homo sapiens GN=GLIPR2 PE=1 SV=3
451	440	sp|Q99571|P2RX4_HUMAN	82.54	8	4	3	Carbamidomethylation	43369	P2X purinoceptor 4 OS=Homo sapiens GN=P2RX4 PE=1 SV=2
532	474	sp|P08294|SODE_HUMAN	80.98	19	4	3	Carbamidomethylation; Deamidation (NQ)	25851	Extracellular superoxide dismutase [Cu-Zn] OS=Homo sapiens GN=SOD3 PE=1 SV=2
435	372	sp|P07339|CATD_HUMAN	80.8	9	4	3		44552	Cathepsin D OS=Homo sapiens GN=CTSD PE=1 SV=1
118	411	sp|P68871|HBB_HUMAN	80.66	27	4	3	Phosphorylation (STY)	15998	Hemoglobin subunit beta OS=Homo sapiens GN=HBB PE=1 SV=2
465	471	sp|Q8IZ83|A16A1_HUMAN	78.67	6	4	3	Deamidation (NQ)	85127	Aldehyde dehydrogenase family 16 member A1 OS=Homo sapiens GN=ALDH16A1 PE=1 SV=2
402	510	sp|O75874|IDHC_HUMAN	74.95	9	4	3	Deamidation (NQ); Phosphorylation (STY)	46659	Isocitrate dehydrogenase [NADP] cytoplasmic OS=Homo sapiens GN=IDH1 PE=1 SV=2
409	429	sp|P18085|ARF4_HUMAN	67.29	24	4	3	Carbamidomethylation	20511	ADP-ribosylation factor 4 OS=Homo sapiens GN=ARF4 PE=1 SV=3
493	661	sp|Q9UIQ6|LCAP_HUMAN	67.02	5	4	3	Deamidation (NQ); Phosphorylation (STY)	117349	Leucyl-cystinyl aminopeptidase OS=Homo sapiens GN=LNPEP PE=1 SV=3
305	403	sp|Q96FN4|CPNE2_HUMAN	65.04	8	4	3		61190	Copine-2 OS=Homo sapiens GN=CPNE2 PE=1 SV=3
525	408	sp|P53990|IST1_HUMAN	61.82	10	4	3	Carbamidomethylation	39751	IST1 homolog OS=Homo sapiens GN=IST1 PE=1 SV=1
578	453	sp|Q7Z4F1|LRP10_HUMAN	60.22	8	4	3		76193	Low-density lipoprotein receptor-related protein 10 OS=Homo sapiens GN=LRP10 PE=1 SV=2
551	461	sp|P15531|NDKA_HUMAN	59.24	23	4	3	Carbamidomethylation	17149	Nucleoside diphosphate kinase A OS=Homo sapiens GN=NME1 PE=1 SV=1
540	481	sp|Q9Y265|RUVB1_HUMAN	49.45	10	4	3	Carbamidomethylation	50228	RuvB-like 1 OS=Homo sapiens GN=RUVBL1 PE=1 SV=1
423	983	sp|Q8WXH0|SYNE2_HUMAN	35.65	1	4	3	Deamidation (NQ)	796457	Nesprin-2 OS=Homo sapiens GN=SYNE2 PE=1 SV=3
193	329	sp|P61026|RAB10_HUMAN	90.53	22	4	2		22541	Ras-related protein Rab-10 OS=Homo sapiens GN=RAB10 PE=1 SV=1
442	490	sp|P02774|VTDB_HUMAN	83.21	10	4	2	Carbamidomethylation; Phosphorylation (STY)	52964	Vitamin D-binding protein OS=Homo sapiens GN=GC PE=1 SV=1
404	390	sp|P84077|ARF1_HUMAN	77.62	22	4	2	Oxidation (M)	20697	ADP-ribosylation factor 1 OS=Homo sapiens GN=ARF1 PE=1 SV=2
404	392	sp|P61204|ARF3_HUMAN	77.62	22	4	2	Oxidation (M)	20601	ADP-ribosylation factor 3 OS=Homo sapiens GN=ARF3 PE=1 SV=2
265	365	sp|P61981|1433G_HUMAN	77.52	17	4	2	Deamidation (NQ)	28303	14-3-3 protein gamma OS=Homo sapiens GN=YWHAG PE=1 SV=2
308	346	sp|Q04917|1433F_HUMAN	76.21	19	4	2	Carbamidomethylation; Deamidation (NQ)	28219	14-3-3 protein eta OS=Homo sapiens GN=YWHAH PE=1 SV=4
321	491	sp|O75369|FLNB_HUMAN	63.54	2	4	2	Deamidation (NQ)	278162	Filamin-B OS=Homo sapiens GN=FLNB PE=1 SV=2
283	521	sp|O14828|SCAM3_HUMAN	63.25	12	4	2		38287	Secretory carrier-associated membrane protein 3 OS=Homo sapiens GN=SCAMP3 PE=1 SV=3
516	483	sp|P14923|PLAK_HUMAN	60.93	9	4	2	Carbamidomethylation; Oxidation (M)	81745	Junction plakoglobin OS=Homo sapiens GN=JUP PE=1 SV=3
522	615	sp|P16615|AT2A2_HUMAN	44.9	4	4	2	Deamidation (NQ)	114757	Sarcoplasmic/endoplasmic reticulum calcium ATPase 2 OS=Homo sapiens GN=ATP2A2 PE=1 SV=1
245	448	sp|P09104|ENOG_HUMAN	94.4	12	4	1		47269	Gamma-enolase OS=Homo sapiens GN=ENO2 PE=1 SV=3
250	368	sp|Q9HAV0|GBB4_HUMAN	87.71	19	4	1	Carbamidomethylation	37567	Guanine nucleotide-binding protein subunit beta-4 OS=Homo sapiens GN=GNB4 PE=1 SV=3
278	369	sp|P51148|RAB5C_HUMAN	87.43	21	4	1	Oxidation (M)	23483	Ras-related protein Rab-5C OS=Homo sapiens GN=RAB5C PE=1 SV=2
167	376	sp|Q9H4B7|TBB1_HUMAN	84.41	9	4	1	Carbamidomethylation; Oxidation (M)	50327	Tubulin beta-1 chain OS=Homo sapiens GN=TUBB1 PE=1 SV=1
271	413	sp|P19013|K2C4_HUMAN	78.66	7	4	1	Phosphorylation (STY)	57285	Keratin type II cytoskeletal 4 OS=Homo sapiens GN=KRT4 PE=1 SV=4
346	492	sp|Q7Z406|MYH14_HUMAN	69.82	2	4	1	Deamidation (NQ)	227868	Myosin-14 OS=Homo sapiens GN=MYH14 PE=1 SV=2
293	587	sp|Q8N1N4|K2C78_HUMAN	62.09	4	4	1		56866	Keratin type II cytoskeletal 78 OS=Homo sapiens GN=KRT78 PE=1 SV=2
133	488	sp|P13646|K1C13_HUMAN	82.04	7	4	0	Deamidation (NQ)	49588	Keratin type I cytoskeletal 13 OS=Homo sapiens GN=KRT13 PE=1 SV=4
418	435	sp|Q96BM9|ARL8A_HUMAN	68.83	22	4	0		21416	ADP-ribosylation factor-like protein 8A OS=Homo sapiens GN=ARL8A PE=1 SV=1
343	468	sp|Q9HCH3|CPNE5_HUMAN	65.32	6	4	0		65734	Copine-5 OS=Homo sapiens GN=CPNE5 PE=1 SV=2
521	495	sp|P08727|K1C19_HUMAN	49.2	8	4	0		44106	Keratin type I cytoskeletal 19 OS=Homo sapiens GN=KRT19 PE=1 SV=4
512	1146	sp|Q9Y3R5|DOP2_HUMAN	44.64	1	4	0	Deamidation (NQ)	258227	Protein dopey-2 OS=Homo sapiens GN=DOPEY2 PE=1 SV=5
545	994	sp|P01031|CO5_HUMAN	44.31	1	4	0		188304	Complement C5 OS=Homo sapiens GN=C5 PE=1 SV=4
424	2868	sp|Q8WXI7|MUC16_HUMAN	42.87	0	4	0		1519216	Mucin-16 OS=Homo sapiens GN=MUC16 PE=1 SV=3
384	3284	sp|Q7Z5P9|MUC19_HUMAN	42.62	0	4	0	Phosphorylation (STY)	805275	Mucin-19 OS=Homo sapiens GN=MUC19 PE=1 SV=3
496	3602	sp|Q12955|ANK3_HUMAN	42.34	0	4	0	Oxidation (M)	480416	Ankyrin-3 OS=Homo sapiens GN=ANK3 PE=1 SV=3
572	1218	sp|Q9Y2L1|RRP44_HUMAN	41.32	2	4	0		109003	Exosome complex exonuclease RRP44 OS=Homo sapiens GN=DIS3 PE=1 SV=2
558	858	sp|Q9BVS4|RIOK2_HUMAN	40.99	4	4	0	Phosphorylation (STY)	63283	Serine/threonine-protein kinase RIO2 OS=Homo sapiens GN=RIOK2 PE=1 SV=2
546	1053	sp|A0A096LP49|CC187_HUMAN	40.72	2	4	0		114856	Coiled-coil domain-containing protein 187 OS=Homo sapiens GN=CCDC187 PE=2 SV=1
562	5277	sp|Q8IVG5|SAM9L_HUMAN	37.84	1	4	0		184531	Sterile alpha motif domain-containing protein 9-like OS=Homo sapiens GN=SAMD9L PE=1 SV=2
535	1776	sp|B1ANS9|WDR64_HUMAN	36.89	2	4	0	Phosphorylation (STY)	123631	WD repeat-containing protein 64 OS=Homo sapiens GN=WDR64 PE=2 SV=1
495	3573	sp|Q14517|FAT1_HUMAN	33.91	0	4	0	Oxidation (M); Phosphorylation (STY)	506278	Protocadherin Fat 1 OS=Homo sapiens GN=FAT1 PE=1 SV=2
296	473	sp|Q15043|S39AE_HUMAN	89.85	9	3	3	Carbamidomethylation	54212	Zinc transporter ZIP14 OS=Homo sapiens GN=SLC39A14 PE=1 SV=3
416	395	sp|P13987|CD59_HUMAN	88.67	30	3	3	Carbamidomethylation	14177	CD59 glycoprotein OS=Homo sapiens GN=CD59 PE=1 SV=1
351	431	sp|P54289|CA2D1_HUMAN	87.48	4	3	3		124568	Voltage-dependent calcium channel subunit alpha-2/delta-1 OS=Homo sapiens GN=CACNA2D1 PE=1 SV=3
258	433	sp|Q4V9L6|TM119_HUMAN	86.9	14	3	3		29203	Transmembrane protein 119 OS=Homo sapiens GN=TMEM119 PE=1 SV=1
461	393	sp|P04179|SODM_HUMAN	86.45	19	3	3		24722	Superoxide dismutase [Mn] mitochondrial OS=Homo sapiens GN=SOD2 PE=1 SV=2
450	400	sp|P60900|PSA6_HUMAN	84.76	14	3	3		27399	Proteasome subunit alpha type-6 OS=Homo sapiens GN=PSMA6 PE=1 SV=1
554	475	sp|P29966|MARCS_HUMAN	81.17	17	3	3		31555	Myristoylated alanine-rich C-kinase substrate OS=Homo sapiens GN=MARCKS PE=1 SV=4
378	571	sp|P02792|FRIL_HUMAN	80.54	18	3	3		20020	Ferritin light chain OS=Homo sapiens GN=FTL PE=1 SV=2
341	396	sp|P00734|THRB_HUMAN	79.67	5	3	3	Carbamidomethylation	70037	Prothrombin OS=Homo sapiens GN=F2 PE=1 SV=2
539	419	sp|P28074|PSB5_HUMAN	79.25	14	3	3		28480	Proteasome subunit beta type-5 OS=Homo sapiens GN=PSMB5 PE=1 SV=3
300	402	sp|Q9Y625|GPC6_HUMAN	78.6	7	3	3		62736	Glypican-6 OS=Homo sapiens GN=GPC6 PE=1 SV=1
477	441	sp|P04080|CYTB_HUMAN	77.91	46	3	3		11140	Cystatin-B OS=Homo sapiens GN=CSTB PE=1 SV=2
408	404	sp|Q07960|RHG01_HUMAN	76.83	11	3	3	Deamidation (NQ)	50436	Rho GTPase-activating protein 1 OS=Homo sapiens GN=ARHGAP1 PE=1 SV=1
550	462	sp|P60660|MYL6_HUMAN	76.65	23	3	3		16930	Myosin light polypeptide 6 OS=Homo sapiens GN=MYL6 PE=1 SV=2
453	477	sp|P12955|PEPD_HUMAN	74.33	7	3	3	Carbamidomethylation	54548	Xaa-Pro dipeptidase OS=Homo sapiens GN=PEPD PE=1 SV=3
462	442	sp|P26641|EF1G_HUMAN	73.67	7	3	3		50119	Elongation factor 1-gamma OS=Homo sapiens GN=EEF1G PE=1 SV=3
376	425	sp|O75340|PDCD6_HUMAN	72.19	17	3	3		21868	Programmed cell death protein 6 OS=Homo sapiens GN=PDCD6 PE=1 SV=1
399	381	sp|P58335|ANTR2_HUMAN	70.56	7	3	3		53666	Anthrax toxin receptor 2 OS=Homo sapiens GN=ANTXR2 PE=1 SV=5
456	631	sp|P16152|CBR1_HUMAN	69.74	12	3	3	Deamidation (NQ)	30375	Carbonyl reductase [NADPH] 1 OS=Homo sapiens GN=CBR1 PE=1 SV=3
125	612	sp|P08962|CD63_HUMAN	69.14	8	3	3	Deamidation (NQ); Oxidation (M)	25637	CD63 antigen OS=Homo sapiens GN=CD63 PE=1 SV=2
317	418	sp|P17931|LEG3_HUMAN	68.84	15	3	3		26152	Galectin-3 OS=Homo sapiens GN=LGALS3 PE=1 SV=5
471	470	sp|P36957|ODO2_HUMAN	66.72	10	3	3		48755	Dihydrolipoyllysine-residue succinyltransferase component of 2-oxoglutarate dehydrogenase complex mitochondrial OS=Homo sapiens GN=DLST PE=1 SV=4
463	472	sp|Q9Y287|ITM2B_HUMAN	66.49	14	3	3	Carbamidomethylation	30338	Integral membrane protein 2B OS=Homo sapiens GN=ITM2B PE=1 SV=1
537	412	sp|P13489|RINI_HUMAN	65.63	7	3	3	Carbamidomethylation	49974	Ribonuclease inhibitor OS=Homo sapiens GN=RNH1 PE=1 SV=2
650	460	sp|Q9UP95|S12A4_HUMAN	62.63	3	3	3		120650	Solute carrier family 12 member 4 OS=Homo sapiens GN=SLC12A4 PE=1 SV=2
510	467	sp|P31939|PUR9_HUMAN	62.6	7	3	3	Deamidation (NQ)	64616	Bifunctional purine biosynthesis protein PURH OS=Homo sapiens GN=ATIC PE=1 SV=3
417	430	sp|P59998|ARPC4_HUMAN	62.26	16	3	3		19667	Actin-related protein 2/3 complex subunit 4 OS=Homo sapiens GN=ARPC4 PE=1 SV=3
454	454	sp|O95980|RECK_HUMAN	60.83	4	3	3	Carbamidomethylation	106457	Reversion-inducing cysteine-rich protein with Kazal motifs OS=Homo sapiens GN=RECK PE=1 SV=1
564	455	sp|O95865|DDAH2_HUMAN	60.4	12	3	3		29644	N(G) N(G)-dimethylarginine dimethylaminohydrolase 2 OS=Homo sapiens GN=DDAH2 PE=1 SV=1
549	421	sp|Q13308|PTK7_HUMAN	59.95	4	3	3		118392	Inactive tyrosine-protein kinase 7 OS=Homo sapiens GN=PTK7 PE=1 SV=2
503	667	sp|Q6NZI2|CAVN1_HUMAN	58.45	11	3	3	Phosphorylation (STY)	43476	Caveolae-associated protein 1 OS=Homo sapiens GN=CAVIN1 PE=1 SV=1
706	485	sp|Q12846|STX4_HUMAN	58.26	13	3	3		34180	Syntaxin-4 OS=Homo sapiens GN=STX4 PE=1 SV=2
538	450	sp|P29373|RABP2_HUMAN	57.38	22	3	3		15693	Cellular retinoic acid-binding protein 2 OS=Homo sapiens GN=CRABP2 PE=1 SV=2
608	502	sp|O95782|AP2A1_HUMAN	55.72	5	3	3	Carbamidomethylation	107546	AP-2 complex subunit alpha-1 OS=Homo sapiens GN=AP2A1 PE=1 SV=3
786	449	sp|O15144|ARPC2_HUMAN	50.16	11	3	3	Carbamidomethylation	34333	Actin-related protein 2/3 complex subunit 2 OS=Homo sapiens GN=ARPC2 PE=1 SV=1
542	499	sp|Q9Y5X1|SNX9_HUMAN	49.6	7	3	3		66592	Sorting nexin-9 OS=Homo sapiens GN=SNX9 PE=1 SV=1
740	478	sp|Q99460|PSMD1_HUMAN	45.22	4	3	3	Carbamidomethylation	105836	26S proteasome non-ATPase regulatory subunit 1 OS=Homo sapiens GN=PSMD1 PE=1 SV=2
722	500	sp|Q6P9B6|TLDC1_HUMAN	44.81	7	3	3		50994	TLD domain-containing protein 1 OS=Homo sapiens GN=TLDC1 PE=1 SV=2
556	505	sp|Q13425|SNTB2_HUMAN	42.96	7	3	3	Carbamidomethylation	57950	Beta-2-syntrophin OS=Homo sapiens GN=SNTB2 PE=1 SV=1
790	618	sp|P55209|NP1L1_HUMAN	37.54	10	3	3		45374	Nucleosome assembly protein 1-like 1 OS=Homo sapiens GN=NAP1L1 PE=1 SV=1
748	617	sp|Q04446|GLGB_HUMAN	37.02	6	3	3		80474	1 4-alpha-glucan-branching enzyme OS=Homo sapiens GN=GBE1 PE=1 SV=3
529	601	sp|Q86VP6|CAND1_HUMAN	35.43	3	3	3		136375	Cullin-associated NEDD8-dissociated protein 1 OS=Homo sapiens GN=CAND1 PE=1 SV=2
327	544	sp|P02788|TRFL_HUMAN	78.93	4	3	2	Carbamidomethylation; Phosphorylation (STY)	78182	Lactotransferrin OS=Homo sapiens GN=LTF PE=1 SV=6
601	652	sp|Q13219|PAPP1_HUMAN	71.71	2	3	2	Deamidation (NQ)	180972	Pappalysin-1 OS=Homo sapiens GN=PAPPA PE=1 SV=3
472	484	sp|P20618|PSB1_HUMAN	69.34	12	3	2		26489	Proteasome subunit beta type-1 OS=Homo sapiens GN=PSMB1 PE=1 SV=2
372	506	sp|P04004|VTNC_HUMAN	66.63	6	3	2		54306	Vitronectin OS=Homo sapiens GN=VTN PE=1 SV=1
436	528	sp|Q15907|RB11B_HUMAN	65.77	12	3	2		24488	Ras-related protein Rab-11B OS=Homo sapiens GN=RAB11B PE=1 SV=4
436	526	sp|P62491|RB11A_HUMAN	65.77	12	3	2		24394	Ras-related protein Rab-11A OS=Homo sapiens GN=RAB11A PE=1 SV=3
511	558	sp|P17813|EGLN_HUMAN	63.42	5	3	2	Carbamidomethylation; Phosphorylation (STY)	70578	Endoglin OS=Homo sapiens GN=ENG PE=1 SV=2
502	508	sp|P53618|COPB_HUMAN	62.03	3	3	2		107142	Coatomer subunit beta OS=Homo sapiens GN=COPB1 PE=1 SV=3
533	509	sp|Q76M96|CCD80_HUMAN	59.74	3	3	2		108174	Coiled-coil domain-containing protein 80 OS=Homo sapiens GN=CCDC80 PE=1 SV=1
379	517	sp|P51153|RAB13_HUMAN	58.89	14	3	2	Carbamidomethylation	22774	Ras-related protein Rab-13 OS=Homo sapiens GN=RAB13 PE=1 SV=1
762	512	sp|Q68CP4|HGNAT_HUMAN	57.69	5	3	2		73294	Heparan-alpha-glucosaminide N-acetyltransferase OS=Homo sapiens GN=HGSNAT PE=1 SV=2
710	634	sp|P34932|HSP74_HUMAN	49.21	4	3	2	Carbamidomethylation; Phosphorylation (STY)	94331	Heat shock 70 kDa protein 4 OS=Homo sapiens GN=HSPA4 PE=1 SV=4
557	602	sp|P54577|SYYC_HUMAN	46.35	5	3	2	Deamidation (NQ); Phosphorylation (STY)	59144	Tyrosine--tRNA ligase cytoplasmic OS=Homo sapiens GN=YARS PE=1 SV=4
553	511	sp|P27824|CALX_HUMAN	44.77	5	3	2		67568	Calnexin OS=Homo sapiens GN=CANX PE=1 SV=2
792	752	sp|P54136|SYRC_HUMAN	42.24	4	3	2	Carbamidomethylation	75379	Arginine--tRNA ligase cytoplasmic OS=Homo sapiens GN=RARS PE=1 SV=2
764	656	sp|P36871|PGM1_HUMAN	41.44	4	3	2		61449	Phosphoglucomutase-1 OS=Homo sapiens GN=PGM1 PE=1 SV=3
579	633	sp|P49591|SYSC_HUMAN	39.06	5	3	2	Carbamidomethylation	58777	Serine--tRNA ligase cytoplasmic OS=Homo sapiens GN=SARS PE=1 SV=3
203	401	sp|Q15286|RAB35_HUMAN	81.62	14	3	1		23025	Ras-related protein Rab-35 OS=Homo sapiens GN=RAB35 PE=1 SV=1
221	410	sp|P17693|HLAG_HUMAN	66.99	11	3	1		38224	HLA class I histocompatibility antigen alpha chain G OS=Homo sapiens GN=HLA-G PE=1 SV=1
480	611	sp|P01112|RASH_HUMAN	63.81	12	3	1		21298	GTPase HRas OS=Homo sapiens GN=HRAS PE=1 SV=1
480	650	sp|P01111|RASN_HUMAN	63.81	12	3	1		21229	GTPase NRas OS=Homo sapiens GN=NRAS PE=1 SV=1
469	420	sp|P61225|RAP2B_HUMAN	61.25	17	3	1		20504	Ras-related protein Rap-2b OS=Homo sapiens GN=RAP2B PE=1 SV=1
478	535	sp|O75351|VPS4B_HUMAN	59.29	8	3	1		49302	Vacuolar protein sorting-associated protein 4B OS=Homo sapiens GN=VPS4B PE=1 SV=2
709	533	sp|P62249|RS16_HUMAN	58.87	14	3	1		16445	40S ribosomal protein S16 OS=Homo sapiens GN=RPS16 PE=1 SV=2
325	614	sp|Q9NSB2|KRT84_HUMAN	57.52	3	3	1		64842	Keratin type II cuticular Hb4 OS=Homo sapiens GN=KRT84 PE=2 SV=2
526	527	sp|O14556|G3PT_HUMAN	53.73	8	3	1	Carbamidomethylation; Deamidation (NQ); Phosphorylation (STY)	44501	Glyceraldehyde-3-phosphate dehydrogenase testis-specific OS=Homo sapiens GN=GAPDHS PE=1 SV=2
788	576	sp|Q13492|PICAL_HUMAN	51.05	3	3	1		70755	Phosphatidylinositol-binding clathrin assembly protein OS=Homo sapiens GN=PICALM PE=1 SV=2
746	592	sp|Q9NZW5|MPP6_HUMAN	48.75	4	3	1		61117	MAGUK p55 subfamily member 6 OS=Homo sapiens GN=MPP6 PE=1 SV=2
527	647	sp|P29992|GNA11_HUMAN	45.09	11	3	1	Carbamidomethylation; Deamidation (NQ); Phosphorylation (STY)	42123	Guanine nucleotide-binding protein subunit alpha-11 OS=Homo sapiens GN=GNA11 PE=1 SV=2
793	740	sp|O43688|PLPP2_HUMAN	38.31	8	3	1	Phosphorylation (STY)	32574	Phospholipid phosphatase 2 OS=Homo sapiens GN=PLPP2 PE=1 SV=1
484	809	sp|Q14807|KIF22_HUMAN	37.27	2	3	1	Deamidation (NQ)	73262	Kinesin-like protein KIF22 OS=Homo sapiens GN=KIF22 PE=1 SV=5
507	1777	sp|Q460N5|PAR14_HUMAN	33.15	1	3	1		202799	Poly [ADP-ribose] polymerase 14 OS=Homo sapiens GN=PARP14 PE=1 SV=3
473	662	sp|O95841|ANGL1_HUMAN	66.94	5	3	0	Deamidation (NQ); Phosphorylation (STY)	56720	Angiopoietin-related protein 1 OS=Homo sapiens GN=ANGPTL1 PE=2 SV=1
377	476	sp|Q8IYJ1|CPNE9_HUMAN	62.64	4	3	0	Deamidation (NQ)	61864	Copine-9 OS=Homo sapiens GN=CPNE9 PE=1 SV=3
360	538	sp|Q6KB66|K2C80_HUMAN	59.82	5	3	0		50525	Keratin type II cytoskeletal 80 OS=Homo sapiens GN=KRT80 PE=1 SV=2
459	778	sp|Q9Y6N6|LAMC3_HUMAN	48.44	1	3	0		171227	Laminin subunit gamma-3 OS=Homo sapiens GN=LAMC3 PE=1 SV=3
757	2530	sp|Q92954|PRG4_HUMAN	40.86	1	3	0		151076	Proteoglycan 4 OS=Homo sapiens GN=PRG4 PE=1 SV=2
619	8369	sp|Q15751|HERC1_HUMAN	37.91	0	3	0	Phosphorylation (STY)	532234	Probable E3 ubiquitin-protein ligase HERC1 OS=Homo sapiens GN=HERC1 PE=1 SV=2
519	8002	sp|Q7Z5N4|SDK1_HUMAN	37.73	1	3	0		242109	Protein sidekick-1 OS=Homo sapiens GN=SDK1 PE=2 SV=3
523	1332	sp|Q8NI27|THOC2_HUMAN	37.57	1	3	0		182774	THO complex subunit 2 OS=Homo sapiens GN=THOC2 PE=1 SV=2
727	1098	sp|P25940|CO5A3_HUMAN	37.25	1	3	0		172120	Collagen alpha-3(V) chain OS=Homo sapiens GN=COL5A3 PE=1 SV=3
591	5399	sp|Q9NR09|BIRC6_HUMAN	36.9	0	3	0		530260	Baculoviral IAP repeat-containing protein 6 OS=Homo sapiens GN=BIRC6 PE=1 SV=2
811	1049	sp|Q8NFW1|COMA1_HUMAN	36.86	1	3	0		161145	Collagen alpha-1(XXII) chain OS=Homo sapiens GN=COL22A1 PE=2 SV=2
700	7985	sp|Q14008|CKAP5_HUMAN	36.75	1	3	0		225493	Cytoskeleton-associated protein 5 OS=Homo sapiens GN=CKAP5 PE=1 SV=3
607	3489	sp|Q5THJ4|VP13D_HUMAN	36.53	0	3	0		491920	Vacuolar protein sorting-associated protein 13D OS=Homo sapiens GN=VPS13D PE=1 SV=2
801	1741	sp|Q15111|PLCL1_HUMAN	36.52	1	3	0	Phosphorylation (STY)	122728	Inactive phospholipase C-like protein 1 OS=Homo sapiens GN=PLCL1 PE=1 SV=3
666	8713	sp|O75417|DPOLQ_HUMAN	36.45	1	3	0		289617	DNA polymerase theta OS=Homo sapiens GN=POLQ PE=1 SV=2
669	9791	sp|Q7Z333|SETX_HUMAN	36.21	1	3	0		302879	Probable helicase senataxin OS=Homo sapiens GN=SETX PE=1 SV=4
662	1297	sp|Q9BZA7|PC11X_HUMAN	36.03	1	3	0		147558	Protocadherin-11 X-linked OS=Homo sapiens GN=PCDH11X PE=2 SV=1
515	8971	sp|Q2KJY2|KI26B_HUMAN	35.98	1	3	0		223881	Kinesin-like protein KIF26B OS=Homo sapiens GN=KIF26B PE=2 SV=1
759	4138	sp|Q9ULL1|PKHG1_HUMAN	35.91	1	3	0	Deamidation (NQ); Phosphorylation (STY)	155439	Pleckstrin homology domain-containing family G member 1 OS=Homo sapiens GN=PLEKHG1 PE=1 SV=2
514	3612	sp|Q8N3D4|EH1L1_HUMAN	35.72	1	3	0	Phosphorylation (STY)	161854	EH domain-binding protein 1-like protein 1 OS=Homo sapiens GN=EHBP1L1 PE=1 SV=2
501	2896	sp|Q3L8U1|CHD9_HUMAN	35.66	0	3	0	Deamidation (NQ); Oxidation (M)	326022	Chromodomain-helicase-DNA-binding protein 9 OS=Homo sapiens GN=CHD9 PE=1 SV=2
676	1517	sp|Q13753|LAMC2_HUMAN	35.61	1	3	0	Deamidation (NQ); Phosphorylation (STY)	130976	Laminin subunit gamma-2 OS=Homo sapiens GN=LAMC2 PE=1 SV=2
771	1055	sp|Q14993|COJA1_HUMAN	35.6	1	3	0	Deamidation (NQ)	115221	Collagen alpha-1(XIX) chain OS=Homo sapiens GN=COL19A1 PE=1 SV=3
531	8341	sp|Q96AY4|TTC28_HUMAN	35.52	1	3	0	Deamidation (NQ)	270882	Tetratricopeptide repeat protein 28 OS=Homo sapiens GN=TTC28 PE=1 SV=4
440	5561	sp|Q7Z407|CSMD3_HUMAN	35.4	0	3	0	Deamidation (NQ); Phosphorylation (STY)	406001	CUB and sushi domain-containing protein 3 OS=Homo sapiens GN=CSMD3 PE=2 SV=3
702	3932	sp|O95996|APCL_HUMAN	34.96	1	3	0		243946	Adenomatous polyposis coli protein 2 OS=Homo sapiens GN=APC2 PE=1 SV=1
508	3201	sp|Q8TDW7|FAT3_HUMAN	34.81	0	3	0		505527	Protocadherin Fat 3 OS=Homo sapiens GN=FAT3 PE=2 SV=2
574	865	sp|Q9H6P5|TASP1_HUMAN	34.79	4	3	0	Oxidation (M)	44456	Threonine aspartase 1 OS=Homo sapiens GN=TASP1 PE=1 SV=1
684	10458	sp|P51610|HCFC1_HUMAN	34.71	1	3	0	Phosphorylation (STY)	208730	Host cell factor 1 OS=Homo sapiens GN=HCFC1 PE=1 SV=2
783	10455	sp|Q9Y5Y9|SCNAA_HUMAN	34.71	1	3	0		220624	Sodium channel protein type 10 subunit alpha OS=Homo sapiens GN=SCN10A PE=1 SV=2
719	7220	sp|Q6ZS81|WDFY4_HUMAN	34.58	0	3	0	Deamidation (NQ)	353610	WD repeat- and FYVE domain-containing protein 4 OS=Homo sapiens GN=WDFY4 PE=1 SV=3
600	5801	sp|Q6ZTR5|CFA47_HUMAN	34.4	0	3	0	Deamidation (NQ)	351949	Cilia- and flagella-associated protein 47 OS=Homo sapiens GN=CFAP47 PE=2 SV=4
699	4824	sp|Q6PGP7|TTC37_HUMAN	34.4	1	3	0	Oxidation (M)	175485	Tetratricopeptide repeat protein 37 OS=Homo sapiens GN=TTC37 PE=1 SV=1
518	7061	sp|O15078|CE290_HUMAN	34.39	1	3	0		290384	Centrosomal protein of 290 kDa OS=Homo sapiens GN=CEP290 PE=1 SV=2
697	2886	sp|Q02388|CO7A1_HUMAN	34.3	1	3	0	Deamidation (NQ)	295216	Collagen alpha-1(VII) chain OS=Homo sapiens GN=COL7A1 PE=1 SV=2
636	5470	sp|Q99996|AKAP9_HUMAN	34.28	0	3	0		453670	A-kinase anchor protein 9 OS=Homo sapiens GN=AKAP9 PE=1 SV=3
782	9243	sp|O94986|CE152_HUMAN	34.19	1	3	0		195625	Centrosomal protein of 152 kDa OS=Homo sapiens GN=CEP152 PE=1 SV=4
657	4511	sp|Q7Z7G8|VP13B_HUMAN	34.18	0	3	0	Phosphorylation (STY)	448667	Vacuolar protein sorting-associated protein 13B OS=Homo sapiens GN=VPS13B PE=1 SV=2
629	3442	sp|P02549|SPTA1_HUMAN	33.9	1	3	0		280013	Spectrin alpha chain erythrocytic 1 OS=Homo sapiens GN=SPTA1 PE=1 SV=5
758	1668	sp|Q8N2N9|AN36B_HUMAN	33.88	1	3	0	Deamidation (NQ)	153582	Ankyrin repeat domain-containing protein 36B OS=Homo sapiens GN=ANKRD36B PE=1 SV=4
752	1210	sp|P25205|MCM3_HUMAN	33.8	2	3	0	Deamidation (NQ)	90981	DNA replication licensing factor MCM3 OS=Homo sapiens GN=MCM3 PE=1 SV=3
614	1743	sp|P12882|MYH1_HUMAN	33.77	1	3	0	Deamidation (NQ); Phosphorylation (STY)	223143	Myosin-1 OS=Homo sapiens GN=MYH1 PE=1 SV=3
730	1074	sp|Q8IX18|DHX40_HUMAN	33.71	2	3	0	Deamidation (NQ)	88560	Probable ATP-dependent RNA helicase DHX40 OS=Homo sapiens GN=DHX40 PE=1 SV=2
739	6600	sp|Q07864|DPOE1_HUMAN	33.53	1	3	0	Phosphorylation (STY)	261515	DNA polymerase epsilon catalytic subunit A OS=Homo sapiens GN=POLE PE=1 SV=5
604	3227	sp|Q15149|PLEC_HUMAN	33.45	0	3	0		531796	Plectin OS=Homo sapiens GN=PLEC PE=1 SV=3
753	1649	sp|P02771|FETA_HUMAN	33.25	2	3	0	Phosphorylation (STY)	68678	Alpha-fetoprotein OS=Homo sapiens GN=AFP PE=1 SV=1
773	1439	sp|O43432|IF4G3_HUMAN	33.12	1	3	0		176651	Eukaryotic translation initiation factor 4 gamma 3 OS=Homo sapiens GN=EIF4G3 PE=1 SV=2
754	1413	sp|Q8IWC1|MA7D3_HUMAN	33.09	2	3	0		98429	MAP7 domain-containing protein 3 OS=Homo sapiens GN=MAP7D3 PE=1 SV=2
628	2619	sp|Q4AC94|C2CD3_HUMAN	32.94	1	3	0	Phosphorylation (STY)	260386	C2 domain-containing protein 3 OS=Homo sapiens GN=C2CD3 PE=1 SV=4
588	4639	sp|Q5VST9|OBSCN_HUMAN	32.89	0	3	0	Deamidation (NQ); Oxidation (M)	868496	Obscurin OS=Homo sapiens GN=OBSCN PE=1 SV=3
616	3590	sp|O75376|NCOR1_HUMAN	32.55	1	3	0		270207	Nuclear receptor corepressor 1 OS=Homo sapiens GN=NCOR1 PE=1 SV=2
652	3042	sp|P13533|MYH6_HUMAN	32.53	1	3	0	Deamidation (NQ); Phosphorylation (STY)	223733	Myosin-6 OS=Homo sapiens GN=MYH6 PE=1 SV=5
717	2712	sp|Q9NRP7|STK36_HUMAN	32.48	1	3	0	Deamidation (NQ)	143995	Serine/threonine-protein kinase 36 OS=Homo sapiens GN=STK36 PE=1 SV=2
513	7277	sp|Q86UK0|ABCAC_HUMAN	32.44	1	3	0	Phosphorylation (STY)	293235	ATP-binding cassette sub-family A member 12 OS=Homo sapiens GN=ABCA12 PE=1 SV=3
701	3624	sp|P30622|CLIP1_HUMAN	32.16	1	3	0	Phosphorylation (STY)	162246	CAP-Gly domain-containing linker protein 1 OS=Homo sapiens GN=CLIP1 PE=1 SV=2
645	2240	sp|Q9NZJ4|SACS_HUMAN	31.93	0	3	0		521131	Sacsin OS=Homo sapiens GN=SACS PE=1 SV=2
646	3093	sp|P20929|NEBU_HUMAN	31.85	0	3	0		772931	Nebulin OS=Homo sapiens GN=NEB PE=1 SV=5
618	7134	sp|P25054|APC_HUMAN	31.8	1	3	0	Deamidation (NQ)	311646	Adenomatous polyposis coli protein OS=Homo sapiens GN=APC PE=1 SV=2
606	6735	sp|Q5T5P2|SKT_HUMAN	31.79	1	3	0	Phosphorylation (STY)	214114	Sickle tail protein homolog OS=Homo sapiens GN=KIAA1217 PE=1 SV=2
667	6676	sp|Q13698|CAC1S_HUMAN	31.77	1	3	0	Deamidation (NQ)	212349	Voltage-dependent L-type calcium channel subunit alpha-1S OS=Homo sapiens GN=CACNA1S PE=1 SV=4
612	2933	sp|Q8NFP9|NBEA_HUMAN	31.17	1	3	0		327821	Neurobeachin OS=Homo sapiens GN=NBEA PE=1 SV=3
635	2592	sp|Q7RTP6|MICA3_HUMAN	31.02	1	3	0	Carbamidomethylation; Phosphorylation (STY)	224293	[F-actin]-methionine sulfoxide oxidase MICAL3 OS=Homo sapiens GN=MICAL3 PE=1 SV=2
778	4362	sp|Q8NDW8|TT21A_HUMAN	30.72	1	3	0	Deamidation (NQ)	150944	Tetratricopeptide repeat protein 21A OS=Homo sapiens GN=TTC21A PE=2 SV=3
698	3630	sp|Q92817|EVPL_HUMAN	30.68	1	3	0	Phosphorylation (STY)	231602	Envoplakin OS=Homo sapiens GN=EVPL PE=1 SV=3
681	4898	sp|Q96PZ7|CSMD1_HUMAN	30.36	0	3	0	Deamidation (NQ)	388871	CUB and sushi domain-containing protein 1 OS=Homo sapiens GN=CSMD1 PE=1 SV=2
466	553	sp|Q8IUE6|H2A2B_HUMAN	75.86	22	2	2		13995	Histone H2A type 2-B OS=Homo sapiens GN=HIST2H2AB PE=1 SV=3
466	554	sp|P16104|H2AX_HUMAN	75.86	20	2	2		15145	Histone H2AX OS=Homo sapiens GN=H2AFX PE=1 SV=2
466	577	sp|Q99878|H2A1J_HUMAN	75.86	22	2	2		13936	Histone H2A type 1-J OS=Homo sapiens GN=HIST1H2AJ PE=1 SV=3
466	578	sp|Q96KK5|H2A1H_HUMAN	75.86	22	2	2		13906	Histone H2A type 1-H OS=Homo sapiens GN=HIST1H2AH PE=1 SV=3
466	579	sp|Q16777|H2A2C_HUMAN	75.86	22	2	2		13988	Histone H2A type 2-C OS=Homo sapiens GN=HIST2H2AC PE=1 SV=4
466	580	sp|Q9BTM1|H2AJ_HUMAN	75.86	22	2	2		14019	Histone H2A.J OS=Homo sapiens GN=H2AFJ PE=1 SV=1
466	581	sp|P20671|H2A1D_HUMAN	75.86	22	2	2		14107	Histone H2A type 1-D OS=Homo sapiens GN=HIST1H2AD PE=1 SV=2
466	582	sp|P0C0S8|H2A1_HUMAN	75.86	22	2	2		14091	Histone H2A type 1 OS=Homo sapiens GN=HIST1H2AG PE=1 SV=2
466	583	sp|Q93077|H2A1C_HUMAN	75.86	22	2	2		14105	Histone H2A type 1-C OS=Homo sapiens GN=HIST1H2AC PE=1 SV=3
466	584	sp|Q7L7L0|H2A3_HUMAN	75.86	22	2	2		14121	Histone H2A type 3 OS=Homo sapiens GN=HIST3H2A PE=1 SV=3
466	585	sp|Q6FI13|H2A2A_HUMAN	75.86	22	2	2		14095	Histone H2A type 2-A OS=Homo sapiens GN=HIST2H2AA3 PE=1 SV=3
466	586	sp|P04908|H2A1B_HUMAN	75.86	22	2	2		14135	Histone H2A type 1-B/E OS=Homo sapiens GN=HIST1H2AB PE=1 SV=2
466	550	sp|Q96QV6|H2A1A_HUMAN	75.86	21	2	2		14233	Histone H2A type 1-A OS=Homo sapiens GN=HIST1H2AA PE=1 SV=3
322	536	sp|Q92633|LPAR1_HUMAN	74.58	5	2	2		41109	Lysophosphatidic acid receptor 1 OS=Homo sapiens GN=LPAR1 PE=1 SV=3
483	588	sp|P11233|RALA_HUMAN	73.03	14	2	2		23567	Ras-related protein Ral-A OS=Homo sapiens GN=RALA PE=1 SV=1
429	515	sp|P11117|PPAL_HUMAN	72.31	5	2	2		48344	Lysosomal acid phosphatase OS=Homo sapiens GN=ACP2 PE=1 SV=3
707	549	sp|P10619|PPGB_HUMAN	69.41	5	2	2	Carbamidomethylation	54466	Lysosomal protective protein OS=Homo sapiens GN=CTSA PE=1 SV=2
708	556	sp|O95297|MPZL1_HUMAN	66.81	10	2	2	Carbamidomethylation	29082	Myelin protein zero-like protein 1 OS=Homo sapiens GN=MPZL1 PE=1 SV=1
1338	759	sp|P11234|RALB_HUMAN	66.79	8	2	2		23409	Ras-related protein Ral-B OS=Homo sapiens GN=RALB PE=1 SV=1
380	595	sp|Q15012|LAP4A_HUMAN	66.07	11	2	2		26801	Lysosomal-associated transmembrane protein 4A OS=Homo sapiens GN=LAPTM4A PE=1 SV=1
520	520	sp|Q969P0|IGSF8_HUMAN	65.2	4	2	2		65034	Immunoglobulin superfamily member 8 OS=Homo sapiens GN=IGSF8 PE=1 SV=1
419	603	sp|Q5VXT5|SYPL2_HUMAN	64.44	8	2	2		30156	Synaptophysin-like protein 2 OS=Homo sapiens GN=SYPL2 PE=2 SV=1
437	589	sp|O75508|CLD11_HUMAN	58.18	14	2	2	Carbamidomethylation; Phosphorylation (STY)	21993	Claudin-11 OS=Homo sapiens GN=CLDN11 PE=1 SV=2
641	531	sp|P01008|ANT3_HUMAN	57.55	5	2	2		52602	Antithrombin-III OS=Homo sapiens GN=SERPINC1 PE=1 SV=1
555	599	sp|P62330|ARF6_HUMAN	57.13	13	2	2		20082	ADP-ribosylation factor 6 OS=Homo sapiens GN=ARF6 PE=1 SV=2
421	648	sp|Q16563|SYPL1_HUMAN	56.37	10	2	2	Carbamidomethylation	28565	Synaptophysin-like protein 1 OS=Homo sapiens GN=SYPL1 PE=1 SV=1
741	610	sp|Q13418|ILK_HUMAN	54.51	4	2	2		51419	Integrin-linked protein kinase OS=Homo sapiens GN=ILK PE=1 SV=2
991	524	sp|O60664|PLIN3_HUMAN	54.19	7	2	2		47075	Perilipin-3 OS=Homo sapiens GN=PLIN3 PE=1 SV=3
443	573	sp|P13612|ITA4_HUMAN	53.31	2	2	2		114899	Integrin alpha-4 OS=Homo sapiens GN=ITGA4 PE=1 SV=3
723	543	sp|P61421|VA0D1_HUMAN	52.83	7	2	2		40329	V-type proton ATPase subunit d 1 OS=Homo sapiens GN=ATP6V0D1 PE=1 SV=1
541	530	sp|P53985|MOT1_HUMAN	52.45	7	2	2		53944	Monocarboxylate transporter 1 OS=Homo sapiens GN=SLC16A1 PE=1 SV=3
671	552	sp|P55290|CAD13_HUMAN	52.27	4	2	2		78287	Cadherin-13 OS=Homo sapiens GN=CDH13 PE=1 SV=1
690	619	sp|P02545|LMNA_HUMAN	52.13	4	2	2		74140	Prelamin-A/C OS=Homo sapiens GN=LMNA PE=1 SV=1
381	620	sp|P54852|EMP3_HUMAN	51.01	13	2	2	Carbamidomethylation; Deamidation (NQ)	18429	Epithelial membrane protein 3 OS=Homo sapiens GN=EMP3 PE=1 SV=1
745	605	sp|P25189|MYP0_HUMAN	50.81	8	2	2		27555	Myelin protein P0 OS=Homo sapiens GN=MPZ PE=1 SV=1
1087	574	sp|P06865|HEXA_HUMAN	50.38	4	2	2		60703	Beta-hexosaminidase subunit alpha OS=Homo sapiens GN=HEXA PE=1 SV=2
672	655	sp|P35442|TSP2_HUMAN	49.94	2	2	2		129991	Thrombospondin-2 OS=Homo sapiens GN=THBS2 PE=1 SV=2
992	622	sp|Q9H3U5|MFSD1_HUMAN	49.64	6	2	2	Carbamidomethylation	51209	Major facilitator superfamily domain-containing protein 1 OS=Homo sapiens GN=MFSD1 PE=2 SV=2
724	596	sp|Q6IAA8|LTOR1_HUMAN	49.32	16	2	2		17745	Ragulator complex protein LAMTOR1 OS=Homo sapiens GN=LAMTOR1 PE=1 SV=2
1336	649	sp|Q9UK41|VPS28_HUMAN	48.7	11	2	2	Carbamidomethylation	25425	Vacuolar protein sorting-associated protein 28 homolog OS=Homo sapiens GN=VPS28 PE=1 SV=1
1036	653	sp|P46777|RL5_HUMAN	48.59	8	2	2	Carbamidomethylation; Deamidation (NQ)	34363	60S ribosomal protein L5 OS=Homo sapiens GN=RPL5 PE=1 SV=3
742	604	sp|P62241|RS8_HUMAN	48.29	12	2	2	Carbamidomethylation	24205	40S ribosomal protein S8 OS=Homo sapiens GN=RPS8 PE=1 SV=2
568	692	sp|Q13488|VPP3_HUMAN	48.05	2	2	2		92968	V-type proton ATPase 116 kDa subunit a isoform 3 OS=Homo sapiens GN=TCIRG1 PE=1 SV=3
543	635	sp|P62937|PPIA_HUMAN	46.4	12	2	2	Carbamidomethylation	18012	Peptidyl-prolyl cis-trans isomerase A OS=Homo sapiens GN=PPIA PE=1 SV=2
1275	616	sp|Q9GZP0|PDGFD_HUMAN	45.82	6	2	2		42848	Platelet-derived growth factor D OS=Homo sapiens GN=PDGFD PE=1 SV=1
1088	629	sp|P11766|ADHX_HUMAN	45.05	7	2	2		39724	Alcohol dehydrogenase class-3 OS=Homo sapiens GN=ADH5 PE=1 SV=4
743	575	sp|P52907|CAZA1_HUMAN	44.95	9	2	2		32923	F-actin-capping protein subunit alpha-1 OS=Homo sapiens GN=CAPZA1 PE=1 SV=3
444	651	sp|Q14956|GPNMB_HUMAN	44.91	6	2	2		63923	Transmembrane glycoprotein NMB OS=Homo sapiens GN=GPNMB PE=1 SV=2
744	621	sp|Q9Y617|SERC_HUMAN	44.17	5	2	2		40423	Phosphoserine aminotransferase OS=Homo sapiens GN=PSAT1 PE=1 SV=2
1337	664	sp|P47756|CAPZB_HUMAN	43.77	8	2	2		31350	F-actin-capping protein subunit beta OS=Homo sapiens GN=CAPZB PE=1 SV=4
567	630	sp|Q9Y6M5|ZNT1_HUMAN	43.1	6	2	2	Carbamidomethylation	55300	Zinc transporter 1 OS=Homo sapiens GN=SLC30A1 PE=1 SV=3
1035	598	sp|O60784|TOM1_HUMAN	43.08	6	2	2		53818	Target of Myb protein 1 OS=Homo sapiens GN=TOM1 PE=1 SV=2
566	539	sp|Q8TF66|LRC15_HUMAN	42.31	5	2	2		64366	Leucine-rich repeat-containing protein 15 OS=Homo sapiens GN=LRRC15 PE=2 SV=2
1279	708	sp|Q9UL26|RB22A_HUMAN	42.2	9	2	2	Carbamidomethylation; Deamidation (NQ)	21855	Ras-related protein Rab-22A OS=Homo sapiens GN=RAB22A PE=1 SV=2
1281	671	sp|O75487|GPC4_HUMAN	40.8	5	2	2		62412	Glypican-4 OS=Homo sapiens GN=GPC4 PE=1 SV=4
689	513	sp|P29401|TKT_HUMAN	40.41	8	2	2		67878	Transketolase OS=Homo sapiens GN=TKT PE=1 SV=3
447	641	sp|P09211|GSTP1_HUMAN	39.84	13	2	2		23356	Glutathione S-transferase P OS=Homo sapiens GN=GSTP1 PE=1 SV=2
674	659	sp|P37802|TAGL2_HUMAN	39.33	18	2	2	Carbamidomethylation	22391	Transgelin-2 OS=Homo sapiens GN=TAGLN2 PE=1 SV=3
763	643	sp|P48449|ERG7_HUMAN	39.05	4	2	2		83309	Lanosterol synthase OS=Homo sapiens GN=LSS PE=1 SV=1
875	541	sp|P24043|LAMA2_HUMAN	39.03	1	2	2		343906	Laminin subunit alpha-2 OS=Homo sapiens GN=LAMA2 PE=1 SV=4
1220	591	sp|Q13162|PRDX4_HUMAN	38.46	8	2	2		30540	Peroxiredoxin-4 OS=Homo sapiens GN=PRDX4 PE=1 SV=1
791	699	sp|P62701|RS4X_HUMAN	37.4	6	2	2		29598	40S ribosomal protein S4 X isoform OS=Homo sapiens GN=RPS4X PE=1 SV=2
658	673	sp|P52209|6PGD_HUMAN	36.49	6	2	2		53140	6-phosphogluconate dehydrogenase decarboxylating OS=Homo sapiens GN=PGD PE=1 SV=3
711	676	sp|Q14156|EFR3A_HUMAN	36.46	3	2	2		92924	Protein EFR3 homolog A OS=Homo sapiens GN=EFR3A PE=1 SV=2
1285	776	sp|Q9NVA2|SEP11_HUMAN	36.17	5	2	2		49398	Septin-11 OS=Homo sapiens GN=SEPT11 PE=1 SV=3
1278	738	sp|P63244|RACK1_HUMAN	35.96	8	2	2	Carbamidomethylation	35077	Receptor of activated protein C kinase 1 OS=Homo sapiens GN=RACK1 PE=1 SV=3
725	682	sp|O43184|ADA12_HUMAN	35.06	3	2	2		99542	Disintegrin and metalloproteinase domain-containing protein 12 OS=Homo sapiens GN=ADAM12 PE=1 SV=3
766	668	sp|P62851|RS25_HUMAN	34.21	15	2	2		13742	40S ribosomal protein S25 OS=Homo sapiens GN=RPS25 PE=1 SV=1
570	793	sp|P17844|DDX5_HUMAN	33.31	3	2	2		69148	Probable ATP-dependent RNA helicase DDX5 OS=Homo sapiens GN=DDX5 PE=1 SV=1
1345	909	sp|P60981|DEST_HUMAN	31.23	12	2	2		18506	Destrin OS=Homo sapiens GN=DSTN PE=1 SV=3
1290	818	sp|Q86VE9|SERC5_HUMAN	30.68	4	2	2		47009	Serine incorporator 5 OS=Homo sapiens GN=SERINC5 PE=2 SV=1
573	934	sp|P31949|S10AB_HUMAN	30.41	26	2	2	Carbamidomethylation	11740	Protein S100-A11 OS=Homo sapiens GN=S100A11 PE=1 SV=2
1227	798	sp|Q9ULC3|RAB23_HUMAN	30.24	8	2	2	Deamidation (NQ)	26659	Ras-related protein Rab-23 OS=Homo sapiens GN=RAB23 PE=1 SV=1
1348	772	sp|P62826|RAN_HUMAN	29.89	11	2	2	Carbamidomethylation	24423	GTP-binding nuclear protein Ran OS=Homo sapiens GN=RAN PE=1 SV=3
1349	937	sp|P25789|PSA4_HUMAN	29.87	9	2	2	Carbamidomethylation	29484	Proteasome subunit alpha type-4 OS=Homo sapiens GN=PSMA4 PE=1 SV=1
1040	689	sp|Q13740|CD166_HUMAN	29.4	4	2	2		65102	CD166 antigen OS=Homo sapiens GN=ALCAM PE=1 SV=2
799	801	sp|P78417|GSTO1_HUMAN	28.39	7	2	2		27566	Glutathione S-transferase omega-1 OS=Homo sapiens GN=GSTO1 PE=1 SV=2
1229	894	sp|Q07065|CKAP4_HUMAN	26.01	4	2	2		66023	Cytoskeleton-associated protein 4 OS=Homo sapiens GN=CKAP4 PE=1 SV=2
1308	992	sp|P49189|AL9A1_HUMAN	24.59	5	2	2	Carbamidomethylation	53802	4-trimethylaminobutyraldehyde dehydrogenase OS=Homo sapiens GN=ALDH9A1 PE=1 SV=3
315	642	sp|Q01628|IFM3_HUMAN	95.83	31	2	1	Oxidation (M)	14632	Interferon-induced transmembrane protein 3 OS=Homo sapiens GN=IFITM3 PE=1 SV=2
344	678	sp|Q01629|IFM2_HUMAN	70.04	31	2	1	Deamidation (NQ); Oxidation (M)	14632	Interferon-induced transmembrane protein 2 OS=Homo sapiens GN=IFITM2 PE=1 SV=2
787	606	sp|P32119|PRDX2_HUMAN	64	10	2	1		21892	Peroxiredoxin-2 OS=Homo sapiens GN=PRDX2 PE=1 SV=5
691	749	sp|P63027|VAMP2_HUMAN	63.09	19	2	1	Phosphorylation (STY)	12663	Vesicle-associated membrane protein 2 OS=Homo sapiens GN=VAMP2 PE=1 SV=3
367	644	sp|P02647|APOA1_HUMAN	62.93	8	2	1	Deamidation (NQ)	30778	Apolipoprotein A-I OS=Homo sapiens GN=APOA1 PE=1 SV=1
673	684	sp|Q9Y4F1|FARP1_HUMAN	61.65	2	2	1		118633	FERM RhoGEF and pleckstrin domain-containing protein 1 OS=Homo sapiens GN=FARP1 PE=1 SV=1
1276	639	sp|O15511|ARPC5_HUMAN	58.04	11	2	1		16320	Actin-related protein 2/3 complex subunit 5 OS=Homo sapiens GN=ARPC5 PE=1 SV=3
128	670	sp|P69891|HBG1_HUMAN	54.44	13	2	1		16140	Hemoglobin subunit gamma-1 OS=Homo sapiens GN=HBG1 PE=1 SV=2
128	669	sp|P69892|HBG2_HUMAN	54.44	13	2	1		16126	Hemoglobin subunit gamma-2 OS=Homo sapiens GN=HBG2 PE=1 SV=2
128	717	sp|P02100|HBE_HUMAN	54.44	13	2	1		16203	Hemoglobin subunit epsilon OS=Homo sapiens GN=HBE1 PE=1 SV=2
479	594	sp|Q9UN37|VPS4A_HUMAN	51.66	6	2	1		48898	Vacuolar protein sorting-associated protein 4A OS=Homo sapiens GN=VPS4A PE=1 SV=1
1219	555	sp|Q5QNW6|H2B2F_HUMAN	51.27	20	2	1		13920	Histone H2B type 2-F OS=Homo sapiens GN=HIST2H2BF PE=1 SV=3
1219	564	sp|P62807|H2B1C_HUMAN	51.27	20	2	1		13906	Histone H2B type 1-C/E/F/G/I OS=Homo sapiens GN=HIST1H2BC PE=1 SV=4
1219	565	sp|Q99879|H2B1M_HUMAN	51.27	20	2	1		13989	Histone H2B type 1-M OS=Homo sapiens GN=HIST1H2BM PE=1 SV=3
1219	566	sp|P58876|H2B1D_HUMAN	51.27	20	2	1		13936	Histone H2B type 1-D OS=Homo sapiens GN=HIST1H2BD PE=1 SV=2
1219	567	sp|Q99877|H2B1N_HUMAN	51.27	20	2	1		13922	Histone H2B type 1-N OS=Homo sapiens GN=HIST1H2BN PE=1 SV=3
1219	563	sp|Q99880|H2B1L_HUMAN	51.27	20	2	1		13952	Histone H2B type 1-L OS=Homo sapiens GN=HIST1H2BL PE=1 SV=3
1219	568	sp|Q93079|H2B1H_HUMAN	51.27	20	2	1		13892	Histone H2B type 1-H OS=Homo sapiens GN=HIST1H2BH PE=1 SV=3
1219	569	sp|O60814|H2B1K_HUMAN	51.27	20	2	1		13890	Histone H2B type 1-K OS=Homo sapiens GN=HIST1H2BK PE=1 SV=3
1219	570	sp|P57053|H2BFS_HUMAN	51.27	20	2	1		13944	Histone H2B type F-S OS=Homo sapiens GN=H2BFS PE=1 SV=2
915	663	sp|Q15436|SC23A_HUMAN	50.09	2	2	1	Deamidation (NQ)	86161	Protein transport protein Sec23A OS=Homo sapiens GN=SEC23A PE=1 SV=2
589	609	sp|Q01813|PFKAP_HUMAN	49.2	2	2	1		85596	ATP-dependent 6-phosphofructokinase platelet type OS=Homo sapiens GN=PFKP PE=1 SV=2
1091	679	sp|Q15833|STXB2_HUMAN	48.39	4	2	1		66453	Syntaxin-binding protein 2 OS=Homo sapiens GN=STXBP2 PE=1 SV=2
789	724	sp|P00387|NB5R3_HUMAN	42.98	5	2	1		34235	NADH-cytochrome b5 reductase 3 OS=Homo sapiens GN=CYB5R3 PE=1 SV=3
411	593	sp|Q08722|CD47_HUMAN	42.89	5	2	1		35214	Leukocyte surface antigen CD47 OS=Homo sapiens GN=CD47 PE=1 SV=1
993	590	sp|P35998|PRS7_HUMAN	41.24	4	2	1		48634	26S proteasome regulatory subunit 7 OS=Homo sapiens GN=PSMC2 PE=1 SV=3
1038	734	sp|P53621|COPA_HUMAN	40.06	1	2	1	Phosphorylation (STY)	138345	Coatomer subunit alpha OS=Homo sapiens GN=COPA PE=1 SV=2
458	685	sp|P18433|PTPRA_HUMAN	39.76	2	2	1		90600	Receptor-type tyrosine-protein phosphatase alpha OS=Homo sapiens GN=PTPRA PE=1 SV=2
1280	674	sp|Q8ND94|LRN4L_HUMAN	39.32	11	2	1	Carbamidomethylation	25262	LRRN4 C-terminal-like protein OS=Homo sapiens GN=LRRN4CL PE=2 SV=1
1288	861	sp|Q92629|SGCD_HUMAN	39.01	3	2	1		32071	Delta-sarcoglycan OS=Homo sapiens GN=SGCD PE=1 SV=2
1277	624	sp|P23527|H2B1O_HUMAN	38.22	20	2	1		13906	Histone H2B type 1-O OS=Homo sapiens GN=HIST1H2BO PE=1 SV=3
1277	623	sp|Q8N257|H2B3B_HUMAN	38.22	20	2	1		13908	Histone H2B type 3-B OS=Homo sapiens GN=HIST3H2BB PE=1 SV=3
1277	625	sp|P33778|H2B1B_HUMAN	38.22	20	2	1		13950	Histone H2B type 1-B OS=Homo sapiens GN=HIST1H2BB PE=1 SV=2
1277	626	sp|P06899|H2B1J_HUMAN	38.22	20	2	1		13904	Histone H2B type 1-J OS=Homo sapiens GN=HIST1H2BJ PE=1 SV=3
1277	627	sp|Q16778|H2B2E_HUMAN	38.22	20	2	1		13920	Histone H2B type 2-E OS=Homo sapiens GN=HIST2H2BE PE=1 SV=3
1093	695	sp|Q13200|PSMD2_HUMAN	38.04	2	2	1		100200	26S proteasome non-ATPase regulatory subunit 2 OS=Homo sapiens GN=PSMD2 PE=1 SV=3
1221	686	sp|Q99961|SH3G1_HUMAN	37.59	7	2	1	Carbamidomethylation	41490	Endophilin-A2 OS=Homo sapiens GN=SH3GL1 PE=1 SV=1
692	600	sp|P07947|YES_HUMAN	36.24	3	2	1		60801	Tyrosine-protein kinase Yes OS=Homo sapiens GN=YES1 PE=1 SV=3
692	672	sp|P06241|FYN_HUMAN	36.24	3	2	1		60762	Tyrosine-protein kinase Fyn OS=Homo sapiens GN=FYN PE=1 SV=3
1153	779	sp|O94886|CSCL1_HUMAN	34.8	2	2	1		92126	CSC1-like protein 1 OS=Homo sapiens GN=TMEM63A PE=1 SV=3
749	846	sp|Q9HB90|RRAGC_HUMAN	32.56	4	2	1	Phosphorylation (STY)	44224	Ras-related GTP-binding protein C OS=Homo sapiens GN=RRAGC PE=1 SV=1
886	1248	sp|Q8IZT6|ASPM_HUMAN	31.74	0	2	1	Carbamidomethylation	409801	Abnormal spindle-like microcephaly-associated protein OS=Homo sapiens GN=ASPM PE=1 SV=2
1291	912	sp|P98198|AT8B2_HUMAN	31.65	1	2	1		137440	Phospholipid-transporting ATPase ID OS=Homo sapiens GN=ATP8B2 PE=1 SV=2
1095	876	sp|P33908|MA1A1_HUMAN	30.82	3	2	1		72969	Mannosyl-oligosaccharide 1 2-alpha-mannosidase IA OS=Homo sapiens GN=MAN1A1 PE=1 SV=3
1296	969	sp|P61163|ACTZ_HUMAN	30.58	4	2	1		42614	Alpha-centractin OS=Homo sapiens GN=ACTR1A PE=1 SV=1
1296	970	sp|P42025|ACTY_HUMAN	30.58	4	2	1		42293	Beta-centractin OS=Homo sapiens GN=ACTR1B PE=1 SV=1
1293	1251	sp|Q9H2V7|SPNS1_HUMAN	30.07	4	2	1	Phosphorylation (STY)	56630	Protein spinster homolog 1 OS=Homo sapiens GN=SPNS1 PE=1 SV=1
916	1008	sp|Q709C8|VP13C_HUMAN	28.28	0	2	1		422393	Vacuolar protein sorting-associated protein 13C OS=Homo sapiens GN=VPS13C PE=1 SV=1
1352	1563	sp|Q68DY1|ZN626_HUMAN	28	3	2	1	Deamidation (NQ); Phosphorylation (STY)	60893	Zinc finger protein 626 OS=Homo sapiens GN=ZNF626 PE=2 SV=2
1230	981	sp|P42892|ECE1_HUMAN	27.73	3	2	1	Carbamidomethylation	87164	Endothelin-converting enzyme 1 OS=Homo sapiens GN=ECE1 PE=1 SV=2
851	2007	sp|O15018|PDZD2_HUMAN	26.47	0	2	1	Deamidation (NQ)	301640	PDZ domain-containing protein 2 OS=Homo sapiens GN=PDZD2 PE=1 SV=4
643	1000	sp|P35555|FBN1_HUMAN	26.27	0	2	1	Phosphorylation (STY)	312237	Fibrillin-1 OS=Homo sapiens GN=FBN1 PE=1 SV=3
1313	1851	sp|P50416|CPT1A_HUMAN	26.23	3	2	1	Phosphorylation (STY)	88368	Carnitine O-palmitoyltransferase 1 liver isoform OS=Homo sapiens GN=CPT1A PE=1 SV=2
1159	1131	sp|O14494|PLPP1_HUMAN	25.73	9	2	1	Deamidation (NQ)	32156	Phospholipid phosphatase 1 OS=Homo sapiens GN=PLPP1 PE=1 SV=1
1052	1662	sp|P55287|CAD11_HUMAN	24.94	2	2	1	Phosphorylation (STY)	87965	Cadherin-11 OS=Homo sapiens GN=CDH11 PE=2 SV=2
328	542	sp|P14136|GFAP_HUMAN	62.6	5	2	0		49880	Glial fibrillary acidic protein OS=Homo sapiens GN=GFAP PE=1 SV=1
276	654	sp|Q7Z6P3|RAB44_HUMAN	61.85	2	2	0		77638	Ras-related protein Rab-44 OS=Homo sapiens GN=RAB44 PE=1 SV=3
266	645	sp|P20338|RAB4A_HUMAN	61.44	7	2	0		24390	Ras-related protein Rab-4A OS=Homo sapiens GN=RAB4A PE=1 SV=3
266	636	sp|P61018|RAB4B_HUMAN	61.44	8	2	0		23587	Ras-related protein Rab-4B OS=Homo sapiens GN=RAB4B PE=1 SV=1
282	632	sp|Q96E17|RAB3C_HUMAN	61.24	7	2	0		25952	Ras-related protein Rab-3C OS=Homo sapiens GN=RAB3C PE=2 SV=1
602	712	sp|Q9H254|SPTN4_HUMAN	55.11	1	2	0	Deamidation (NQ); Phosphorylation (STY)	288984	Spectrin beta chain non-erythrocytic 4 OS=Homo sapiens GN=SPTBN4 PE=1 SV=2
368	658	sp|P10721|KIT_HUMAN	50.71	1	2	0	Carbamidomethylation	109864	Mast/stem cell growth factor receptor Kit OS=Homo sapiens GN=KIT PE=1 SV=1
373	675	sp|P35968|VGFR2_HUMAN	49.53	1	2	0	Carbamidomethylation	151526	Vascular endothelial growth factor receptor 2 OS=Homo sapiens GN=KDR PE=1 SV=2
364	762	sp|P17948|VGFR1_HUMAN	48	1	2	0	Carbamidomethylation	150768	Vascular endothelial growth factor receptor 1 OS=Homo sapiens GN=FLT1 PE=1 SV=2
565	608	sp|Q9Y3L5|RAP2C_HUMAN	45.82	10	2	0		20745	Ras-related protein Rap-2c OS=Homo sapiens GN=RAP2C PE=1 SV=1
338	697	sp|Q9UJ72|ANX10_HUMAN	42.43	4	2	0	Carbamidomethylation	37278	Annexin A10 OS=Homo sapiens GN=ANXA10 PE=1 SV=3
809	799	sp|P06276|CHLE_HUMAN	38.63	2	2	0		68418	Cholinesterase OS=Homo sapiens GN=BCHE PE=1 SV=1
767	730	sp|Q9BYZ2|LDH6B_HUMAN	38.55	4	2	0		41943	L-lactate dehydrogenase A-like 6B OS=Homo sapiens GN=LDHAL6B PE=1 SV=3
1089	628	sp|Q92526|TCPW_HUMAN	38.06	3	2	0		57821	T-complex protein 1 subunit zeta-2 OS=Homo sapiens GN=CCT6B PE=1 SV=5
1282	720	sp|Q99962|SH3G2_HUMAN	36.86	5	2	0		39962	Endophilin-A1 OS=Homo sapiens GN=SH3GL2 PE=1 SV=1
747	806	sp|Q14004|CDK13_HUMAN	36.62	1	2	0	Phosphorylation (STY)	164922	Cyclin-dependent kinase 13 OS=Homo sapiens GN=CDK13 PE=1 SV=2
794	770	sp|Q00536|CDK16_HUMAN	35.99	3	2	0		55716	Cyclin-dependent kinase 16 OS=Homo sapiens GN=CDK16 PE=1 SV=1
769	1022	sp|P08519|APOA_HUMAN	35.88	0	2	0		501323	Apolipoprotein(a) OS=Homo sapiens GN=LPA PE=1 SV=1
1152	783	sp|O43933|PEX1_HUMAN	35.53	1	2	0		142867	Peroxisome biogenesis factor 1 OS=Homo sapiens GN=PEX1 PE=1 SV=1
1105	1780	sp|Q9UPW5|CBPC1_HUMAN	35.05	1	2	0		138448	Cytosolic carboxypeptidase 1 OS=Homo sapiens GN=AGTPBP1 PE=1 SV=3
1237	1466	sp|Q6ZUX3|TGRM2_HUMAN	35.05	1	2	0		111153	TOG array regulator of axonemal microtubules protein 2 OS=Homo sapiens GN=TOGARAM2 PE=2 SV=2
682	5086	sp|P21359|NF1_HUMAN	34.65	0	2	0		319372	Neurofibromin OS=Homo sapiens GN=NF1 PE=1 SV=2
797	785	sp|O75628|REM1_HUMAN	34.64	5	2	0		32947	GTP-binding protein REM 1 OS=Homo sapiens GN=REM1 PE=1 SV=2
407	797	sp|Q06278|AOXA_HUMAN	33.81	1	2	0		147918	Aldehyde oxidase OS=Homo sapiens GN=AOX1 PE=1 SV=2
1015	5411	sp|A7E2V4|ZSWM8_HUMAN	33.76	1	2	0		197296	Zinc finger SWIM domain-containing protein 8 OS=Homo sapiens GN=ZSWIM8 PE=1 SV=1
544	773	sp|Q9Y5G4|PCDG9_HUMAN	33.63	2	2	0	Deamidation (NQ)	101687	Protocadherin gamma-A9 OS=Homo sapiens GN=PCDHGA9 PE=2 SV=1
731	1577	sp|O94875|SRBS2_HUMAN	33.34	1	2	0	Deamidation (NQ)	124107	Sorbin and SH3 domain-containing protein 2 OS=Homo sapiens GN=SORBS2 PE=1 SV=3
777	5078	sp|Q5THR3|EFCB6_HUMAN	33.11	1	2	0	Phosphorylation (STY)	172929	EF-hand calcium-binding domain-containing protein 6 OS=Homo sapiens GN=EFCAB6 PE=1 SV=1
770	1089	sp|Q6ZRF8|RN207_HUMAN	32.95	2	2	0	Deamidation (NQ)	70861	RING finger protein 207 OS=Homo sapiens GN=RNF207 PE=1 SV=2
1228	962	sp|Q13761|RUNX3_HUMAN	32.74	2	2	0	Deamidation (NQ)	44356	Runt-related transcription factor 3 OS=Homo sapiens GN=RUNX3 PE=1 SV=2
1081	10548	sp|Q4ZHG4|FNDC1_HUMAN	32.43	1	2	0	Phosphorylation (STY)	205557	Fibronectin type III domain-containing protein 1 OS=Homo sapiens GN=FNDC1 PE=2 SV=4
1106	1716	sp|O15034|RIMB2_HUMAN	32.29	1	2	0		116026	RIMS-binding protein 2 OS=Homo sapiens GN=RIMBP2 PE=1 SV=3
998	1628	sp|Q0VD83|APOBR_HUMAN	32.23	1	2	0		114874	Apolipoprotein B receptor OS=Homo sapiens GN=APOBR PE=1 SV=2
1242	1731	sp|Q12882|DPYD_HUMAN	32.2	1	2	0	Deamidation (NQ)	111401	Dihydropyrimidine dehydrogenase [NADP(+)] OS=Homo sapiens GN=DPYD PE=1 SV=2
1163	1347	sp|Q6DN90|IQEC1_HUMAN	32.1	1	2	0		108314	IQ motif and SEC7 domain-containing protein 1 OS=Homo sapiens GN=IQSEC1 PE=1 SV=1
1199	2478	sp|O95477|ABCA1_HUMAN	31.97	0	2	0		254300	ATP-binding cassette sub-family A member 1 OS=Homo sapiens GN=ABCA1 PE=1 SV=3
983	10446	sp|Q9H7D0|DOCK5_HUMAN	31.92	1	2	0		215307	Dedicator of cytokinesis protein 5 OS=Homo sapiens GN=DOCK5 PE=1 SV=3
972	5428	sp|P39060|COIA1_HUMAN	31.89	1	2	0		178187	Collagen alpha-1(XVIII) chain OS=Homo sapiens GN=COL18A1 PE=1 SV=5
1082	10466	sp|Q9UM47|NOTC3_HUMAN	31.77	0	2	0		243629	Neurogenic locus notch homolog protein 3 OS=Homo sapiens GN=NOTCH3 PE=1 SV=2
1049	2493	sp|Q2M1P5|KIF7_HUMAN	31.65	1	2	0	Deamidation (NQ)	150587	Kinesin-like protein KIF7 OS=Homo sapiens GN=KIF7 PE=1 SV=2
713	1952	sp|Q9HC35|EMAL4_HUMAN	31.59	1	2	0	Phosphorylation (STY)	108916	Echinoderm microtubule-associated protein-like 4 OS=Homo sapiens GN=EML4 PE=1 SV=3
732	1592	sp|O43424|GRID2_HUMAN	31.26	1	2	0	Deamidation (NQ)	113356	Glutamate receptor ionotropic delta-2 OS=Homo sapiens GN=GRID2 PE=1 SV=2
627	1393	sp|Q9NSI6|BRWD1_HUMAN	31.24	0	2	0		262934	Bromodomain and WD repeat-containing protein 1 OS=Homo sapiens GN=BRWD1 PE=1 SV=4
1002	1101	sp|O75056|SDC3_HUMAN	30.99	2	2	0		45497	Syndecan-3 OS=Homo sapiens GN=SDC3 PE=1 SV=2
1002	1757	sp|Q8TB72|PUM2_HUMAN	30.99	1	2	0		114216	Pumilio homolog 2 OS=Homo sapiens GN=PUM2 PE=1 SV=2
733	2054	sp|P33076|C2TA_HUMAN	30.99	1	2	0		123514	MHC class II transactivator OS=Homo sapiens GN=CIITA PE=1 SV=3
946	10481	sp|P50748|KNTC1_HUMAN	30.98	0	2	0	Phosphorylation (STY)	250746	Kinetochore-associated protein 1 OS=Homo sapiens GN=KNTC1 PE=1 SV=1
1054	2957	sp|Q8NE09|RGS22_HUMAN	30.88	1	2	0	Deamidation (NQ); Phosphorylation (STY)	147163	Regulator of G-protein signaling 22 OS=Homo sapiens GN=RGS22 PE=1 SV=3
1299	1254	sp|Q9Y6R0|NUMBL_HUMAN	30.55	2	2	0	Deamidation (NQ)	64891	Numb-like protein OS=Homo sapiens GN=NUMBL PE=1 SV=1
750	917	sp|Q9UN71|PCDGG_HUMAN	30.54	2	2	0		99927	Protocadherin gamma-B4 OS=Homo sapiens GN=PCDHGB4 PE=2 SV=1
693	1015	sp|P28340|DPOD1_HUMAN	30.46	1	2	0		123631	DNA polymerase delta catalytic subunit OS=Homo sapiens GN=POLD1 PE=1 SV=2
768	974	sp|Q9Y5F6|PCDGM_HUMAN	30.44	2	2	0		101921	Protocadherin gamma-C5 OS=Homo sapiens GN=PCDHGC5 PE=2 SV=1
798	906	sp|Q9Y5F7|PCDGL_HUMAN	30.41	2	2	0		101214	Protocadherin gamma-C4 OS=Homo sapiens GN=PCDHGC4 PE=2 SV=1
1043	1335	sp|Q8TE49|OTU7A_HUMAN	30.39	1	2	0		100677	OTU domain-containing protein 7A OS=Homo sapiens GN=OTUD7A PE=1 SV=1
884	10534	sp|Q9HC84|MUC5B_HUMAN	30.36	0	2	0		596344	Mucin-5B OS=Homo sapiens GN=MUC5B PE=1 SV=3
951	8088	sp|Q9P219|DAPLE_HUMAN	30.29	0	2	0		228228	Protein Daple OS=Homo sapiens GN=CCDC88C PE=1 SV=3
1248	1849	sp|Q66GS9|CP135_HUMAN	30.27	1	2	0		133490	Centrosomal protein of 135 kDa OS=Homo sapiens GN=CEP135 PE=1 SV=2
1098	1544	sp|Q0VG06|FP100_HUMAN	30.26	1	2	0		93433	Fanconi anemia core complex-associated protein 100 OS=Homo sapiens GN=FAAP100 PE=1 SV=3
836	3352	sp|Q8IVF4|DYH10_HUMAN	30.25	0	2	0		514845	Dynein heavy chain 10 axonemal OS=Homo sapiens GN=DNAH10 PE=1 SV=4
800	1372	sp|Q9NR80|ARHG4_HUMAN	30.25	1	2	0		79067	Rho guanine nucleotide exchange factor 4 OS=Homo sapiens GN=ARHGEF4 PE=1 SV=3
575	2158	sp|Q6ZNG2|DBX2_HUMAN	30.25	3	2	0	Phosphorylation (STY)	36555	Homeobox protein DBX2 OS=Homo sapiens GN=DBX2 PE=2 SV=2
1027	9924	sp|Q96JQ0|PCD16_HUMAN	30.21	0	2	0	Deamidation (NQ)	346182	Protocadherin-16 OS=Homo sapiens GN=DCHS1 PE=1 SV=1
812	1595	sp|Q9NR30|DDX21_HUMAN	30.11	1	2	0	Deamidation (NQ)	87344	Nucleolar RNA helicase 2 OS=Homo sapiens GN=DDX21 PE=1 SV=5
1147	10522	sp|Q9P2D1|CHD7_HUMAN	30.02	0	2	0	Phosphorylation (STY)	335928	Chromodomain-helicase-DNA-binding protein 7 OS=Homo sapiens GN=CHD7 PE=1 SV=3
751	1107	sp|Q9UNS1|TIM_HUMAN	29.94	1	2	0		138658	Protein timeless homolog OS=Homo sapiens GN=TIMELESS PE=1 SV=2
1356	1599	sp|Q15398|DLGP5_HUMAN	29.92	1	2	0		95115	Disks large-associated protein 5 OS=Homo sapiens GN=DLGAP5 PE=1 SV=2
1177	2155	sp|Q8TD43|TRPM4_HUMAN	29.88	1	2	0		134301	Transient receptor potential cation channel subfamily M member 4 OS=Homo sapiens GN=TRPM4 PE=1 SV=1
1018	5509	sp|Q7Z4S6|KI21A_HUMAN	29.82	1	2	0		187178	Kinesin-like protein KIF21A OS=Homo sapiens GN=KIF21A PE=1 SV=2
720	7167	sp|Q86XX4|FRAS1_HUMAN	29.76	0	2	0		443217	Extracellular matrix protein FRAS1 OS=Homo sapiens GN=FRAS1 PE=1 SV=2
1096	1099	sp|Q8TC07|TBC15_HUMAN	29.73	1	2	0		79491	TBC1 domain family member 15 OS=Homo sapiens GN=TBC1D15 PE=1 SV=2
944	8755	sp|A6NHR9|SMHD1_HUMAN	29.69	0	2	0		226372	Structural maintenance of chromosomes flexible hinge domain-containing protein 1 OS=Homo sapiens GN=SMCHD1 PE=1 SV=2
1209	10510	sp|Q86YA3|ZGRF1_HUMAN	29.64	0	2	0		236599	Protein ZGRF1 OS=Homo sapiens GN=ZGRF1 PE=1 SV=3
1158	1044	sp|Q659A1|ICE2_HUMAN	29.63	1	2	0		110011	Little elongation complex subunit 2 OS=Homo sapiens GN=ICE2 PE=1 SV=2
852	3076	sp|Q14789|GOGB1_HUMAN	29.62	0	2	0		376019	Golgin subfamily B member 1 OS=Homo sapiens GN=GOLGB1 PE=1 SV=2
1269	5500	sp|Q14966|ZN638_HUMAN	29.61	1	2	0		220623	Zinc finger protein 638 OS=Homo sapiens GN=ZNF638 PE=1 SV=2
1235	1094	sp|O43861|ATP9B_HUMAN	29.53	1	2	0		129303	Probable phospholipid-transporting ATPase IIB OS=Homo sapiens GN=ATP9B PE=2 SV=4
1239	1950	sp|Q96T88|UHRF1_HUMAN	29.49	1	2	0	Phosphorylation (STY)	89814	E3 ubiquitin-protein ligase UHRF1 OS=Homo sapiens GN=UHRF1 PE=1 SV=1
1238	1532	sp|Q92830|KAT2A_HUMAN	29.44	1	2	0	Deamidation (NQ)	93926	Histone acetyltransferase KAT2A OS=Homo sapiens GN=KAT2A PE=1 SV=3
1246	1519	sp|Q15075|EEA1_HUMAN	29.41	1	2	0	Deamidation (NQ)	162465	Early endosome antigen 1 OS=Homo sapiens GN=EEA1 PE=1 SV=2
1044	1390	sp|A6NNC1|P12LL_HUMAN	29.41	1	2	0		94058	Putative POM121-like protein 1-like OS=Homo sapiens PE=5 SV=3
1256	2717	sp|Q5TIE3|VW5B1_HUMAN	29.4	1	2	0		133802	von Willebrand factor A domain-containing protein 5B1 OS=Homo sapiens GN=VWA5B1 PE=1 SV=2
864	8303	sp|Q5HYC2|K2026_HUMAN	29.37	0	2	0	Phosphorylation (STY)	228085	Uncharacterized protein KIAA2026 OS=Homo sapiens GN=KIAA2026 PE=2 SV=2
1110	1954	sp|Q8TES7|FBF1_HUMAN	29.35	1	2	0		125446	Fas-binding factor 1 OS=Homo sapiens GN=FBF1 PE=1 SV=2
892	3470	sp|Q8NEZ4|KMT2C_HUMAN	29.35	0	2	0		541376	Histone-lysine N-methyltransferase 2C OS=Homo sapiens GN=KMT2C PE=1 SV=3
1058	4328	sp|Q01955|CO4A3_HUMAN	29.34	1	2	0		161812	Collagen alpha-3(IV) chain OS=Homo sapiens GN=COL4A3 PE=1 SV=3
1173	1548	sp|Q9Y2K7|KDM2A_HUMAN	29.31	1	2	0		132793	Lysine-specific demethylase 2A OS=Homo sapiens GN=KDM2A PE=1 SV=3
1142	7613	sp|Q8IY92|SLX4_HUMAN	29.3	1	2	0		200010	Structure-specific endonuclease subunit SLX4 OS=Homo sapiens GN=SLX4 PE=1 SV=3
956	1016	sp|Q86UW7|CAPS2_HUMAN	29.29	1	2	0	Deamidation (NQ)	147734	Calcium-dependent secretion activator 2 OS=Homo sapiens GN=CADPS2 PE=1 SV=2
814	1528	sp|Q15311|RBP1_HUMAN	29.26	2	2	0		76064	RalA-binding protein 1 OS=Homo sapiens GN=RALBP1 PE=1 SV=3
1146	9241	sp|Q12756|KIF1A_HUMAN	29.24	1	2	0		191063	Kinesin-like protein KIF1A OS=Homo sapiens GN=KIF1A PE=1 SV=2
921	2942	sp|Q7Z460|CLAP1_HUMAN	29.23	1	2	0	Phosphorylation (STY)	169450	CLIP-associating protein 1 OS=Homo sapiens GN=CLASP1 PE=1 SV=1
888	4956	sp|Q9Y485|DMXL1_HUMAN	29.19	0	2	0		337839	DmX-like protein 1 OS=Homo sapiens GN=DMXL1 PE=1 SV=3
1012	2924	sp|O94964|SOGA1_HUMAN	29.19	1	2	0		159759	Protein SOGA1 OS=Homo sapiens GN=SOGA1 PE=1 SV=2
1207	5828	sp|Q96JP2|MY15B_HUMAN	29.17	1	2	0		167117	Unconventional myosin-XVB OS=Homo sapiens GN=MYO15B PE=1 SV=2
687	8138	sp|Q13085|ACACA_HUMAN	29.16	0	2	0	Deamidation (NQ)	265551	Acetyl-CoA carboxylase 1 OS=Homo sapiens GN=ACACA PE=1 SV=2
680	4059	sp|Q13439|GOGA4_HUMAN	29.16	0	2	0	Deamidation (NQ)	261137	Golgin subfamily A member 4 OS=Homo sapiens GN=GOLGA4 PE=1 SV=1
1183	3623	sp|Q9P2J2|TUTLA_HUMAN	29.15	1	2	0	Phosphorylation (STY)	126580	Protein turtle homolog A OS=Homo sapiens GN=IGSF9 PE=1 SV=2
1236	1173	sp|Q5T5N4|CF118_HUMAN	29.09	2	2	0	Oxidation (M)	53772	Uncharacterized protein C6orf118 OS=Homo sapiens GN=C6orf118 PE=2 SV=1
849	3513	sp|Q63HN8|RN213_HUMAN	28.68	0	2	0		591415	E3 ubiquitin-protein ligase RNF213 OS=Homo sapiens GN=RNF213 PE=1 SV=3
1117	2768	sp|O60343|TBCD4_HUMAN	28.65	1	2	0	Oxidation (M)	146563	TBC1 domain family member 4 OS=Homo sapiens GN=TBC1D4 PE=1 SV=2
1136	6330	sp|Q8TDM6|DLG5_HUMAN	28.64	1	2	0		213866	Disks large homolog 5 OS=Homo sapiens GN=DLG5 PE=1 SV=4
1048	1635	sp|Q8NI08|NCOA7_HUMAN	28.6	1	2	0		106162	Nuclear receptor coactivator 7 OS=Homo sapiens GN=NCOA7 PE=1 SV=2
1359	2163	sp|Q92870|APBB2_HUMAN	28.56	1	2	0	Phosphorylation (STY)	83374	Amyloid beta A4 precursor protein-binding family B member 2 OS=Homo sapiens GN=APBB2 PE=1 SV=3
1247	2662	sp|Q96EN8|MOCOS_HUMAN	28.54	1	2	0	Deamidation (NQ); Phosphorylation (STY)	98120	Molybdenum cofactor sulfurase OS=Homo sapiens GN=MOCOS PE=1 SV=2
1100	1331	sp|Q9Y263|PLAP_HUMAN	28.45	1	2	0		87157	Phospholipase A-2-activating protein OS=Homo sapiens GN=PLAA PE=1 SV=2
1355	2043	sp|Q8N1G4|LRC47_HUMAN	28.42	2	2	0	Phosphorylation (STY)	63473	Leucine-rich repeat-containing protein 47 OS=Homo sapiens GN=LRRC47 PE=1 SV=1
1112	1913	sp|Q00722|PLCB2_HUMAN	28.38	1	2	0	Deamidation (NQ)	134024	1-phosphatidylinositol 4 5-bisphosphate phosphodiesterase beta-2 OS=Homo sapiens GN=PLCB2 PE=1 SV=2
1013	3390	sp|P53420|CO4A4_HUMAN	28.38	1	2	0	Deamidation (NQ)	164037	Collagen alpha-4(IV) chain OS=Homo sapiens GN=COL4A4 PE=1 SV=3
1357	1338	sp|Q2TBA0|KLH40_HUMAN	28.37	2	2	0		69257	Kelch-like protein 40 OS=Homo sapiens GN=KLHL40 PE=1 SV=2
1046	1684	sp|Q7Z553|MDGA2_HUMAN	28.36	1	2	0		107436	MAM domain-containing glycosylphosphatidylinositol anchor protein 2 OS=Homo sapiens GN=MDGA2 PE=1 SV=2
871	4660	sp|Q8TE73|DYH5_HUMAN	28.3	0	2	0		529026	Dynein heavy chain 5 axonemal OS=Homo sapiens GN=DNAH5 PE=1 SV=3
1172	1674	sp|Q9H3T3|SEM6B_HUMAN	28.29	1	2	0		95285	Semaphorin-6B OS=Homo sapiens GN=SEMA6B PE=1 SV=4
970	5268	sp|Q9P227|RHG23_HUMAN	28.29	1	2	0	Deamidation (NQ)	162191	Rho GTPase-activating protein 23 OS=Homo sapiens GN=ARHGAP23 PE=1 SV=2
940	3449	sp|Q5UIP0|RIF1_HUMAN	28.28	0	2	0	Phosphorylation (STY)	274464	Telomere-associated protein RIF1 OS=Homo sapiens GN=RIF1 PE=1 SV=2
1205	6975	sp|Q9P2F8|SI1L2_HUMAN	28.27	1	2	0		190436	Signal-induced proliferation-associated 1-like protein 2 OS=Homo sapiens GN=SIPA1L2 PE=1 SV=2
625	1019	sp|P20648|ATP4A_HUMAN	28.24	1	2	0		114119	Potassium-transporting ATPase alpha chain 1 OS=Homo sapiens GN=ATP4A PE=2 SV=5
625	904	sp|P54707|AT12A_HUMAN	28.24	1	2	0		115510	Potassium-transporting ATPase alpha chain 2 OS=Homo sapiens GN=ATP12A PE=1 SV=3
1034	6519	sp|Q8NDV7|TNR6A_HUMAN	28.23	1	2	0	Deamidation (NQ)	210296	Trinucleotide repeat-containing gene 6A protein OS=Homo sapiens GN=TNRC6A PE=1 SV=2
1008	2441	sp|Q9UQE7|SMC3_HUMAN	28.2	1	2	0	Oxidation (M)	141541	Structural maintenance of chromosomes protein 3 OS=Homo sapiens GN=SMC3 PE=1 SV=2
1261	3397	sp|Q9Y6M7|S4A7_HUMAN	28.19	1	2	0		136044	Sodium bicarbonate cotransporter 3 OS=Homo sapiens GN=SLC4A7 PE=1 SV=2
1071	6681	sp|Q01668|CAC1D_HUMAN	28.18	0	2	0	Deamidation (NQ)	245139	Voltage-dependent L-type calcium channel subunit alpha-1D OS=Homo sapiens GN=CACNA1D PE=1 SV=2
966	3318	sp|P08572|CO4A2_HUMAN	28.16	1	2	0		167553	Collagen alpha-2(IV) chain OS=Homo sapiens GN=COL4A2 PE=1 SV=4
1009	2085	sp|P05997|CO5A2_HUMAN	28.16	1	2	0		144910	Collagen alpha-2(V) chain OS=Homo sapiens GN=COL5A2 PE=1 SV=3
1377	3522	sp|Q09MP3|R51A2_HUMAN	28.11	1	2	0	Oxidation (M)	133907	RAD51-associated protein 2 OS=Homo sapiens GN=RAD51AP2 PE=1 SV=1
1178	2092	sp|Q9ULK0|GRID1_HUMAN	28.06	1	2	0	Deamidation (NQ); Phosphorylation (STY)	112131	Glutamate receptor ionotropic delta-1 OS=Homo sapiens GN=GRID1 PE=2 SV=2
873	5792	sp|Q8IZQ1|WDFY3_HUMAN	28.05	0	2	0	Oxidation (M); Phosphorylation (STY)	395260	WD repeat and FYVE domain-containing protein 3 OS=Homo sapiens GN=WDFY3 PE=1 SV=2
1326	4523	sp|Q4VCS5|AMOT_HUMAN	28.03	1	2	0	Phosphorylation (STY)	118085	Angiomotin OS=Homo sapiens GN=AMOT PE=1 SV=1
931	1268	sp|Q86US8|EST1A_HUMAN	28.02	1	2	0		160461	Telomerase-binding protein EST1A OS=Homo sapiens GN=SMG6 PE=1 SV=2
869	3234	sp|Q9NYQ7|CELR3_HUMAN	28.01	0	2	0	Phosphorylation (STY)	358186	Cadherin EGF LAG seven-pass G-type receptor 3 OS=Homo sapiens GN=CELSR3 PE=1 SV=2
704	4505	sp|Q15811|ITSN1_HUMAN	27.99	1	2	0	Deamidation (NQ)	195420	Intersectin-1 OS=Homo sapiens GN=ITSN1 PE=1 SV=3
962	2119	sp|Q8TF62|AT8B4_HUMAN	27.96	1	2	0		135868	Probable phospholipid-transporting ATPase IM OS=Homo sapiens GN=ATP8B4 PE=1 SV=3
1368	2617	sp|Q96MX3|ZNF48_HUMAN	27.94	2	2	0	Phosphorylation (STY)	67820	Zinc finger protein 48 OS=Homo sapiens GN=ZNF48 PE=1 SV=2
651	3215	sp|Q92620|PRP16_HUMAN	27.92	1	2	0	Phosphorylation (STY)	140502	Pre-mRNA-splicing factor ATP-dependent RNA helicase PRP16 OS=Homo sapiens GN=DHX38 PE=1 SV=2
1101	1723	sp|Q8N944|AMER3_HUMAN	27.86	1	2	0	Phosphorylation (STY)	90445	APC membrane recruitment protein 3 OS=Homo sapiens GN=AMER3 PE=1 SV=2
1180	2018	sp|O94989|ARHGF_HUMAN	27.85	1	2	0		91940	Rho guanine nucleotide exchange factor 15 OS=Homo sapiens GN=ARHGEF15 PE=1 SV=4
1019	2611	sp|O60706|ABCC9_HUMAN	27.83	1	2	0		174222	ATP-binding cassette sub-family C member 9 OS=Homo sapiens GN=ABCC9 PE=1 SV=2
982	7875	sp|Q96PE2|ARHGH_HUMAN	27.82	0	2	0	Phosphorylation (STY)	221671	Rho guanine nucleotide exchange factor 17 OS=Homo sapiens GN=ARHGEF17 PE=1 SV=1
1253	2445	sp|P29590|PML_HUMAN	27.79	1	2	0	Deamidation (NQ)	97551	Protein PML OS=Homo sapiens GN=PML PE=1 SV=3
901	9564	sp|O43497|CAC1G_HUMAN	27.77	0	2	0	Phosphorylation (STY)	262469	Voltage-dependent T-type calcium channel subunit alpha-1G OS=Homo sapiens GN=CACNA1G PE=1 SV=3
1304	1301	sp|Q8NAF0|ZN579_HUMAN	27.73	2	2	0		60509	Zinc finger protein 579 OS=Homo sapiens GN=ZNF579 PE=1 SV=2
1373	2368	sp|Q6EKJ0|GTD2B_HUMAN	27.73	1	2	0		107233	General transcription factor II-I repeat domain-containing protein 2B OS=Homo sapiens GN=GTF2IRD2B PE=1 SV=1
1373	2369	sp|Q86UP8|GTD2A_HUMAN	27.73	1	2	0		107231	General transcription factor II-I repeat domain-containing protein 2A OS=Homo sapiens GN=GTF2IRD2 PE=1 SV=2
663	2161	sp|O75665|OFD1_HUMAN	27.7	1	2	0	Phosphorylation (STY)	116671	Oral-facial-digital syndrome 1 protein OS=Homo sapiens GN=OFD1 PE=1 SV=1
599	3327	sp|Q5T4S7|UBR4_HUMAN	27.7	0	2	0	Deamidation (NQ)	573849	E3 ubiquitin-protein ligase UBR4 OS=Homo sapiens GN=UBR4 PE=1 SV=1
922	2211	sp|Q14689|DIP2A_HUMAN	27.69	1	2	0		170368	Disco-interacting protein 2 homolog A OS=Homo sapiens GN=DIP2A PE=1 SV=2
776	1990	sp|P32418|NAC1_HUMAN	27.6	1	2	0		108547	Sodium/calcium exchanger 1 OS=Homo sapiens GN=SLC8A1 PE=1 SV=3
760	2389	sp|Q8NB14|UBP38_HUMAN	27.58	1	2	0		116546	Ubiquitin carboxyl-terminal hydrolase 38 OS=Homo sapiens GN=USP38 PE=1 SV=2
738	4632	sp|Q8IZY2|ABCA7_HUMAN	27.56	0	2	0		234347	ATP-binding cassette sub-family A member 7 OS=Homo sapiens GN=ABCA7 PE=1 SV=3
1274	6937	sp|O95248|MTMR5_HUMAN	27.5	1	2	0		208314	Myotubularin-related protein 5 OS=Homo sapiens GN=SBF1 PE=1 SV=3
1254	2553	sp|Q15042|RB3GP_HUMAN	27.5	1	2	0		110524	Rab3 GTPase-activating protein catalytic subunit OS=Homo sapiens GN=RAB3GAP1 PE=1 SV=3
954	9120	sp|Q7Z408|CSMD2_HUMAN	27.48	0	2	0	Deamidation (NQ); Phosphorylation (STY)	380040	CUB and sushi domain-containing protein 2 OS=Homo sapiens GN=CSMD2 PE=1 SV=2
1311	1735	sp|Q5R3F8|PPR29_HUMAN	27.46	1	2	0		89687	Protein phosphatase 1 regulatory subunit 29 OS=Homo sapiens GN=ELFN2 PE=1 SV=1
781	6834	sp|Q14160|SCRIB_HUMAN	27.42	1	2	0	Phosphorylation (STY)	174884	Protein scribble homolog OS=Homo sapiens GN=SCRIB PE=1 SV=4
1270	5616	sp|Q86UL8|MAGI2_HUMAN	27.39	1	2	0		158754	Membrane-associated guanylate kinase WW and PDZ domain-containing protein 2 OS=Homo sapiens GN=MAGI2 PE=1 SV=3
1384	6064	sp|Q2M1Z3|RHG31_HUMAN	27.33	1	2	0		156984	Rho GTPase-activating protein 31 OS=Homo sapiens GN=ARHGAP31 PE=1 SV=2
654	5300	sp|Q9HCU4|CELR2_HUMAN	27.24	0	2	0		317453	Cadherin EGF LAG seven-pass G-type receptor 2 OS=Homo sapiens GN=CELSR2 PE=1 SV=1
736	3606	sp|Q8TEM1|PO210_HUMAN	27.23	1	2	0	Phosphorylation (STY)	205109	Nuclear pore membrane glycoprotein 210 OS=Homo sapiens GN=NUP210 PE=1 SV=3
735	2391	sp|Q9H0E3|SP130_HUMAN	27.23	1	2	0		110324	Histone deacetylase complex subunit SAP130 OS=Homo sapiens GN=SAP130 PE=1 SV=1
949	5658	sp|Q16787|LAMA3_HUMAN	27.22	0	2	0		366650	Laminin subunit alpha-3 OS=Homo sapiens GN=LAMA3 PE=1 SV=2
775	2159	sp|Q8IW35|CEP97_HUMAN	27.21	1	2	0	Phosphorylation (STY)	96981	Centrosomal protein of 97 kDa OS=Homo sapiens GN=CEP97 PE=1 SV=1
1268	3096	sp|Q7Z4L5|TT21B_HUMAN	27.19	1	2	0	Deamidation (NQ)	150936	Tetratricopeptide repeat protein 21B OS=Homo sapiens GN=TTC21B PE=1 SV=2
936	2392	sp|Q9UHB7|AFF4_HUMAN	27.17	1	2	0		127459	AF4/FMR2 family member 4 OS=Homo sapiens GN=AFF4 PE=1 SV=1
881	3393	sp|P21817|RYR1_HUMAN	27.17	0	2	0	Deamidation (NQ)	565184	Ryanodine receptor 1 OS=Homo sapiens GN=RYR1 PE=1 SV=3
881	2694	sp|Q5HY64|FA47C_HUMAN	27.17	1	2	0	Deamidation (NQ)	115338	Putative protein FAM47C OS=Homo sapiens GN=FAM47C PE=2 SV=1
1065	3743	sp|Q86XA9|HTR5A_HUMAN	27.13	0	2	0		222002	HEAT repeat-containing protein 5A OS=Homo sapiens GN=HEATR5A PE=1 SV=2
960	2042	sp|P82094|TMF1_HUMAN	27.11	1	2	0		122842	TATA element modulatory factor OS=Homo sapiens GN=TMF1 PE=1 SV=2
1251	1841	sp|O60284|ST18_HUMAN	27.07	1	2	0	Deamidation (NQ)	115155	Suppression of tumorigenicity 18 protein OS=Homo sapiens GN=ST18 PE=1 SV=1
914	10532	sp|Q9UKN7|MYO15_HUMAN	27.04	0	2	0	Phosphorylation (STY)	395294	Unconventional myosin-XV OS=Homo sapiens GN=MYO15A PE=1 SV=2
1353	1285	sp|Q9UH36|SRR1L_HUMAN	26.98	3	2	0		38573	SRR1-like protein OS=Homo sapiens GN=SRRD PE=2 SV=1
965	2069	sp|Q13936|CAC1C_HUMAN	26.97	0	2	0	Deamidation (NQ)	248974	Voltage-dependent L-type calcium channel subunit alpha-1C OS=Homo sapiens GN=CACNA1C PE=1 SV=4
1133	10390	sp|Q8WWZ7|ABCA5_HUMAN	26.95	1	2	0	Phosphorylation (STY)	186506	ATP-binding cassette sub-family A member 5 OS=Homo sapiens GN=ABCA5 PE=2 SV=2
891	4681	sp|Q9P225|DYH2_HUMAN	26.89	0	2	0		507703	Dynein heavy chain 2 axonemal OS=Homo sapiens GN=DNAH2 PE=2 SV=3
1047	1315	sp|Q9NZQ3|SPN90_HUMAN	26.87	1	2	0		78960	NCK-interacting protein with SH3 domain OS=Homo sapiens GN=NCKIPSD PE=1 SV=1
978	8949	sp|Q6P0Q8|MAST2_HUMAN	26.87	1	2	0	Phosphorylation (STY)	196434	Microtubule-associated serine/threonine-protein kinase 2 OS=Homo sapiens GN=MAST2 PE=1 SV=2
981	9458	sp|Q9P2D3|HTR5B_HUMAN	26.86	0	2	0		224300	HEAT repeat-containing protein 5B OS=Homo sapiens GN=HEATR5B PE=1 SV=2
1135	4870	sp|Q9Y2H9|MAST1_HUMAN	26.86	1	2	0		170676	Microtubule-associated serine/threonine-protein kinase 1 OS=Homo sapiens GN=MAST1 PE=1 SV=2
942	2666	sp|Q9BZC7|ABCA2_HUMAN	26.85	0	2	0		269870	ATP-binding cassette sub-family A member 2 OS=Homo sapiens GN=ABCA2 PE=1 SV=3
1160	1199	sp|Q96QD9|UIF_HUMAN	26.83	3	2	0	Deamidation (NQ)	35818	UAP56-interacting factor OS=Homo sapiens GN=FYTTD1 PE=1 SV=3
1075	4100	sp|Q9H2D6|TARA_HUMAN	26.81	0	2	0		261373	TRIO and F-actin-binding protein OS=Homo sapiens GN=TRIOBP PE=1 SV=3
1097	1152	sp|O43741|AAKB2_HUMAN	26.8	4	2	0		30302	5'-AMP-activated protein kinase subunit beta-2 OS=Homo sapiens GN=PRKAB2 PE=1 SV=1
930	5834	sp|Q0VDD8|DYH14_HUMAN	26.75	0	2	0	Oxidation (M)	399896	Dynein heavy chain 14 axonemal OS=Homo sapiens GN=DNAH14 PE=2 SV=3
1179	4054	sp|Q96KM6|Z512B_HUMAN	26.73	1	2	0	Phosphorylation (STY)	97264	Zinc finger protein 512B OS=Homo sapiens GN=ZNF512B PE=1 SV=1
872	4427	sp|Q96N23|CFA54_HUMAN	26.66	0	2	0	Phosphorylation (STY)	351970	Cilia- and flagella-associated protein 54 OS=Homo sapiens GN=CFAP54 PE=2 SV=3
1360	1440	sp|Q9NZQ8|TRPM5_HUMAN	26.64	1	2	0		131451	Transient receptor potential cation channel subfamily M member 5 OS=Homo sapiens GN=TRPM5 PE=2 SV=1
1021	5320	sp|P56715|RP1_HUMAN	26.63	0	2	0	Phosphorylation (STY)	240659	Oxygen-regulated protein 1 OS=Homo sapiens GN=RP1 PE=1 SV=1
1187	3416	sp|B1AJZ9|FHAD1_HUMAN	26.6	1	2	0		161903	Forkhead-associated domain-containing protein 1 OS=Homo sapiens GN=FHAD1 PE=2 SV=2
1316	1778	sp|Q96M91|CFA53_HUMAN	26.59	2	2	0	Phosphorylation (STY)	61835	Cilia- and flagella-associated protein 53 OS=Homo sapiens GN=CFAP53 PE=1 SV=2
1007	2350	sp|Q9P1Z0|ZBTB4_HUMAN	26.55	1	2	0		105114	Zinc finger and BTB domain-containing protein 4 OS=Homo sapiens GN=ZBTB4 PE=1 SV=3
997	1063	sp|P28329|CLAT_HUMAN	26.51	1	2	0	Deamidation (NQ); Oxidation (M)	82536	Choline O-acetyltransferase OS=Homo sapiens GN=CHAT PE=1 SV=4
1241	1112	sp|Q9UNQ0|ABCG2_HUMAN	26.5	2	2	0		72314	ATP-binding cassette sub-family G member 2 OS=Homo sapiens GN=ABCG2 PE=1 SV=3
1273	7199	sp|Q702N8|XIRP1_HUMAN	26.48	1	2	0	Phosphorylation (STY)	198559	Xin actin-binding repeat-containing protein 1 OS=Homo sapiens GN=XIRP1 PE=1 SV=1
1063	2414	sp|Q92887|MRP2_HUMAN	26.42	1	2	0	Deamidation (NQ); Phosphorylation (STY)	174206	Canalicular multispecific organic anion transporter 1 OS=Homo sapiens GN=ABCC2 PE=1 SV=3
1016	3484	sp|Q9UPP5|K1107_HUMAN	26.41	1	2	0	Deamidation (NQ)	155681	Uncharacterized protein KIAA1107 OS=Homo sapiens GN=KIAA1107 PE=1 SV=2
1176	2841	sp|Q8TF61|FBX41_HUMAN	26.39	1	2	0	Phosphorylation (STY)	94496	F-box only protein 41 OS=Homo sapiens GN=FBXO41 PE=2 SV=5
910	10141	sp|Q9NYQ8|FAT2_HUMAN	26.38	0	2	0		479321	Protocadherin Fat 2 OS=Homo sapiens GN=FAT2 PE=1 SV=2
1182	1823	sp|P29320|EPHA3_HUMAN	26.34	1	2	0		110131	Ephrin type-A receptor 3 OS=Homo sapiens GN=EPHA3 PE=1 SV=2
1122	2925	sp|Q52LW3|RHG29_HUMAN	26.33	1	2	0		142063	Rho GTPase-activating protein 29 OS=Homo sapiens GN=ARHGAP29 PE=1 SV=2
1137	6663	sp|Q9Y2I7|FYV1_HUMAN	26.26	0	2	0	Phosphorylation (STY)	237134	1-phosphatidylinositol 3-phosphate 5-kinase OS=Homo sapiens GN=PIKFYVE PE=1 SV=3
1174	1791	sp|Q6UXK2|ISLR2_HUMAN	26.25	1	2	0		78990	Immunoglobulin superfamily containing leucine-rich repeat protein 2 OS=Homo sapiens GN=ISLR2 PE=2 SV=1
1367	1437	sp|P48454|PP2BC_HUMAN	26.24	3	2	0		58129	Serine/threonine-protein phosphatase 2B catalytic subunit gamma isoform OS=Homo sapiens GN=PPP3CC PE=1 SV=3
1250	4404	sp|Q9H3D4|P63_HUMAN	26.21	1	2	0	Phosphorylation (STY)	76785	Tumor protein 63 OS=Homo sapiens GN=TP63 PE=1 SV=1
969	6280	sp|P10586|PTPRF_HUMAN	26.18	1	2	0	Phosphorylation (STY)	212877	Receptor-type tyrosine-protein phosphatase F OS=Homo sapiens GN=PTPRF PE=1 SV=2
1059	3022	sp|P04920|B3A2_HUMAN	26.13	1	2	0		137009	Anion exchange protein 2 OS=Homo sapiens GN=SLC4A2 PE=1 SV=4
1170	1530	sp|Q9NQB0|TF7L2_HUMAN	26.09	2	2	0		67919	Transcription factor 7-like 2 OS=Homo sapiens GN=TCF7L2 PE=1 SV=2
1077	6165	sp|Q5VWN6|F208B_HUMAN	26.07	0	2	0		268840	Protein FAM208B OS=Homo sapiens GN=FAM208B PE=1 SV=1
853	3314	sp|Q9NU22|MDN1_HUMAN	26.04	0	2	0	Oxidation (M)	632827	Midasin OS=Homo sapiens GN=MDN1 PE=1 SV=2
1378	5453	sp|Q9NX05|F120C_HUMAN	26.02	1	2	0	Phosphorylation (STY)	120588	Constitutive coactivator of PPAR-gamma-like protein 2 OS=Homo sapiens GN=FAM120C PE=2 SV=3
1309	1317	sp|Q9ULU8|CAPS1_HUMAN	26.01	1	2	0		152786	Calcium-dependent secretion activator 1 OS=Homo sapiens GN=CADPS PE=1 SV=3
950	7231	sp|Q8NF50|DOCK8_HUMAN	26	0	2	0		238527	Dedicator of cytokinesis protein 8 OS=Homo sapiens GN=DOCK8 PE=1 SV=3
1233	951	sp|Q96MG2|JSPR1_HUMAN	25.99	4	2	0	Deamidation (NQ)	36319	Junctional sarcoplasmic reticulum protein 1 OS=Homo sapiens GN=JSRP1 PE=1 SV=1
1175	1624	sp|A6NGR9|MROH6_HUMAN	25.98	2	2	0		77186	Maestro heat-like repeat-containing protein family member 6 OS=Homo sapiens GN=MROH6 PE=4 SV=2
1171	1794	sp|Q14781|CBX2_HUMAN	25.97	2	2	0	Phosphorylation (STY)	56081	Chromobox protein homolog 2 OS=Homo sapiens GN=CBX2 PE=1 SV=2
1118	2682	sp|O75808|CAN15_HUMAN	25.9	1	2	0		117314	Calpain-15 OS=Homo sapiens GN=CAPN15 PE=1 SV=1
1185	2851	sp|Q5M775|CYTSB_HUMAN	25.87	1	2	0		118585	Cytospin-B OS=Homo sapiens GN=SPECC1 PE=1 SV=1
1213	5395	sp|Q8N3C0|ASCC3_HUMAN	25.85	0	2	0	Phosphorylation (STY)	251458	Activating signal cointegrator 1 complex subunit 3 OS=Homo sapiens GN=ASCC3 PE=1 SV=3
1108	1858	sp|O95831|AIFM1_HUMAN	25.84	2	2	0	Deamidation (NQ)	66901	Apoptosis-inducing factor 1 mitochondrial OS=Homo sapiens GN=AIFM1 PE=1 SV=1
1362	1507	sp|Q5T7V8|GORAB_HUMAN	25.73	3	2	0		44993	RAB6-interacting golgin OS=Homo sapiens GN=GORAB PE=1 SV=1
1375	2781	sp|O00192|ARVC_HUMAN	25.72	1	2	0		104642	Armadillo repeat protein deleted in velo-cardio-facial syndrome OS=Homo sapiens GN=ARVCF PE=1 SV=1
1120	2621	sp|Q8TEW8|PAR3L_HUMAN	25.62	1	2	0		132494	Partitioning defective 3 homolog B OS=Homo sapiens GN=PARD3B PE=1 SV=2
1249	2200	sp|Q9H579|MROH8_HUMAN	25.59	2	2	0	Deamidation (NQ); Phosphorylation (STY)	54817	Protein MROH8 OS=Homo sapiens GN=MROH8 PE=2 SV=2
1000	5486	sp|Q96T37|RBM15_HUMAN	25.57	1	2	0	Phosphorylation (STY)	107188	Putative RNA-binding protein 15 OS=Homo sapiens GN=RBM15 PE=1 SV=2
1189	2690	sp|Q9H0E9|BRD8_HUMAN	25.56	1	2	0		135336	Bromodomain-containing protein 8 OS=Homo sapiens GN=BRD8 PE=1 SV=2
912	3081	sp|Q8NCM8|DYHC2_HUMAN	25.52	0	2	0	Phosphorylation (STY)	492627	Cytoplasmic dynein 2 heavy chain 1 OS=Homo sapiens GN=DYNC2H1 PE=1 SV=4
1372	1918	sp|P28472|GBRB3_HUMAN	25.48	2	2	0		54116	Gamma-aminobutyric acid receptor subunit beta-3 OS=Homo sapiens GN=GABRB3 PE=1 SV=1
1369	1701	sp|Q6QEF8|CORO6_HUMAN	25.47	2	2	0	Carbamidomethylation	52762	Coronin-6 OS=Homo sapiens GN=CORO6 PE=1 SV=2
1257	1898	sp|Q96NW7|LRRC7_HUMAN	25.44	1	2	0	Deamidation (NQ)	172580	Leucine-rich repeat-containing protein 7 OS=Homo sapiens GN=LRRC7 PE=1 SV=1
1181	1979	sp|P55291|CAD15_HUMAN	25.27	1	2	0		88916	Cadherin-15 OS=Homo sapiens GN=CDH15 PE=1 SV=1
1331	4194	sp|Q8IUX7|AEBP1_HUMAN	25.25	1	2	0		130929	Adipocyte enhancer-binding protein 1 OS=Homo sapiens GN=AEBP1 PE=1 SV=1
911	6452	sp|Q8NDH2|CC168_HUMAN	25.22	0	2	0		277949	Coiled-coil domain-containing protein 168 OS=Homo sapiens GN=CCDC168 PE=2 SV=2
899	9516	sp|Q5TH69|BIG3_HUMAN	25.21	0	2	0	Phosphorylation (STY)	240649	Brefeldin A-inhibited guanine nucleotide-exchange protein 3 OS=Homo sapiens GN=ARFGEF3 PE=1 SV=3
1210	10523	sp|Q9NTG1|PKDRE_HUMAN	25.16	0	2	0		255447	Polycystic kidney disease and receptor for egg jelly-related protein OS=Homo sapiens GN=PKDREJ PE=2 SV=2
1005	2178	sp|O60447|EVI5_HUMAN	25.12	1	2	0	Deamidation (NQ)	92949	Ecotropic viral integration site 5 protein homolog OS=Homo sapiens GN=EVI5 PE=1 SV=3
1014	3262	sp|O95342|ABCBB_HUMAN	25.09	1	2	0		146407	Bile salt export pump OS=Homo sapiens GN=ABCB11 PE=1 SV=2
1109	3934	sp|P38432|COIL_HUMAN	25.04	2	2	0	Phosphorylation (STY)	62608	Coilin OS=Homo sapiens GN=COIL PE=1 SV=1
984	9551	sp|O95180|CAC1H_HUMAN	25.02	0	2	0	Phosphorylation (STY)	259160	Voltage-dependent T-type calcium channel subunit alpha-1H OS=Homo sapiens GN=CACNA1H PE=1 SV=4
1115	2030	sp|Q7Z2K8|GRIN1_HUMAN	24.93	1	2	0		102399	G protein-regulated inducer of neurite outgrowth 1 OS=Homo sapiens GN=GPRIN1 PE=1 SV=2
1130	3581	sp|Q9HD20|AT131_HUMAN	24.86	1	2	0		132955	Manganese-transporting ATPase 13A1 OS=Homo sapiens GN=ATP13A1 PE=1 SV=2
1324	1940	sp|O14772|FPGT_HUMAN	24.72	2	2	0		66599	Fucose-1-phosphate guanylyltransferase OS=Homo sapiens GN=FPGT PE=1 SV=2
1020	5640	sp|O95347|SMC2_HUMAN	24.72	1	2	0	Phosphorylation (STY)	135656	Structural maintenance of chromosomes protein 2 OS=Homo sapiens GN=SMC2 PE=1 SV=2
987	9582	sp|O95785|WIZ_HUMAN	24.53	1	2	0		178673	Protein Wiz OS=Homo sapiens GN=WIZ PE=1 SV=2
1069	5538	sp|Q9BY66|KDM5D_HUMAN	24.48	1	2	0	Phosphorylation (STY)	174072	Lysine-specific demethylase 5D OS=Homo sapiens GN=KDM5D PE=1 SV=2
1068	3724	sp|O60732|MAGC1_HUMAN	24.45	1	2	0		123643	Melanoma-associated antigen C1 OS=Homo sapiens GN=MAGEC1 PE=1 SV=3
874	6149	sp|Q96M86|DNHD1_HUMAN	24.44	0	2	0	Phosphorylation (STY)	533650	Dynein heavy chain domain-containing protein 1 OS=Homo sapiens GN=DNHD1 PE=2 SV=2
985	7266	sp|Q96T58|MINT_HUMAN	24.4	0	2	0		402251	Msx2-interacting protein OS=Homo sapiens GN=SPEN PE=1 SV=1
1260	2245	sp|Q8WWK9|CKAP2_HUMAN	24.36	1	2	0		76987	Cytoskeleton-associated protein 2 OS=Homo sapiens GN=CKAP2 PE=1 SV=1
971	4545	sp|P00519|ABL1_HUMAN	24.34	1	2	0	Phosphorylation (STY)	122872	Tyrosine-protein kinase ABL1 OS=Homo sapiens GN=ABL1 PE=1 SV=4
1202	4277	sp|Q9ULD9|ZN608_HUMAN	24.32	1	2	0	Phosphorylation (STY)	162208	Zinc finger protein 608 OS=Homo sapiens GN=ZNF608 PE=1 SV=4
821	1604	sp|Q9H583|HEAT1_HUMAN	24.27	1	2	0		242368	HEAT repeat-containing protein 1 OS=Homo sapiens GN=HEATR1 PE=1 SV=3
1263	2344	sp|O94874|UFL1_HUMAN	24.24	1	2	0	Oxidation (M)	89595	E3 UFM1-protein ligase 1 OS=Homo sapiens GN=UFL1 PE=1 SV=2
1218	8590	sp|Q7Z7M0|MEGF8_HUMAN	24.24	0	2	0	Deamidation (NQ)	303100	Multiple epidermal growth factor-like domains protein 8 OS=Homo sapiens GN=MEGF8 PE=1 SV=2
1024	4953	sp|Q9UPS8|ANR26_HUMAN	24.23	1	2	0	Phosphorylation (STY)	196322	Ankyrin repeat domain-containing protein 26 OS=Homo sapiens GN=ANKRD26 PE=1 SV=3
1266	2220	sp|Q8NDZ0|BEND2_HUMAN	24.03	1	2	0		87919	BEN domain-containing protein 2 OS=Homo sapiens GN=BEND2 PE=2 SV=2
1030	3672	sp|A4UGR9|XIRP2_HUMAN	23.8	0	2	0	Phosphorylation (STY)	382302	Xin actin-binding repeat-containing protein 2 OS=Homo sapiens GN=XIRP2 PE=1 SV=2
862	2843	sp|Q9UQ35|SRRM2_HUMAN	23.79	0	2	0	Phosphorylation (STY)	299616	Serine/arginine repetitive matrix protein 2 OS=Homo sapiens GN=SRRM2 PE=1 SV=2
862	4818	sp|Q9Y2K6|UBP20_HUMAN	23.79	1	2	0	Phosphorylation (STY)	102003	Ubiquitin carboxyl-terminal hydrolase 20 OS=Homo sapiens GN=USP20 PE=1 SV=2
1025	5872	sp|Q96JM4|LRIQ1_HUMAN	23.77	1	2	0	Phosphorylation (STY)	199299	Leucine-rich repeat and IQ domain-containing protein 1 OS=Homo sapiens GN=LRRIQ1 PE=2 SV=3
882	4272	sp|O15230|LAMA5_HUMAN	23.77	0	2	0		399740	Laminin subunit alpha-5 OS=Homo sapiens GN=LAMA5 PE=1 SV=8
1192	2779	sp|O75146|HIP1R_HUMAN	23.69	1	2	0		119388	Huntingtin-interacting protein 1-related protein OS=Homo sapiens GN=HIP1R PE=1 SV=2
1330	2697	sp|Q9H7U1|CCSE2_HUMAN	23.68	1	2	0		93548	Serine-rich coiled-coil domain-containing protein 2 OS=Homo sapiens GN=CCSER2 PE=1 SV=2
880	3453	sp|O00370|LORF2_HUMAN	23.68	1	2	0	Phosphorylation (STY)	149011	LINE-1 retrotransposable element ORF2 protein OS=Homo sapiens PE=1 SV=1
880	5100	sp|A2RUR9|C144A_HUMAN	23.68	1	2	0	Phosphorylation (STY)	165124	Coiled-coil domain-containing protein 144A OS=Homo sapiens GN=CCDC144A PE=2 SV=1
1265	1813	sp|Q9Y6A1|POMT1_HUMAN	23.65	1	2	0		84881	Protein O-mannosyl-transferase 1 OS=Homo sapiens GN=POMT1 PE=1 SV=3
1383	3363	sp|Q6ZMT9|DTHD1_HUMAN	23.65	1	2	0	Oxidation (M)	88329	Death domain-containing protein 1 OS=Homo sapiens GN=DTHD1 PE=2 SV=3
1271	3114	sp|Q6UXM1|LRIG3_HUMAN	23.57	1	2	0		123434	Leucine-rich repeats and immunoglobulin-like domains protein 3 OS=Homo sapiens GN=LRIG3 PE=2 SV=1
1060	3382	sp|Q5K651|SAMD9_HUMAN	23.57	1	2	0		184280	Sterile alpha motif domain-containing protein 9 OS=Homo sapiens GN=SAMD9 PE=1 SV=1
1080	6627	sp|Q8WWQ0|PHIP_HUMAN	23.49	1	2	0	Phosphorylation (STY)	206688	PH-interacting protein OS=Homo sapiens GN=PHIP PE=1 SV=2
905	2002	sp|Q2VIQ3|KIF4B_HUMAN	23.46	1	2	0		140035	Chromosome-associated kinesin KIF4B OS=Homo sapiens GN=KIF4B PE=2 SV=2
1198	3223	sp|P11168|GTR2_HUMAN	23.44	2	2	0		57490	Solute carrier family 2 facilitated glucose transporter member 2 OS=Homo sapiens GN=SLC2A2 PE=1 SV=1
1197	4223	sp|Q96PE1|AGRA2_HUMAN	23.34	1	2	0		142647	Adhesion G protein-coupled receptor A2 OS=Homo sapiens GN=ADGRA2 PE=1 SV=2
1329	3228	sp|Q8WTT2|NOC3L_HUMAN	23.18	1	2	0		92548	Nucleolar complex protein 3 homolog OS=Homo sapiens GN=NOC3L PE=1 SV=1
1272	7634	sp|Q86VF7|NRAP_HUMAN	22.97	1	2	0		197073	Nebulin-related-anchoring protein OS=Homo sapiens GN=NRAP PE=1 SV=2
1134	6017	sp|P21860|ERBB3_HUMAN	22.73	1	2	0		148098	Receptor tyrosine-protein kinase erbB-3 OS=Homo sapiens GN=ERBB3 PE=1 SV=1
467	750	sp|O14817|TSN4_HUMAN	58.14	11	1	1	Deamidation (NQ)	26118	Tetraspanin-4 OS=Homo sapiens GN=TSPAN4 PE=1 SV=1
1225	727	sp|Q16881|TRXR1_HUMAN	52.88	4	1	1		70906	Thioredoxin reductase 1 cytoplasmic OS=Homo sapiens GN=TXNRD1 PE=1 SV=3
414	713	sp|P02749|APOH_HUMAN	52.34	3	1	1		38298	Beta-2-glycoprotein 1 OS=Homo sapiens GN=APOH PE=1 SV=3
528	714	sp|P02748|CO9_HUMAN	50.44	2	1	1		63173	Complement component C9 OS=Homo sapiens GN=C9 PE=1 SV=2
1090	681	sp|P43235|CATK_HUMAN	50.12	4	1	1	Carbamidomethylation	36966	Cathepsin K OS=Homo sapiens GN=CTSK PE=1 SV=1
1339	869	sp|P04156|PRIO_HUMAN	49.05	5	1	1	Carbamidomethylation	27661	Major prion protein OS=Homo sapiens GN=PRNP PE=1 SV=1
400	733	sp|P25705|ATPA_HUMAN	46.56	2	1	1		59751	ATP synthase subunit alpha mitochondrial OS=Homo sapiens GN=ATP5A1 PE=1 SV=1
1340	754	sp|Q96RD7|PANX1_HUMAN	45.75	3	1	1		48050	Pannexin-1 OS=Homo sapiens GN=PANX1 PE=1 SV=4
569	774	sp|Q9BXS4|TMM59_HUMAN	44.93	3	1	1		36223	Transmembrane protein 59 OS=Homo sapiens GN=TMEM59 PE=1 SV=1
1283	833	sp|P62913|RL11_HUMAN	44.55	8	1	1		20252	60S ribosomal protein L11 OS=Homo sapiens GN=RPL11 PE=1 SV=2
1607	744	sp|P39059|COFA1_HUMAN	44.33	1	1	1		141720	Collagen alpha-1(XV) chain OS=Homo sapiens GN=COL15A1 PE=1 SV=2
765	764	sp|P10599|THIO_HUMAN	44.22	12	1	1		11737	Thioredoxin OS=Homo sapiens GN=TXN PE=1 SV=3
2279	743	sp|Q9H444|CHM4B_HUMAN	44.13	6	1	1		24950	Charged multivesicular body protein 4b OS=Homo sapiens GN=CHMP4B PE=1 SV=1
485	838	sp|Q969X1|LFG3_HUMAN	43.87	5	1	1		34607	Protein lifeguard 3 OS=Homo sapiens GN=TMBIM1 PE=1 SV=2
1972	767	sp|Q9NV92|NFIP2_HUMAN	43.43	4	1	1		36390	NEDD4 family-interacting protein 2 OS=Homo sapiens GN=NDFIP2 PE=1 SV=2
2133	808	sp|O15162|PLS1_HUMAN	42.52	4	1	1	Carbamidomethylation	35049	Phospholipid scramblase 1 OS=Homo sapiens GN=PLSCR1 PE=1 SV=1
1037	680	sp|P55058|PLTP_HUMAN	40.48	2	1	1		54739	Phospholipid transfer protein OS=Homo sapiens GN=PLTP PE=1 SV=1
1841	753	sp|Q9Y315|DEOC_HUMAN	40.43	4	1	1	Carbamidomethylation	35231	Deoxyribose-phosphate aldolase OS=Homo sapiens GN=DERA PE=1 SV=2
1151	732	sp|Q6EMK4|VASN_HUMAN	39.49	2	1	1		71713	Vasorin OS=Homo sapiens GN=VASN PE=1 SV=1
1341	873	sp|P62424|RL7A_HUMAN	39.18	5	1	1		29996	60S ribosomal protein L7a OS=Homo sapiens GN=RPL7A PE=1 SV=2
2283	777	sp|Q9HC07|TM165_HUMAN	38.14	3	1	1		34906	Transmembrane protein 165 OS=Homo sapiens GN=TMEM165 PE=1 SV=1
1224	839	sp|Q13286|CLN3_HUMAN	38.05	3	1	1		47623	Battenin OS=Homo sapiens GN=CLN3 PE=1 SV=1
1342	840	sp|Q5VW32|BROX_HUMAN	37.94	3	1	1		46476	BRO1 domain-containing protein BROX OS=Homo sapiens GN=BROX PE=1 SV=1
2281	874	sp|Q02543|RL18A_HUMAN	37.9	7	1	1	Carbamidomethylation	20762	60S ribosomal protein L18a OS=Homo sapiens GN=RPL18A PE=1 SV=2
1976	814	sp|Q8WV92|MITD1_HUMAN	37.66	5	1	1		29314	MIT domain-containing protein 1 OS=Homo sapiens GN=MITD1 PE=1 SV=1
2282	836	sp|P48426|PI42A_HUMAN	37.18	2	1	1		46225	Phosphatidylinositol 5-phosphate 4-kinase type-2 alpha OS=Homo sapiens GN=PIP4K2A PE=1 SV=2
1092	665	sp|Q9NR31|SAR1A_HUMAN	36.95	6	1	1		22367	GTP-binding protein SAR1a OS=Homo sapiens GN=SAR1A PE=1 SV=1
1092	880	sp|Q9Y6B6|SAR1B_HUMAN	36.95	6	1	1		22410	GTP-binding protein SAR1b OS=Homo sapiens GN=SAR1B PE=1 SV=1
1971	718	sp|P04844|RPN2_HUMAN	36.24	2	1	1		69284	Dolichyl-diphosphooligosaccharide--protein glycosyltransferase subunit 2 OS=Homo sapiens GN=RPN2 PE=1 SV=3
1343	842	sp|O15143|ARC1B_HUMAN	36.01	3	1	1		40950	Actin-related protein 2/3 complex subunit 1B OS=Homo sapiens GN=ARPC1B PE=1 SV=3
1223	739	sp|Q86T03|TM55B_HUMAN	35.85	4	1	1	Carbamidomethylation	29470	Type 1 phosphatidylinositol 4 5-bisphosphate 4-phosphatase OS=Homo sapiens GN=TMEM55B PE=1 SV=1
2280	819	sp|Q7Z2H8|S36A1_HUMAN	35.63	3	1	1		53076	Proton-coupled amino acid transporter 1 OS=Homo sapiens GN=SLC36A1 PE=1 SV=1
2132	745	sp|P14868|SYDC_HUMAN	35.55	2	1	1		57136	Aspartate--tRNA ligase cytoplasmic OS=Homo sapiens GN=DARS PE=1 SV=2
1284	879	sp|P48509|CD151_HUMAN	35.32	4	1	1		28295	CD151 antigen OS=Homo sapiens GN=CD151 PE=1 SV=3
1840	728	sp|Q9BZF1|OSBL8_HUMAN	35.21	1	1	1		101196	Oxysterol-binding protein-related protein 8 OS=Homo sapiens GN=OSBPL8 PE=1 SV=3
2284	853	sp|Q9BR76|COR1B_HUMAN	35.02	2	1	1		54235	Coronin-1B OS=Homo sapiens GN=CORO1B PE=1 SV=1
1222	820	sp|P46776|RL27A_HUMAN	34.56	7	1	1		16561	60S ribosomal protein L27a OS=Homo sapiens GN=RPL27A PE=1 SV=2
842	691	sp|P38646|GRP75_HUMAN	33.88	2	1	1		73681	Stress-70 protein mitochondrial OS=Homo sapiens GN=HSPA9 PE=1 SV=2
810	892	sp|P04003|C4BPA_HUMAN	33.86	1	1	1		67033	C4b-binding protein alpha chain OS=Homo sapiens GN=C4BPA PE=1 SV=2
1226	825	sp|Q9BT67|NFIP1_HUMAN	33.8	6	1	1		24899	NEDD4 family-interacting protein 1 OS=Homo sapiens GN=NDFIP1 PE=1 SV=1
422	795	sp|P11169|GTR3_HUMAN	33.66	2	1	1		53924	Solute carrier family 2 facilitated glucose transporter member 3 OS=Homo sapiens GN=SLC2A3 PE=1 SV=1
422	736	sp|Q8TDB8|GTR14_HUMAN	33.66	2	1	1		56320	Solute carrier family 2 facilitated glucose transporter member 14 OS=Homo sapiens GN=SLC2A14 PE=2 SV=1
795	852	sp|Q9H0X4|F234A_HUMAN	33.4	2	1	1		59660	Protein FAM234A OS=Homo sapiens GN=FAM234A PE=1 SV=1
2137	856	sp|Q9UL25|RAB21_HUMAN	31.92	6	1	1		24348	Ras-related protein Rab-21 OS=Homo sapiens GN=RAB21 PE=1 SV=3
2131	831	sp|P62753|RS6_HUMAN	31.84	5	1	1		28681	40S ribosomal protein S6 OS=Homo sapiens GN=RPS6 PE=1 SV=1
2286	845	sp|Q9NQX7|ITM2C_HUMAN	31.72	4	1	1		30224	Integral membrane protein 2C OS=Homo sapiens GN=ITM2C PE=1 SV=1
1973	768	sp|P18124|RL7_HUMAN	31.38	4	1	1		29226	60S ribosomal protein L7 OS=Homo sapiens GN=RPL7 PE=1 SV=1
1344	860	sp|Q12974|TP4A2_HUMAN	31.36	5	1	1		19127	Protein tyrosine phosphatase type IVA 2 OS=Homo sapiens GN=PTP4A2 PE=1 SV=1
1344	900	sp|Q93096|TP4A1_HUMAN	31.36	5	1	1		19815	Protein tyrosine phosphatase type IVA 1 OS=Homo sapiens GN=PTP4A1 PE=1 SV=2
370	854	sp|P07477|TRY1_HUMAN	30.81	4	1	1	Deamidation (NQ)	26558	Trypsin-1 OS=Homo sapiens GN=PRSS1 PE=1 SV=1
2285	781	sp|P10515|ODP2_HUMAN	30.68	2	1	1		68997	Dihydrolipoyllysine-residue acetyltransferase component of pyruvate dehydrogenase complex mitochondrial OS=Homo sapiens GN=DLAT PE=1 SV=3
1286	760	sp|Q9GZM7|TINAL_HUMAN	30.63	2	1	1		52387	Tubulointerstitial nephritis antigen-like OS=Homo sapiens GN=TINAGL1 PE=1 SV=1
1970	702	sp|P49588|SYAC_HUMAN	30.21	2	1	1	Carbamidomethylation	106810	Alanine--tRNA ligase cytoplasmic OS=Homo sapiens GN=AARS PE=1 SV=2
1974	851	sp|P36955|PEDF_HUMAN	30.15	3	1	1		46312	Pigment epithelium-derived factor OS=Homo sapiens GN=SERPINF1 PE=1 SV=4
1289	901	sp|Q9H1C7|CYTM1_HUMAN	29.12	10	1	1		10631	Cysteine-rich and transmembrane domain-containing protein 1 OS=Homo sapiens GN=CYSTM1 PE=1 SV=1
1842	800	sp|P15260|INGR1_HUMAN	28.91	2	1	1		54405	Interferon gamma receptor 1 OS=Homo sapiens GN=IFNGR1 PE=1 SV=1
2134	747	sp|P16403|H12_HUMAN	28.86	6	1	1		21365	Histone H1.2 OS=Homo sapiens GN=HIST1H1C PE=1 SV=2
2134	887	sp|P10412|H14_HUMAN	28.86	5	1	1		21865	Histone H1.4 OS=Homo sapiens GN=HIST1H1E PE=1 SV=2
2134	867	sp|P16402|H13_HUMAN	28.86	5	1	1		22350	Histone H1.3 OS=Homo sapiens GN=HIST1H1D PE=1 SV=2
1287	923	sp|O14498|ISLR_HUMAN	28.65	2	1	1		45997	Immunoglobulin superfamily containing leucine-rich repeat protein OS=Homo sapiens GN=ISLR PE=2 SV=1
2135	782	sp|P31948|STIP1_HUMAN	28.06	2	1	1		62639	Stress-induced-phosphoprotein 1 OS=Homo sapiens GN=STIP1 PE=1 SV=1
1608	757	sp|Q03169|TNAP2_HUMAN	27.46	2	1	1		72661	Tumor necrosis factor alpha-induced protein 2 OS=Homo sapiens GN=TNFAIP2 PE=2 SV=2
2288	788	sp|Q9BXS5|AP1M1_HUMAN	27.42	2	1	1		48587	AP-1 complex subunit mu-1 OS=Homo sapiens GN=AP1M1 PE=1 SV=3
1975	700	sp|P78371|TCPB_HUMAN	27.35	2	1	1		57488	T-complex protein 1 subunit beta OS=Homo sapiens GN=CCT2 PE=1 SV=4
2312	940	sp|P30041|PRDX6_HUMAN	26.68	5	1	1		25035	Peroxiredoxin-6 OS=Homo sapiens GN=PRDX6 PE=1 SV=3
2287	898	sp|P21796|VDAC1_HUMAN	26.53	5	1	1		30773	Voltage-dependent anion-selective channel protein 1 OS=Homo sapiens GN=VDAC1 PE=1 SV=2
1154	805	sp|Q9Y262|EIF3L_HUMAN	26.46	2	1	1		66727	Eukaryotic translation initiation factor 3 subunit L OS=Homo sapiens GN=EIF3L PE=1 SV=1
2313	942	sp|Q96IU4|ABHEB_HUMAN	26.36	5	1	1		22346	Protein ABHD14B OS=Homo sapiens GN=ABHD14B PE=1 SV=1
2138	910	sp|Q01974|ROR2_HUMAN	26.33	1	1	1		104757	Tyrosine-protein kinase transmembrane receptor ROR2 OS=Homo sapiens GN=ROR2 PE=1 SV=2
2136	926	sp|O14684|PTGES_HUMAN	26.06	7	1	1		17102	Prostaglandin E synthase OS=Homo sapiens GN=PTGES PE=1 SV=2
726	693	sp|Q8NBI5|S43A3_HUMAN	25.94	2	1	1		54529	Solute carrier family 43 member 3 OS=Homo sapiens GN=SLC43A3 PE=1 SV=2
1039	796	sp|P39656|OST48_HUMAN	25.74	2	1	1		50801	Dolichyl-diphosphooligosaccharide--protein glycosyltransferase 48 kDa subunit OS=Homo sapiens GN=DDOST PE=1 SV=4
1977	844	sp|P30530|UFO_HUMAN	25.7	1	1	1		98336	Tyrosine-protein kinase receptor UFO OS=Homo sapiens GN=AXL PE=1 SV=3
2289	979	sp|Q5JXB2|UE2NL_HUMAN	25.28	7	1	1		17377	Putative ubiquitin-conjugating enzyme E2 N-like OS=Homo sapiens GN=UBE2NL PE=1 SV=1
2289	978	sp|P61088|UBE2N_HUMAN	25.28	7	1	1		17138	Ubiquitin-conjugating enzyme E2 N OS=Homo sapiens GN=UBE2N PE=1 SV=1
2314	980	sp|Q9NVC3|S38A7_HUMAN	25.1	2	1	1		49966	Putative sodium-coupled neutral amino acid transporter 7 OS=Homo sapiens GN=SLC38A7 PE=1 SV=1
1978	832	sp|Q8NBS9|TXND5_HUMAN	24.47	2	1	1		47629	Thioredoxin domain-containing protein 5 OS=Homo sapiens GN=TXNDC5 PE=1 SV=2
2315	984	sp|P22626|ROA2_HUMAN	24.29	3	1	1		37430	Heterogeneous nuclear ribonucleoproteins A2/B1 OS=Homo sapiens GN=HNRNPA2B1 PE=1 SV=2
2316	944	sp|P35325|SPR2B_HUMAN	24.14	18	1	1	Carbamidomethylation	7975	Small proline-rich protein 2B OS=Homo sapiens GN=SPRR2B PE=2 SV=1
2316	945	sp|P35326|SPR2A_HUMAN	24.14	18	1	1	Carbamidomethylation	7965	Small proline-rich protein 2A OS=Homo sapiens GN=SPRR2A PE=1 SV=1
2316	946	sp|P22532|SPR2D_HUMAN	24.14	18	1	1	Carbamidomethylation	7905	Small proline-rich protein 2D OS=Homo sapiens GN=SPRR2D PE=2 SV=2
2316	947	sp|P22531|SPR2E_HUMAN	24.14	18	1	1	Carbamidomethylation	7855	Small proline-rich protein 2E OS=Homo sapiens GN=SPRR2E PE=2 SV=2
2316	948	sp|Q9BYE4|SPR2G_HUMAN	24.14	18	1	1	Carbamidomethylation	8158	Small proline-rich protein 2G OS=Homo sapiens GN=SPRR2G PE=3 SV=1
2290	991	sp|P01033|TIMP1_HUMAN	23.82	4	1	1		23171	Metalloproteinase inhibitor 1 OS=Homo sapiens GN=TIMP1 PE=1 SV=1
1346	1020	sp|Q96JD6|AKCL2_HUMAN	23.6	2	1	1		36589	1 5-anhydro-D-fructose reductase OS=Homo sapiens GN=AKR1E2 PE=1 SV=2
1346	1003	sp|P14550|AK1A1_HUMAN	23.6	2	1	1		36573	Alcohol dehydrogenase [NADP(+)] OS=Homo sapiens GN=AKR1A1 PE=1 SV=3
1292	996	sp|P62318|SMD3_HUMAN	23.59	8	1	1		13916	Small nuclear ribonucleoprotein Sm D3 OS=Homo sapiens GN=SNRPD3 PE=1 SV=1
1843	841	sp|P84095|RHOG_HUMAN	23.55	10	1	1		21308	Rho-related GTP-binding protein RhoG OS=Homo sapiens GN=RHOG PE=1 SV=1
2291	987	sp|O14907|TX1B3_HUMAN	23.47	14	1	1		13735	Tax1-binding protein 3 OS=Homo sapiens GN=TAX1BP3 PE=1 SV=2
2292	995	sp|P61769|B2MG_HUMAN	23.45	18	1	1	Carbamidomethylation	13715	Beta-2-microglobulin OS=Homo sapiens GN=B2M PE=1 SV=1
2317	1018	sp|P51809|VAMP7_HUMAN	23.28	5	1	1		24935	Vesicle-associated membrane protein 7 OS=Homo sapiens GN=VAMP7 PE=1 SV=3
1347	1021	sp|Q8NG11|TSN14_HUMAN	23.25	4	1	1		30691	Tetraspanin-14 OS=Homo sapiens GN=TSPAN14 PE=1 SV=1
1155	810	sp|P54849|EMP1_HUMAN	23.16	6	1	1		17563	Epithelial membrane protein 1 OS=Homo sapiens GN=EMP1 PE=1 SV=3
2293	1041	sp|Q8NE00|TM104_HUMAN	22.94	2	1	1		55679	Transmembrane protein 104 OS=Homo sapiens GN=TMEM104 PE=1 SV=2
955	950	sp|Q6E0U4|DMKN_HUMAN	22.7	2	1	1		47082	Dermokine OS=Homo sapiens GN=DMKN PE=1 SV=3
1844	855	sp|Q92783|STAM1_HUMAN	22.7	3	1	1		59180	Signal transducing adapter molecule 1 OS=Homo sapiens GN=STAM PE=1 SV=3
1041	829	sp|P05067|A4_HUMAN	22.6	2	1	1		86943	Amyloid beta A4 protein OS=Homo sapiens GN=APP PE=1 SV=3
994	828	sp|O43390|HNRPR_HUMAN	22.57	2	1	1		70943	Heterogeneous nuclear ribonucleoprotein R OS=Homo sapiens GN=HNRNPR PE=1 SV=1
994	862	sp|O60506|HNRPQ_HUMAN	22.57	2	1	1		69603	Heterogeneous nuclear ribonucleoprotein Q OS=Homo sapiens GN=SYNCRIP PE=1 SV=2
1979	792	sp|Q8WV41|SNX33_HUMAN	21.79	2	1	1		65265	Sorting nexin-33 OS=Homo sapiens GN=SNX33 PE=1 SV=1
2294	863	sp|P02675|FIBB_HUMAN	21.68	2	1	1		55928	Fibrinogen beta chain OS=Homo sapiens GN=FGB PE=1 SV=2
2318	1091	sp|P14174|MIF_HUMAN	21.61	8	1	1	Carbamidomethylation	12476	Macrophage migration inhibitory factor OS=Homo sapiens GN=MIF PE=1 SV=4
2295	1050	sp|P35080|PROF2_HUMAN	21.38	10	1	1		15046	Profilin-2 OS=Homo sapiens GN=PFN2 PE=1 SV=3
2319	1088	sp|O43657|TSN6_HUMAN	20.79	5	1	1		27563	Tetraspanin-6 OS=Homo sapiens GN=TSPAN6 PE=1 SV=1
2296	1129	sp|Q658P3|STEA3_HUMAN	20.3	3	1	1		54601	Metalloreductase STEAP3 OS=Homo sapiens GN=STEAP3 PE=1 SV=2
560	1255	sp|Q96HU8|DIRA2_HUMAN	20.29	6	1	1		22485	GTP-binding protein Di-Ras2 OS=Homo sapiens GN=DIRAS2 PE=1 SV=1
2140	1065	sp|Q9BQJ4|TMM47_HUMAN	20.24	4	1	1		19998	Transmembrane protein 47 OS=Homo sapiens GN=TMEM47 PE=1 SV=1
1609	1026	sp|P42356|PI4KA_HUMAN	20.2	1	1	1		236828	Phosphatidylinositol 4-kinase alpha OS=Homo sapiens GN=PI4KA PE=1 SV=4
2297	1140	sp|Q8N4L2|TM55A_HUMAN	20.03	4	1	1	Carbamidomethylation; Deamidation (NQ)	28081	Type 2 phosphatidylinositol 4 5-bisphosphate 4-phosphatase OS=Homo sapiens GN=TMEM55A PE=1 SV=1
1789	2283	sp|O14802|RPC1_HUMAN	23.2	0	1	0		155641	DNA-directed RNA polymerase III subunit RPC1 OS=Homo sapiens GN=POLR3A PE=1 SV=2
1854	1574	sp|Q8N960|CE120_HUMAN	23.2	1	1	0		112640	Centrosomal protein of 120 kDa OS=Homo sapiens GN=CEP120 PE=1 SV=2
1998	1754	sp|O95259|KCNH1_HUMAN	22.98	1	1	0		111423	Potassium voltage-gated channel subfamily H member 1 OS=Homo sapiens GN=KCNH1 PE=1 SV=1
1948	6263	sp|Q13009|TIAM1_HUMAN	22.88	0	1	0		177507	T-lymphoma invasion and metastasis-inducing protein 1 OS=Homo sapiens GN=TIAM1 PE=1 SV=2
1747	941	sp|P61160|ARP2_HUMAN	22.35	1	1	0		44761	Actin-related protein 2 OS=Homo sapiens GN=ACTR2 PE=1 SV=1
1980	886	sp|Q13368|MPP3_HUMAN	22.29	1	1	0		66152	MAGUK p55 subfamily member 3 OS=Homo sapiens GN=MPP3 PE=1 SV=2
1659	1238	sp|Q9HCK1|ZDBF2_HUMAN	21.45	0	1	0		265615	DBF4-type zinc finger-containing protein 2 OS=Homo sapiens GN=ZDBF2 PE=1 SV=3
1982	1139	sp|Q96I25|SPF45_HUMAN	21.16	1	1	0		44962	Splicing factor 45 OS=Homo sapiens GN=RBM17 PE=1 SV=1
1691	4580	sp|Q7Z589|EMSY_HUMAN	21.14	0	1	0		141467	BRCA2-interacting transcriptional repressor EMSY OS=Homo sapiens GN=EMSY PE=1 SV=2
1482	1388	sp|Q9H3U1|UN45A_HUMAN	20.94	1	1	0	Deamidation (NQ)	103077	Protein unc-45 homolog A OS=Homo sapiens GN=UNC45A PE=1 SV=1
1563	1262	sp|Q93074|MED12_HUMAN	20.78	0	1	0		243079	Mediator of RNA polymerase II transcription subunit 12 OS=Homo sapiens GN=MED12 PE=1 SV=4
1849	1234	sp|P46721|SO1A2_HUMAN	20.77	1	1	0		74145	Solute carrier organic anion transporter family member 1A2 OS=Homo sapiens GN=SLCO1A2 PE=2 SV=1
1430	8243	sp|Q8IVL1|NAV2_HUMAN	20.69	0	1	0	Deamidation (NQ)	268165	Neuron navigator 2 OS=Homo sapiens GN=NAV2 PE=1 SV=3
1559	10449	sp|Q92545|TM131_HUMAN	20.69	0	1	0	Deamidation (NQ)	205137	Transmembrane protein 131 OS=Homo sapiens GN=TMEM131 PE=1 SV=3
1620	2340	sp|A6NM62|LRC53_HUMAN	20.59	0	1	0		140741	Leucine-rich repeat-containing protein 53 OS=Homo sapiens GN=LRRC53 PE=4 SV=2
1677	2124	sp|Q16531|DDB1_HUMAN	20.59	0	1	0		126968	DNA damage-binding protein 1 OS=Homo sapiens GN=DDB1 PE=1 SV=1
1906	3016	sp|Q07092|COGA1_HUMAN	20.59	0	1	0		157751	Collagen alpha-1(XVI) chain OS=Homo sapiens GN=COL16A1 PE=1 SV=2
1983	1110	sp|Q9NZH0|GPC5B_HUMAN	20.54	1	1	0		44795	G-protein coupled receptor family C group 5 member B OS=Homo sapiens GN=GPRC5B PE=2 SV=2
1993	1333	sp|O60610|DIAP1_HUMAN	20.54	0	1	0		141347	Protein diaphanous homolog 1 OS=Homo sapiens GN=DIAPH1 PE=1 SV=2
1777	3094	sp|O94812|BAIP3_HUMAN	20.42	0	1	0		131901	BAI1-associated protein 3 OS=Homo sapiens GN=BAIAP3 PE=1 SV=2
1902	1547	sp|Q569K6|CC157_HUMAN	20.42	1	1	0		83941	Coiled-coil domain-containing protein 157 OS=Homo sapiens GN=CCDC157 PE=2 SV=3
2026	2770	sp|P51841|GUC2F_HUMAN	20.42	0	1	0		124850	Retinal guanylyl cyclase 2 OS=Homo sapiens GN=GUCY2F PE=2 SV=2
2144	1362	sp|Q6NYC8|PPR18_HUMAN	20.42	1	1	0		67943	Phostensin OS=Homo sapiens GN=PPP1R18 PE=1 SV=1
2147	1545	sp|Q9UKZ1|CNO11_HUMAN	20.42	1	1	0		55215	CCR4-NOT transcription complex subunit 11 OS=Homo sapiens GN=CNOT11 PE=1 SV=1
1744	9812	sp|Q8IWT3|CUL9_HUMAN	20.37	0	1	0		281227	Cullin-9 OS=Homo sapiens GN=CUL9 PE=1 SV=2
1528	6844	sp|Q9UMN6|KMT2B_HUMAN	20.31	0	1	0	Deamidation (NQ)	293513	Histone-lysine N-methyltransferase 2B OS=Homo sapiens GN=KMT2B PE=1 SV=1
1815	5145	sp|Q5SRE5|NU188_HUMAN	20.31	0	1	0	Deamidation (NQ)	196041	Nucleoporin NUP188 homolog OS=Homo sapiens GN=NUP188 PE=1 SV=1
1664	1163	sp|Q9ULI4|KI26A_HUMAN	20.29	0	1	0	Deamidation (NQ)	194588	Kinesin-like protein KIF26A OS=Homo sapiens GN=KIF26A PE=1 SV=3
1722	4661	sp|Q9Y4F4|TGRM1_HUMAN	20.16	0	1	0	Phosphorylation (STY)	189359	TOG array regulator of axonemal microtubules protein 1 OS=Homo sapiens GN=TOGARAM1 PE=1 SV=4
1986	8958	sp|Q9H3Y6|SRMS_HUMAN	20.16	1	1	0	Phosphorylation (STY)	54507	Tyrosine-protein kinase Srms OS=Homo sapiens GN=SRMS PE=1 SV=1
1832	9628	sp|Q6T4R5|NHS_HUMAN	20.09	0	1	0	Deamidation (NQ)	179134	Nance-Horan syndrome protein OS=Homo sapiens GN=NHS PE=1 SV=2
1988	1208	sp|Q8NBI3|DRAXI_HUMAN	20.01	1	1	0	Deamidation (NQ)	38650	Draxin OS=Homo sapiens GN=DRAXIN PE=1 SV=2

## Sheet: 表头说明
表头名	释义
Protein Group	蛋白质分组号，分组号相同的蛋白共享肽段及定量信息
Protein ID	蛋白质ID号
Accession	蛋白质ACCESSION号
-10lgP	蛋白打分，分值越高，可信度越高
Coverage (%)	检测到的肽段在蛋白中的覆盖度
#Peptides	匹配到该蛋白的肽段序列数量
#Unique	匹配到该蛋白的Unique肽段序列数量
PTM	肽段的修饰类型
Avg. Mass	匹配到蛋白的平均分子量
Description	蛋白质描述信息
