# Supplementary material for: Exosomes from Adipose Stem Cells Promote Diabetic Wound Healing through the eHSP90/LRP1/AKT Axis
Source: Cells. 2022 Oct 14;11(20):3229. doi: 10.3390/cells11203229 (PMC9600018; doi:10.3390/cells11203229)
Supplement: Supplementary file 1 [file cells-11-03229-s001.zip › Supplementary table S3 GO.xlsx]

## Sheet: GO_BP
Category	Term	Count	PValue	Gene Symbol	Fold Enrichment
GOTERM_BP_DIRECT	GO:0007165~signal transduction	83	0.0671983	GNA13, NAMPT, MPZL1, HRAS, NRP1, SLC44A2, GABRB3, PDIA3, GNA11, CRABP2, GJA1, DDR2, IQGAP1, LNPEP, DTHD1, PTGES, ANK3, ARHGAP1, RALB, RALA, STAM, DLG5, CAP1, NCKIPSD, IFNGR1, BRD8, EGFR, RAP2B, YARS, MAGI2, HSP90AA1, RAN, RALBP1, MPP3, PRKAB2, PI4KA, CLIC1, ARHGAP23, FLNB, JUP, ARHGAP31, NPC1, GNB2, KRT17, GNB1, IGF2R, TXN, PDGFRB, ROR2, TXNRD1, GNB4, SH3GL2, SH3GL1, YWHAZ, GNAI2, C3, ERBB3, SNX1…	1.19093
GOTERM_BP_DIRECT	GO:0007155~cell adhesion	82	5.91941e-19	TLN2, VTN, POSTN, EDIL3, CD151, DDR2, VCL, CTNNB1, CD47, APP, SRPX, CD44, FAP, TGFBI, COL12A1, LOXL2, PTPRF, FLOT2, MFGE8, CTNNA1, PCDHGB4, THY1, JUP, ARVCF, CD36, LAMC3, VCAN, LAMC2, LAMC1, COL1A1, ADAM12, DST, TNC, PTK7, ITGA11, ITGB5, ARF6, PCDHGC4, ITGB3, ALCAM, ISLR, CD9, LGALS3BP, LAMB2, COL7A1, SORBS2, ITGAV, FAT1, COL6A3, RAC1, COL6A2, COL6A1, GPNMB, LAMB1, THBS2, APC, FN1, COL18A1, COL4A…	2.97607
GOTERM_BP_DIRECT	GO:0098609~cell-cell adhesion	63	1.55772e-20	RTN4, HSP90AB1, LDHA, CHMP4B, CAPZA1, PRDX1, IQGAP1, PKM, PICALM, ARHGAP1, FAM129B, AHNAK, VASN, BSG, RAN, PFKP, PI4KA, SLC3A2, EEF2, FLNB, EVPL, PRDX6, RARS, EEF1G, SDCBP, RUVBL1, RAB10, SH3GL1, ALDOA, SNX9, YWHAZ, HCFC1, HSPA1A, TAGLN2, CAPZB, RACK1, PFN1, MACF1, ATIC, PLIN3, RAB11B, FASN, IDH1, RPL7A, HSPA5, EHD1, HSPA8, ENO1, EHD4, PLEC, UNC45A, MYO1B, CKAP5, FSCN1, YWHAB, S100A11, YWHAE, ANX…	3.87269
GOTERM_BP_DIRECT	GO:0030198~extracellular matrix organization	62	6.9081e-28	GFAP, PXDN, PRDX4, VTN, POSTN, DDR2, CD47, APP, CD44, POMT1, TGFBI, RECK, BSG, LAMC3, COL1A2, VCAN, LAMC2, LAMC1, COL1A1, TNC, ITGA11, ITGB5, COL2A1, DCN, ITGB3, ITGB1, ABI3BP, LAMB2, COL7A1, FGB, COL27A1, ITGAV, COL6A3, COL6A2, COL6A1, LAMB1, FN1, COL4A4, COL18A1, COL4A3, COL4A2, FBN1, NF1, CCDC80, HSPG2, ITGA2, NID1, NID2, ITGA4, COL5A3, COL16A1, COL5A2, EMILIN1, KDR, LAMA2, LAMA4, FBLN1, LAMA3…	5.2696
GOTERM_BP_DIRECT	GO:0007264~small GTPase mediated signal transduction	48	1.07078e-12	RAB7A, HRAS, RAB3C, RAB5B, RAB5C, RAB1B, ARF6, ITSN1, RRAGC, RAB44, DIRAS2, RAC1, ARHGAP1, RAB23, RAB11B, RHOA, RRAS, RAB11A, RAB21, RHOG, RAB2A, GDI2, RAB8A, RAP2C, RAB8B, RAN, RALBP1, RAB4A, RAB4B, DOCK8, DOCK5, ARHGAP31, NRAS, ARF1, ARF3, RAB35, RAB22A, ARF4, REM1, RAB5A, RAB14, YWHAQ, RAP1A, RAP1B, ARL8A, ARL8B, RAB13, RAB10	3.25048
GOTERM_BP_DIRECT	GO:0043547~positive regulation of GTPase activity	48	0.0145721	SNX9, A2M, HRAS, ERBB3, RAB3GAP1, AKAP9, KIT, ITSN1, ITGB1, IQGAP1, RACK1, PLEKHG1, RAC1, ARHGAP1, IQSEC1, ARHGEF4, EGFR, OBSCN, GDI2, LAMTOR1, RALBP1, PTPRA, NF1, SPTBN4, SIPA1L2, ARHGEF17, DOCK8, ARHGAP29, ARHGEF15, HERC1, DOCK5, ARHGAP23, FARP1, THY1, RGS22, DIS3, ARHGAP31, GNAQ, SBF1, ARFGEF3, FYN, ARF4, PDGFRA, JAK1, PDGFRB, RAP1A, GNAS, SPTA1	1.41525
GOTERM_BP_DIRECT	GO:0015031~protein transport	46	2.62339e-05	FRAS1, RAB7A, AP1M1, RAB3C, RAB5B, RAB5C, TSG101, RAB1B, ARF6, CCT6B, NUP210, RAB23, VPS4B, CEP290, RAB11A, VPS4A, DOPEY2, VPS13B, RAB21, RAB2A, SCAMP3, GDI2, ACTN4, RAB4A, RAB4B, STXBP1, STXBP2, CD63, MYH9, CADPS, HSP90B1, CADPS2, ARF1, IST1, ARF3, RAB35, RAB22A, ARF4, RAB5A, RAB14, RAP1A, TOM1, COL1A1, PDCD6IP, VAMP2, MVP	1.94
GOTERM_BP_DIRECT	GO:0043066~negative regulation of apoptotic process	44	0.00213885	YWHAZ, TP63, PRDX2, TIMP1, TMF1, SETX, MIF, PHIP, CD44, SQSTM1, ALB, DNAJA1, LTF, HSPA5, FAM129B, DDAH2, RPS27A, HSPA9, EGFR, CLN3, ACTC1, MPZ, DDB1, ANXA1, BIRC6, RPS6, ANXA5, ANXA4, FLNA, KDR, SOD2, HSP90B1, CD59, TXNDC5, CFL1, ARF4, UBC, PDGFRB, HSPD1, UBB, PRNP, APBB2, UBA52, GSTP1	1.61095
GOTERM_BP_DIRECT	GO:0016032~viral process	41	1.58067e-06	TLN1, AP1M1, VIM, SYNCRIP, NUP188, PSMA7, SCRIB, PSMB5, RACK1, PSMB1, COPB1, NUP210, RHOA, RALA, H2AFX, HSPA8, CDK13, KAT2A, RAN, DDB1, HLA-A, UBR4, YWHAB, HLA-C, MFGE8, HLA-B, SPEN, YWHAE, KDR, VDAC1, EIF4G3, FBLN1, KRT19, FYN, PSMA4, PSMC2, PSMA3, EIF4A1, PDGFRA, HSPD1, RBM15	2.28431
GOTERM_BP_DIRECT	GO:0030335~positive regulation of cell migration	36	9.53146e-10	HRAS, DIAPH1, KIT, LRRC15, RACK1, TIAM1, ITGAV, ILK, HSPA5, PDGFD, GPNMB, LAMB1, APC, COL18A1, EGFR, STX4, FLT1, ADAM10, MYO1C, ACTN4, MMP14, MYADM, KDR, CDH13, SEMA6B, SYNE2, ITGA5, PTP4A1, CEMIP, PDGFRA, ROR2, SDCBP, PDGFRB, LAMC2, CPNE3, COL1A1	3.25932
GOTERM_BP_DIRECT	GO:0008283~cell proliferation	36	0.00438283	HRAS, GNAI2, APC2, TCF7L2, PRDX1, SCRIB, MIF, GPC4, ANXA7, PICALM, EVI5, RAC1, TGFBI, ILK, KAT2A, EGFR, COL4A3, PRG4, DLGAP5, FSCN1, CD276, ITGA2, UHRF1, IGSF8, LRP1, SERPINF1, KRT16, LAMA5, GNB1, ASCC3, CD81, TXN, CNOT11, TXNRD1, RAP1B, EMP1	1.63856
GOTERM_BP_DIRECT	GO:0050821~protein stabilization	32	7.81689e-11	HSP90AB1, ATP1B3, HIP1R, CLU, PML, HCFC1, HSPA1A, CCT2, HSPA1B, CCT3, CALR, PLPP3, PFN1, PFN2, APOA1, GAPDH, TCP1, HSP90AA1, FLOT2, STXBP1, CCT6A, FLNA, CCT7, LAMP1, LAMP2, CCT5, CCT4, PPIB, GNAQ, CCT8, HSPD1, WIZ	3.9197
GOTERM_BP_DIRECT	GO:0007010~cytoskeleton organization	32	6.36841e-09	KRT6B, TUBB2A, DIAPH1, CAPZB, PHIP, MACF1, KRT5, APOE, TUBB6, MSN, KRT4, NCKIPSD, TUBA1A, TUBB3, TUBB4A, TUBA1C, KRT84, TUBB4B, ACTB, MICAL3, KRT13, DPYSL2, THY1, BRWD1, MAST1, MAST2, KRT16, LAMA5, KRT15, CFL1, TUBA4A, DST	3.31105
GOTERM_BP_DIRECT	GO:0016477~cell migration	32	3.22674e-08	APC2, PTK7, ITGB3, ARPC5, CD151, ITGB1, SCRIB, SDC3, TIAM1, SORBS2, FAT1, GPC6, ITGAV, RHOA, APC, FLT1, PTPRF, FSCN1, CD63, EPHA3, JUP, CORO1B, LAMA5, FYN, ARF4, JAK1, PDGFRB, LAMC1, ABL1, ENG, SRMS, LCP1	3.0993
GOTERM_BP_DIRECT	GO:0043065~positive regulation of apoptotic process	31	0.00422342	LDHA, HIP1R, CLU, LPAR1, ITSN1, ITGB1, SCRIB, CTNNB1, RACK1, TIAM1, SQSTM1, RAC1, DNAJA1, ANO6, RPS27A, APC, ARHGEF4, OBSCN, AIFM1, NF1, ARHGEF17, RPS6, NCSTN, IGF2R, UBC, PDGFRB, HSPD1, UBB, APBB2, ABL1, UBA52	1.7214
GOTERM_BP_DIRECT	GO:0006457~protein folding	30	1.03406e-06	HSP90AB1, GNAI3, PDIA3, GNAI2, PDIA6, CCT2, CCT3, CALR, CANX, CCT6B, DNAJA1, HSPA8, HSPA9, TCP1, HSP90AA1, AARS, SACS, CCT6A, ST13, CCT7, CCT5, HSP90B1, CCT4, GNB2, PPIA, GNB1, TXNDC5, CCT8, TXN, GNB4	2.77646
GOTERM_BP_DIRECT	GO:0000165~MAPK cascade	30	0.00108063	HRAS, CAV1, ERBB3, AKAP9, KIT, PSMA7, SETX, PSMB5, PSMB1, PSMD1, PSMD2, RPS27A, EGFR, NF1, SPTBN4, PTPRA, YWHAB, NRAS, PSMA6, FYN, PSMA4, PSMC2, PSMA3, PDGFRA, UBC, PDGFRB, JAK1, SPTA1, UBB, UBA52	1.90749
GOTERM_BP_DIRECT	GO:0006810~transport	30	0.0453238	AP1M1, GNAI3, ATP1B3, GABRB3, CRABP2, GJA1, ABCA2, AKAP9, MITD1, SYPL2, ATP2B1, SYPL1, ALB, GRID2, LAPTM4A, ATP4A, ABCB11, RALBP1, SLC12A4, HERC1, ABCG2, P2RX4, AFP, ATP6V1A, VAMP7, CACNA1H, ABCC1, DHX40, ABCC2, PARP4	1.4361
GOTERM_BP_DIRECT	GO:0002576~platelet degranulation	29	7.16726e-12	ALDOA, TLN1, A2M, CLU, ITGB3, TTN, VCL, TIMP1, ISLR, CD9, APP, LGALS3BP, APOA1, ALB, FGB, APOH, ITIH3, FN1, ACTN4, PSAP, STXBP1, ACTN1, CD63, FLNA, LAMP2, CD36, F5, TUBA4A, WDR1	4.69032
GOTERM_BP_DIRECT	GO:0042493~response to drug	29	0.0161078	LDHA, ABCA2, ABCA1, CALR, B2M, CTNNB1, APOA1, BCHE, RPN2, COL18A1, SLC8A1, ACTC1, HSP90AA1, LGALS1, ANXA1, ITGA2, ATP1A1, DPYSL2, CPT1A, SOD2, ABCG2, NPC1, FYN, ABCC1, GNAS, COL1A1, HSPD1, PARP4, ABL1	1.58916
GOTERM_BP_DIRECT	GO:0051301~cell division	29	0.0744251	TRIOBP, GNAI3, GNAI2, TSG101, KNTC1, ARF6, TTC28, CLTC, TUBB, EVI5, VPS4A, CLASP1, PARD3B, TUBA1A, TUBA1B, TUBA1C, CDK13, RAN, CKAP5, BIRC6, SMC2, SMC3, SEPT11, TIMELESS, IST1, ANXA11, ARL8A, ARL8B, RUVBL1	1.38029
GOTERM_BP_DIRECT	GO:0007596~blood coagulation	28	1.44098e-05	CAPZA1, ITGB3, CAPZB, SERPINE2, FGB, RAC1, SERPINC1, PDGFD, EHD1, EHD2, HBB, ANO6, ITGA2, DOCK8, ANXA5, P2RX4, CD36, F5, GNAQ, FYN, CD59, F2, RAB5A, COL1A2, HBG1, COL1A1, HBG2, HBE1	2.53502
GOTERM_BP_DIRECT	GO:0006898~receptor-mediated endocytosis	28	1.75924e-05	SNX9, HIP1R, SNX17, VTN, CLTC, CALR, APOB, LGALS3BP, APOA1, PICALM, ALB, APOE, APOBR, PIKFYVE, CAP1, LOXL2, HBB, EGFR, CLN3, HSP90AA1, PRG4, HBA1, TINAGL1, HSP90B1, CD36, LRP1, LRP10, IGF2R	2.50777
GOTERM_BP_DIRECT	GO:0034220~ion transmembrane transport	27	0.000357185	ATP1B3, GABRB3, GJA1, ATP6V1B2, ATP12A, ANXA6, ATP2B1, TTYH3, ATP2B4, GRID2, ATP8B2, ATP6V0D1, ANO6, RPS27A, GRID1, TCIRG1, ATP4A, ATP1A1, ATP1A2, ATP6V1A, P2RX4, ATP13A1, ATP2A2, UBC, RYR1, UBB, UBA52	2.14184
GOTERM_BP_DIRECT	GO:0001525~angiogenesis	27	0.000893349	CAV1, NRP1, ANPEP, RNF213, MMP2, WARS, FAP, ITGAV, TGFBI, PLXND1, FN1, COL18A1, COL4A2, FLT1, HSPG2, COL15A1, MFGE8, MYH9, MMP14, KDR, ANXA2, THY1, GPI, ITGA5, LAMA5, TNFAIP2, PDCD6	2.01698
GOTERM_BP_DIRECT	GO:0060071~Wnt signaling pathway, planar cell polarity pathway	26	9.6248e-11	CLTC, PSMA7, GPC4, PSMB5, PFN1, AP2B1, PSMB1, TIAM1, GPC6, PSMD1, RAC1, PSMD2, RHOA, RPS27A, MED12, CELSR3, CELSR2, PSMA6, AP2A1, PSMC2, PSMA4, PSMA3, UBC, ROR2, UBB, UBA52	4.7079
GOTERM_BP_DIRECT	GO:0030036~actin cytoskeleton organization	26	1.88367e-07	DIAPH1, ARPC5, CAPZB, PFN1, PFN2, RAC1, RHOA, CAP1, RHOG, IQSEC1, TNXB, RAN, SPECC1, FSCN1, NF1, ARHGEF17, CORO6, FLNB, CORO1C, CORO1B, XIRP1, XIRP2, CFL1, SDCBP, AMOT, ABL1	3.33175
GOTERM_BP_DIRECT	GO:0050900~leukocyte migration	25	2.11971e-07	HRAS, BSG, CAV1, ATP1B3, SLC3A2, ITGA4, ITGB3, MYH9, ITGB1, MIF, CD47, NRAS, APOB, SLC16A1, CD44, PPIA, ITGA5, FYN, ITGAV, F2, COL1A2, COL1A1, MSN, YES1, FN1	3.41367
GOTERM_BP_DIRECT	GO:0016192~vesicle-mediated transport	25	1.22752e-05	AP1M1, AP1B1, ARF6, CLTC, AP2B1, PICALM, COPB1, ACTR1A, PLIN3, VPS4A, RAB11A, TBC1D4, SAR1B, GOLGA4, SAR1A, SEC23A, STX4, GDI2, SPTBN4, VAMP7, RAB14, CPNE1, CPNE3, VAMP2, RAB10	2.73992
GOTERM_BP_DIRECT	GO:0006886~intracellular protein transport	25	0.00800349	SEC23A, COPA, SNX9, AP1M1, STX4, AP1B1, RAN, SNX17, CTSA, CLTC, TBC1D15, AP2B1, YWHAH, EVI5, AP2A1, COPB1, TBC1D4, TOM1, STAM, SNX33, SAR1B, EHD1, PDCD6, SAR1A, KPNB1	1.7647
GOTERM_BP_DIRECT	GO:0010628~positive regulation of gene expression	25	0.0259511	HRAS, CAV1, ERBB3, LRRC32, TNC, RAB3GAP1, VIM, HCFC1, GJA1, HSPA1A, HSPA1B, KIT, CALR, APOB, EZR, GSN, ANK3, MSN, FN1, ACTC1, ACTA1, RNF207, PLSCR1, FBLN1, ENG	1.58957
GOTERM_BP_DIRECT	GO:0008360~regulation of cell shape	23	3.01333e-05	GNA13, ALDOA, DIAPH1, PLXNB2, FERMT2, ANXA1, LPAR1, KIT, MYH9, KDR, PHIP, EPB41L3, ANXA7, BRWD1, EZR, FYN, F2, CYFIP1, WDR1, SPTA1, MSN, MYH14, FN1	2.73679
GOTERM_BP_DIRECT	GO:0022617~extracellular matrix disassembly	22	2.17541e-09	A2M, BSG, ADAM10, FLOT1, FBN1, PRSS1, HSPG2, NID1, DCN, MMP14, MMP2, TIMP1, CTSK, LAMA3, CD44, HTRA1, GSN, LAMC2, LAMC1, ENG, LCP1, FN1	4.82226
GOTERM_BP_DIRECT	GO:0048013~ephrin receptor signaling pathway	22	2.42254e-08	ACTB, HRAS, ADAM10, ARPC4, ARPC5, ITSN1, MMP2, EPHA3, NCSTN, ACTG1, ACTR3, ARPC1B, ACTR2, AP2B1, ARPC2, AP2A1, FYN, TIAM1, RAC1, RHOA, SDCBP, YES1	4.26154
GOTERM_BP_DIRECT	GO:0000086~G2/M transition of mitotic cell cycle	22	6.58509e-05	RAB8A, HSP90AA1, CKAP5, CEP135, AKAP9, CEP152, YWHAE, OFD1, YWHAG, TUBB, ACTR1A, UBC, TUBA4A, CEP290, CLASP1, UBB, DYNC1H1, TUBA1A, UBA52, TUBB4A, RPS27A, TUBB4B	2.67512
GOTERM_BP_DIRECT	GO:0030574~collagen catabolic process	21	4.71713e-10	COL4A4, COL18A1, COL4A3, COL4A2, PEPD, COL15A1, COL2A1, COL5A3, MMP14, COL5A2, MMP2, CTSK, COL19A1, COL7A1, COL6A3, COL1A2, COL6A2, COL12A1, CTSD, COL6A1, COL1A1	5.46615
GOTERM_BP_DIRECT	GO:0016197~endosomal transport	21	8.71535e-10	SNX9, CHMP4B, TSG101, SNX17, ABCA1, TINAGL1, PICALM, SQSTM1, RAB35, UBC, VPS4B, VPS4A, TOM1, STAM, RAB13, UBB, SNX33, RAB10, VPS28, UBA52, RPS27A	5.30051
GOTERM_BP_DIRECT	GO:0006928~movement of cell or subcellular component	21	1.24535e-07	ACTB, GNA13, TLN1, CAPZA1, VIM, ARF6, ARPC5, CAPZB, VCL, ACTG1, ACTR3, CD9, ARPC1B, ACTR2, IGSF8, TUBB, ARPC2, RAC1, TXN, MSN, TUBB4B	4.06783
GOTERM_BP_DIRECT	GO:0030168~platelet activation	21	1.51073e-05	GNA13, RAP2B, YWHAZ, GNA11, AXL, ACTN1, ITGB3, FLNA, CD9, PLSCR1, F5, GNAQ, FGB, GNB1, FYN, RAC1, F2, RHOA, COL1A2, COL1A1, RHOG	3.04203
GOTERM_BP_DIRECT	GO:0090263~positive regulation of canonical Wnt signaling pathway	21	2.87608e-05	TRPM4, CAV1, GPRC5B, PSMA7, JUP, PSMB5, PSMA6, PSMB1, PSMA4, PSMC2, PSMA3, PSMD1, ILK, PSMD2, UBC, ROR2, COL1A1, UBB, UBA52, ASPM, RPS27A	2.91528
GOTERM_BP_DIRECT	GO:0006897~endocytosis	21	0.000234999	RAB7A, SNX9, HRAS, RALBP1, EEA1, DPYSL2, NPC1, APP, PICALM, ATP9B, NME1, AP2A1, VAMP7, RAB22A, RAB5A, TOM1, USP20, SNX33, EHD1, EHD2, SH3GL1	2.51679
GOTERM_BP_DIRECT	GO:0008544~epidermis development	20	4.95679e-07	FLOT2, CRABP2, SPRR2G, SPRR2E, KRT9, EVPL, LAMA3, ATP2A2, KRT5, KRT17, COL7A1, SPRR2D, KRT16, SPRR2A, KRT15, SPRR2B, KRT14, KRT2, LAMC2, EMP1	3.9197
GOTERM_BP_DIRECT	GO:0007160~cell-matrix adhesion	20	1.25771e-06	FERMT2, ITGA11, ITGB5, ITGA2, NID1, VTN, ITGA4, NID2, ITGB3, COL5A3, CD63, ITGB1, VCL, CTNNB1, CD44, FGB, TIAM1, ITGAV, ILK, RAC1	3.70194
GOTERM_BP_DIRECT	GO:0043488~regulation of mRNA stability	20	1.02538e-05	YWHAZ, YWHAB, HSPA1A, HSPA1B, PSMA7, PSMB5, DIS3, PSMA6, PSMB1, PSMA4, PSMC2, PSMA3, PSMD1, PSMD2, UBC, UBB, PUM2, UBA52, HSPA8, RPS27A	3.2347
GOTERM_BP_DIRECT	GO:0006334~nucleosome assembly	20	8.25566e-05	HIST1H2BB, HIST1H1E, HIST1H2BC, HIST1H2BD, HIST1H1D, HIST1H1C, HIST1H2BH, NAP1L1, HIST1H2BO, HIST1H2BM, HIST1H2BN, H2BFS, HIST1H2BK, HIST1H4A, HIST1H2BL, HIST2H2BE, HIST2H2BF, HIST1H2BJ, H2AFX, HIST3H2BB	2.79979
GOTERM_BP_DIRECT	GO:0010951~negative regulation of endopeptidase activity	20	0.000103877	COL4A3, A2M, PZP, C3, C5, CD109, BIRC6, VTN, SERPINH1, TIMP1, APP, LPA, SERPINE2, COL7A1, SERPINF1, COL6A3, SERPINC1, CSTB, ITIH2, ITIH3	2.75351
GOTERM_BP_DIRECT	GO:0006888~ER to Golgi vesicle-mediated transport	20	0.00339055	RAB2A, SEC23A, COPA, SPTBN4, RAB1B, F5, COL7A1, VCP, ANK3, CD59, COPB1, VAMP7, RAB35, F2, ARF4, DYNC2H1, SPTA1, SAR1B, DYNC1H1, GOLGB1	2.08234
GOTERM_BP_DIRECT	GO:0043123~positive regulation of I-kappaB kinase/NF-kappaB signaling	20	0.00363434	SLC44A2, LGALS1, NDFIP1, TSPAN6, NDFIP2, GJA1, LPAR1, GPRC5B, FLNA, CTNNB1, UBE2N, CD36, FYN, RHOA, UBC, LTF, UBB, ABL1, UBA52, RPS27A	2.06941
GOTERM_BP_DIRECT	GO:0090090~negative regulation of canonical Wnt signaling pathway	20	0.00416571	CAV1, APC2, DRAXIN, PSMA7, TCF7L2, PSMB5, PSMA6, PSMB1, APOE, PSMA4, PSMC2, PSMA3, PSMD1, PSMD2, UBC, ROR2, UBB, UBA52, RPS27A, APC	2.04402
GOTERM_BP_DIRECT	GO:0019886~antigen processing and presentation of exogenous peptide antigen via MHC class II	19	7.43331e-06	SEC23A, RAB7A, KIF4B, KIF22, AP1M1, AP1B1, CLTC, CANX, AP2B1, ARF1, AP2A1, ACTR1A, ACTR1B, DYNC2H1, CTSD, DYNC1H1, SAR1B, KIF26A, SH3GL2	3.44039
GOTERM_BP_DIRECT	GO:0007229~integrin-mediated signaling pathway	19	2.13848e-05	ADAM10, FERMT2, ITGA11, ITGB5, ITGA2, ITGA4, ITGB3, MYH9, COL16A1, ITGB1, CD47, FBLN1, APOA1, ITGA5, LAMA5, ITGAV, ILK, ADAM12, DST	3.19713
GOTERM_BP_DIRECT	GO:0010629~negative regulation of gene expression	19	0.00139608	HRAS, FLOT2, NDFIP1, NDFIP2, GJA1, MYADM, TMF1, MIF, SLIT3, RACK1, ANXA7, DIP2A, ACE, PICALM, SERPINF1, NME1, FYN, CPNE1, ENG	2.31033
GOTERM_BP_DIRECT	GO:0007156~homophilic cell adhesion via plasma membrane adhesion molecules	19	0.0065912	PCDH11X, PLXNB2, PCDHGA9, SDK1, PCDHGC5, CELSR3, CELSR2, PCDHGC4, ITGB1, DCHS1, PCDHGB4, CDH13, CDH15, FAT3, FAT1, FAT2, NPTN, IGSF9, CDH11	2.00327
GOTERM_BP_DIRECT	GO:0007411~axon guidance	19	0.00702916	HRAS, NRP1, DRAXIN, PTPRA, SPTBN4, DPYSL2, SLIT3, LAMA2, NRAS, LAMB2, EZR, FYN, ANK3, RAC1, SPTA1, APBB2, KIF26A, TUBB3, KIF26B	1.99067
GOTERM_BP_DIRECT	GO:0001666~response to hypoxia	19	0.0151697	CAV1, LDHA, AHCY, ACTN4, NF1, PML, ITGA2, POSTN, MMP14, MMP2, SOD3, SOD2, PKM, HSP90B1, RYR1, HSPD1, LOXL2, ENG, DPP4	1.84021
GOTERM_BP_DIRECT	GO:0043161~proteasome-mediated ubiquitin-dependent protein catabolic process	19	0.0626216	DDB1, PML, PSMA7, CTNNB1, PLAA, PSMB5, PSMA6, PSMB1, VCP, PSMA4, PSMC2, PSMA3, PSMD1, UBC, PSMD2, UBB, UBA52, RPS27A, APC	1.55919
GOTERM_BP_DIRECT	GO:0006364~rRNA processing	19	0.0925178	RPL27A, HEATR1, RPS4X, RPS6, RIOK2, RPS8, RPS25, DIS3, CHD7, RPS16, RPL7, RPL18A, DDX21, RPL5, RPL11, RPL7A, MDN1, UBA52, RPS27A	1.47905
GOTERM_BP_DIRECT	GO:0002479~antigen processing and presentation of exogenous peptide antigen via MHC class I, TAP-dependent	18	1.07887e-07	HLA-H, HLA-A, ITGB5, HLA-C, HLA-B, PSMA7, HLA-G, B2M, PSMB5, CD36, PSMB1, PSMA6, ITGAV, PSMA4, PSMC2, PSMA3, PSMD1, PSMD2	4.75964
GOTERM_BP_DIRECT	GO:0030334~regulation of cell migration	18	1.30733e-06	GNA13, RTN4, PLXNB2, LMNA, DPYSL3, ITGB3, FLNA, VCL, THY1, LAMA2, LAMA4, LAMA3, SERPINE2, LAMA5, RAC1, RHOA, AMOT, PLXND1	4.05212
GOTERM_BP_DIRECT	GO:0044267~cellular protein metabolic process	18	0.000661996	CKAP4, HSPG2, MFGE8, ITM2B, MMP2, B2M, APP, APOA1, HIST1H4A, GSN, PAPPA, TGFBI, F2, UBC, LTF, UBB, UBA52, RPS27A	2.54116
GOTERM_BP_DIRECT	GO:0043524~negative regulation of neuron apoptotic process	18	0.00232285	HSP90AB1, CLN3, HRAS, NRP1, GABRB3, ERBB3, DRAXIN, AARS, STXBP1, AXL, ITSN1, SOD2, GPI, LRP1, APOE, FYN, ILK, HSPD1	2.27165
GOTERM_BP_DIRECT	GO:0070374~positive regulation of ERK1 and ERK2 cascade	18	0.0339255	EGFR, ABCA7, HRAS, NRP1, KDR, MIF, GLIPR2, CD36, CD44, FGB, NPTN, PDGFRA, RAP1A, PDGFRB, RAP1B, PDGFD, GPNMB, ABL1	1.71347
GOTERM_BP_DIRECT	GO:0070527~platelet aggregation	17	6.18331e-10	ACTB, RAP2B, TLN1, STXBP1, ACTN1, STXBP3, CLIC1, ITGB3, MYH9, FLNA, VCL, ACTG1, FGB, ILK, PDGFRA, GNAS, HBB	6.90728
GOTERM_BP_DIRECT	GO:0046718~viral entry into host cell	17	1.76931e-05	AXL, ITGB5, ITGA2, HSPA1A, ANPEP, HSPA1B, ITGB3, ITGB1, LAMP1, SLC1A5, NPC1, TFRC, ITGA5, ITGAV, CD81, SCARB2, DPP4	3.53998
GOTERM_BP_DIRECT	GO:0007018~microtubule-based movement	17	2.08378e-05	DNAH10, KIF4B, KIF22, DNAH14, DNHD1, DNAH2, DNAH5, KIF1A, AP2B1, KIF7, AP2A1, DYNC2H1, KIF21A, KIF26A, DYNC1H1, SH3GL2, KIF26B	3.49628
GOTERM_BP_DIRECT	GO:0002223~stimulatory C-type lectin receptor signaling pathway	17	0.000503192	HRAS, PSMA7, PSMB5, UBE2N, NRAS, PSMA6, PSMB1, FYN, PSMA4, PSMC2, PSMA3, PSMD1, UBC, PSMD2, UBB, UBA52, RPS27A	2.69713
GOTERM_BP_DIRECT	GO:0038096~Fc-gamma receptor signaling pathway involved in phagocytosis	17	0.00384103	ACTB, HSP90AB1, HSP90AA1, MYO1C, ARPC4, ARPC5, ACTG1, ACTR3, ARPC1B, ACTR2, ARPC2, FYN, RAC1, CYFIP1, NCKIPSD, ABL1, YES1	2.22991
GOTERM_BP_DIRECT	GO:0001934~positive regulation of protein phosphorylation	17	0.00384103	EGFR, HRAS, C3, FLOT1, ITGB3, KDR, ANXA2, RACK1, SQSTM1, F2, RAC1, NPTN, RALB, ABL1, GPNMB, FAM129A, ENG	2.22991
GOTERM_BP_DIRECT	GO:0051056~regulation of small GTPase mediated signal transduction	17	0.00648136	ARHGEF4, OBSCN, GDI2, A2M, RALBP1, SIPA1L2, ARHGEF17, ARHGAP29, ITSN1, ARHGAP23, ARHGAP31, TIAM1, ARHGAP1, RAC1, RHOA, AMOT, RHOG	2.11342
GOTERM_BP_DIRECT	GO:0060271~cilium morphogenesis	17	0.00745832	RAB8A, RAB8B, TTC21B, STK36, DNAH5, FBF1, FLNA, CFAP54, ACTR3, OFD1, GSN, RAB23, DYNC2H1, CEP290, EHD1, ATP6V0D1, TTC21A	2.08234
GOTERM_BP_DIRECT	GO:0001501~skeletal system development	17	0.00798926	AEBP1, GNA11, FBN1, TP63, COL2A1, POSTN, ACP2, PRDX1, COL5A2, CHD7, COL19A1, GNAQ, COL1A2, COL12A1, VCAN, COL1A1, CDH11	2.06714
GOTERM_BP_DIRECT	GO:0050852~T cell receptor signaling pathway	17	0.0160545	HRAS, PSMA7, THY1, PSMB5, UBE2N, PSMA6, PSMB1, FYN, PSMA4, PSMC2, PSMA3, PSMD1, UBC, PSMD2, UBB, UBA52, RPS27A	1.9135
GOTERM_BP_DIRECT	GO:0051260~protein homooligomerization	17	0.066254	CAV1, CCDC88C, CHMP4B, FLOT1, DPYSL3, RNF213, CPT1A, SOD2, ST13, ANXA6, STOM, P2RX4, VCP, PRNP, EHD1, POLQ, EHD4	1.59999
GOTERM_BP_DIRECT	GO:0038095~Fc-epsilon receptor signaling pathway	17	0.0689506	HRAS, PSMA7, PSMB5, UBE2N, NRAS, PSMA6, PSMB1, PSMA4, PSMC2, PSMA3, PSMD1, RAC1, UBC, PSMD2, UBB, UBA52, RPS27A	1.591
GOTERM_BP_DIRECT	GO:0042127~regulation of cell proliferation	17	0.0898799	KCNH1, ERBB3, TNC, ANXA1, S100A11, BIRC6, KIT, JUP, TFRC, TIMELESS, FYN, LAMA5, JAK1, ABL1, YES1, ENG, SRMS	1.5308
GOTERM_BP_DIRECT	GO:0016055~Wnt signaling pathway	17	0.0965294	APC2, CCDC88C, DDB1, DRAXIN, FERMT2, CELSR2, TAX1BP3, TCF7L2, CTNNB1, AMER3, MACF1, UBC, UBB, DST, UBA52, RPS27A, APC	1.51443
GOTERM_BP_DIRECT	GO:0006914~autophagy	16	0.0135603	CHMP4B, TSG101, RAB1B, LAMP1, ANXA7, NPC1, SRPX, VCP, TMEM59, SQSTM1, VPS4B, VPS4A, CTSD, STAM, ABL1, VPS28	2.00406
GOTERM_BP_DIRECT	GO:0006413~translational initiation	16	0.0174037	RPL27A, RPS6, RPS4X, RPS8, RPS25, EIF4G3, RPS16, RPL7, RPL18A, EIF4A1, EIF3L, RPL5, RPL11, RPL7A, UBA52, RPS27A	1.94555
GOTERM_BP_DIRECT	GO:0018108~peptidyl-tyrosine phosphorylation	16	0.0414687	EGFR, HSP90AA1, FLT1, ERBB3, AXL, KIT, TTN, DDR2, KDR, EPHA3, FYN, NPTN, PDGFRA, ROR2, PDGFRB, ABL1	1.74209
GOTERM_BP_DIRECT	GO:0061024~membrane organization	15	1.21328e-09	CLN3, RAB8A, YWHAZ, YWHAB, YWHAE, LNPEP, YWHAG, YWHAH, YWHAQ, RAB14, TBC1D4, SGCD, RALA, RAB13, RAB10	7.80878
GOTERM_BP_DIRECT	GO:0042060~wound healing	15	0.00026128	EGFR, ERBB3, TNC, NF1, PTK7, DCN, ITGB3, SCRIB, TIMP1, CORO1B, MACF1, PDGFRA, PDGFRB, ENG, FN1	3.12351
GOTERM_BP_DIRECT	GO:0001649~osteoblast differentiation	15	0.00363503	TNC, NF1, ITGA11, SYNCRIP, GJA1, CLTC, UFL1, PSMC2, FASN, COL6A1, DDX21, VCAN, COL1A1, TMEM119, GPNMB	2.4027
GOTERM_BP_DIRECT	GO:0006936~muscle contraction	15	0.00471162	MYL6, SLC8A1, TLN1, MYH1, ACTA1, GJA1, ITGB5, MYH6, TTN, CACNA1S, VCL, RYR1, CACNA1H, MYH13, MYOF	2.33534
GOTERM_BP_DIRECT	GO:0019083~viral transcription	15	0.00706678	RPL27A, NUP188, RPS6, RPS4X, RPS8, RPS25, RPS16, RPL7, RPL18A, NUP210, RPL5, RPL11, RPL7A, UBA52, RPS27A	2.23108
GOTERM_BP_DIRECT	GO:0070588~calcium ion transmembrane transport	15	0.0118413	TRPM4, SLC8A1, TRPM5, PANX1, CACNA1S, ATP2B1, ATP2B4, ATP2A2, ITGAV, CACNA1G, CACNA1H, CACNA1C, CACNA1D, ANO6, PKDREJ	2.09984
GOTERM_BP_DIRECT	GO:0042384~cilium assembly	15	0.0165667	RAB8A, STK36, CELSR3, DNAH5, FBF1, FLNA, CFAP54, ACTR2, CFAP53, LAMA5, RAB23, DYNC2H1, CEP290, EHD1, ATP6V0D1	2.01517
GOTERM_BP_DIRECT	GO:0006629~lipid metabolic process	15	0.0890879	CLU, ACLY, ABCA2, PLPP1, PLPP3, PLCL1, SLC16A1, G6PD, CD36, LPA, LRP10, CPNE1, CPNE3, ATP5A1, PLTP	1.5916
GOTERM_BP_DIRECT	GO:0035987~endodermal cell differentiation	14	1.09685e-09	COL4A2, LAMA3, COL7A1, ITGA5, ITGAV, ITGB5, COL6A1, COL12A1, VTN, ITGA4, MMP14, LAMB1, MMP2, FN1	8.63786
GOTERM_BP_DIRECT	GO:0000184~nuclear-transcribed mRNA catabolic process, nonsense-mediated decay	14	0.0260824	SMG6, RPL27A, RPS6, RPS4X, RPS8, RPS25, RPL7, RPL18A, RPS16, RPL5, RPL11, RPL7A, UBA52, RPS27A	1.95985
GOTERM_BP_DIRECT	GO:0007605~sensory perception of sound	14	0.0560554	COL4A3, MYO1A, CHD7, GABRB3, NAV2, DIAPH1, MYO15A, SPTBN4, CEMIP, COL2A1, WDR1, COL1A1, MYH14, CACNA1D	1.75355
GOTERM_BP_DIRECT	GO:0006342~chromatin silencing	13	9.21563e-06	HIST1H2AB, HIST2H2AA3, HIST1H2AC, HIST2H2AB, HIST1H2AA, HIST1H2AG, HIST2H2AC, HIST1H2AD, HIST1H2AH, H2AFX, HIST3H2A, H2AFJ, HIST1H2AJ	4.81252
GOTERM_BP_DIRECT	GO:0021762~substantia nigra development	13	2.36672e-05	ACTB, LDHA, G6PD, H2BFS, YWHAH, RHOA, YWHAQ, GNB4, CNP, HSPA5, BASP1, SYPL2, YWHAE	4.41966
GOTERM_BP_DIRECT	GO:0032092~positive regulation of protein binding	13	0.000229774	HSP90AB1, CAV1, RAN, HIP1R, FLOT1, VTN, TCF7L2, B2M, ACE, TIAM1, RALB, SPTA1, PLXND1	3.55022
GOTERM_BP_DIRECT	GO:0038061~NIK/NF-kappaB signaling	13	0.000492666	PSMA7, PSMB5, PSMB1, PSMA6, PSMA4, PSMC2, PSMD1, PSMA3, PSMD2, UBC, UBB, UBA52, RPS27A	3.28127
GOTERM_BP_DIRECT	GO:0051436~negative regulation of ubiquitin-protein ligase activity involved in mitotic cell cycle	13	0.000972794	PSMA7, PSMB5, PSMB1, PSMA6, PSMA4, PSMC2, PSMD1, PSMA3, PSMD2, UBC, UBB, UBA52, RPS27A	3.05019
GOTERM_BP_DIRECT	GO:0048010~vascular endothelial growth factor receptor signaling pathway	13	0.00110488	ACTB, FLT1, NRP1, HSP90AA1, AXL, ITGB3, KDR, ACTG1, FYN, ITGAV, RAC1, RHOA, CYFIP1	3.00783
GOTERM_BP_DIRECT	GO:0051437~positive regulation of ubiquitin-protein ligase activity involved in regulation of mitotic cell cycle transition	13	0.00179092	PSMA7, PSMB5, PSMB1, PSMA6, PSMA4, PSMC2, PSMD1, PSMA3, PSMD2, UBC, UBB, UBA52, RPS27A	2.84952
GOTERM_BP_DIRECT	GO:0031145~anaphase-promoting complex-dependent catabolic process	13	0.00250795	PSMA7, PSMB5, PSMB1, PSMA6, PSMA4, PSMC2, PSMD1, PSMA3, PSMD2, UBC, UBB, UBA52, RPS27A	2.74131
GOTERM_BP_DIRECT	GO:0010976~positive regulation of neuron projection development	13	0.00673196	MAGI2, SERPINF1, FYN, NME1, PLXNB2, NPTN, PTK7, RAP1A, DPYSL3, NCKIPSD, GPRC5B, EPHA3, SETX	2.4333
GOTERM_BP_DIRECT	GO:0006614~SRP-dependent cotranslational protein targeting to membrane	13	0.0103182	RPL27A, RPS6, RPS4X, RPS8, RPS25, RPL7, RPL18A, RPS16, RPL11, RPL5, RPL7A, UBA52, RPS27A	2.30387
GOTERM_BP_DIRECT	GO:0007169~transmembrane receptor protein tyrosine kinase signaling pathway	13	0.0121087	EGFR, MPZL1, FLT1, FYN, ERBB3, NPTN, JAK1, ROR2, ANGPTL1, KIT, YES1, SRMS, KDR	2.25587
GOTERM_BP_DIRECT	GO:0033209~tumor necrosis factor-mediated signaling pathway	13	0.0505976	PSMA7, PSMB5, PSMB1, PSMA6, PSMA4, PSMC2, PSMD1, PSMA3, PSMD2, UBC, UBB, UBA52, RPS27A	1.83528
GOTERM_BP_DIRECT	GO:0002474~antigen processing and presentation of peptide antigen via MHC class I	12	6.48893e-07	SEC23A, HLA-H, ACE, PDIA3, HLA-A, HLA-C, HLA-B, CALR, SAR1B, CANX, HLA-G, B2M	6.66349
GOTERM_BP_DIRECT	GO:1901998~toxin transport	12	5.11627e-06	CCT7, CCT5, TCP1, NRP1, CCT4, CCT6B, CCT8, DNAJA1, CCT2, ANTXR2, HSPA5, CCT3	5.55291
GOTERM_BP_DIRECT	GO:0034446~substrate adhesion-dependent cell spreading	12	9.17288e-06	LAMA5, ITGAV, FERMT2, ILK, RAC1, AXL, ITGA4, LAMC1, ITGB3, ABL1, LAMB1, FN1	5.26065
GOTERM_BP_DIRECT	GO:0030199~collagen fibril organization	12	1.20887e-05	TNXB, NF1, COL1A2, COL12A1, COL2A1, COL1A1, COL5A3, LOXL2, DDR2, SERPINH1, COL5A2, ANXA2	5.12576
GOTERM_BP_DIRECT	GO:0072659~protein localization to plasma membrane	12	0.00118664	EPB41L3, RAB8A, ATP1B3, ANK3, RAC1, STXBP1, RAB11A, RAB10, EHD2, DCHS1, FLNA, ABCA12	3.17309
GOTERM_BP_DIRECT	GO:0051291~protein heterooligomerization	12	0.00199068	JUP, HRAS, MAGI2, SQSTM1, ILK, YWHAB, STXBP3, HBA1, HBE1, CTNNA1, HBB, SEPT11	2.98365
GOTERM_BP_DIRECT	GO:0030855~epithelial cell differentiation	12	0.00284671	ANXA7, CBR1, LGALS3, TAGLN, KRT14, KRT3, KRT4, TAGLN2, PGK1, ANXA4, CPT1A, VDAC1	2.85578
GOTERM_BP_DIRECT	GO:0034976~response to endoplasmic reticulum stress	12	0.00491117	UFL1, P4HB, HSP90B1, SRPX, PDIA3, ATP2A2, TXNDC5, FLOT1, PDIA6, EEF2, ABL1, FAM129A	2.6654
GOTERM_BP_DIRECT	GO:0006869~lipid transport	12	0.00543921	APOA1, LPA, LRP10, OSBPL8, APOE, PSAP, APOBR, SPNS1, ANO6, PLTP, ABCA5, ABCA12	2.63033
GOTERM_BP_DIRECT	GO:0045454~cell redox homeostasis	12	0.00601103	P4HB, PDIA3, PRDX6, AIFM1, TXNDC5, TXN, PRDX4, LTF, PDIA6, PRDX2, TXNRD1, PRDX1	2.59617
GOTERM_BP_DIRECT	GO:0050731~positive regulation of peptidyl-tyrosine phosphorylation	12	0.00961251	NRP1, CD36, CD44, ITGA5, CD81, VTN, ITGB3, ABL1, YES1, PLPP3, EHD4, MIF	2.43786
GOTERM_BP_DIRECT	GO:0007179~transforming growth factor beta receptor signaling pathway	12	0.0215473	APOA1, FERMT2, PML, RHOA, COL1A2, UBC, ITGB5, UBB, ENG, ITGB1, UBA52, RPS27A	2.17288
GOTERM_BP_DIRECT	GO:0030336~negative regulation of cell migration	12	0.0266567	RECK, RAP2B, RAP2C, MAGI2, OSBPL8, KRT16, NF1, RRAS, DPYSL3, ENG, THY1, VCL	2.10426
GOTERM_BP_DIRECT	GO:0006979~response to oxidative stress	12	0.0655829	PSMB5, EGFR, APP, PXDN, APOE, KRT1, IDH1, PRDX2, ABCC2, MMP14, ABL1, PRNP	1.81732
GOTERM_BP_DIRECT	GO:0007219~Notch signaling pathway	12	0.0841051	NCSTN, NOTCH3, APP, KRT19, ADAM10, UBC, TP63, SPEN, UBB, ANXA4, UBA52, RPS27A	1.7383
GOTERM_BP_DIRECT	GO:0006461~protein complex assembly	12	0.0881608	PICALM, DARS, TSPAN4, CAPZA1, PML, KNTC1, MPP6, DLG5, VAMP2, LAMC1, MDN1, APC	1.72332
GOTERM_BP_DIRECT	GO:0019058~viral life cycle	11	8.0139e-06	TSG101, PPIA, CHMP4B, VPS4B, UBC, VPS4A, UBB, PDCD6IP, VPS28, UBA52, RPS27A	5.91116
GOTERM_BP_DIRECT	GO:0030100~regulation of endocytosis	11	8.0139e-06	CDH13, PICALM, RAB5B, RAB5C, HIP1R, RAB4A, SNX17, RAB4B, RAB5A, ABL1, EHD4	5.91116
GOTERM_BP_DIRECT	GO:0007017~microtubule-based process	11	3.49021e-05	TUBB, TUBB2A, TUBA4A, TUBB6, TUBA1A, TUBA1B, TUBB3, TUBA1C, TUBB4A, EML4, TUBB4B	5.09017
GOTERM_BP_DIRECT	GO:0051603~proteolysis involved in cellular protein catabolic process	11	0.000466165	PSMB5, CTSK, PSMA6, PSMB1, PSMA4, FAP, PSMA3, CTSA, HSPA5, PSMA7, TINAGL1	3.81763
GOTERM_BP_DIRECT	GO:0048146~positive regulation of fibroblast proliferation	11	0.001231	EGFR, FBLN1, PDGFRA, PML, PDGFRB, PDGFD, ABL1, DDR2, ANXA2, FN1, MIF	3.39345
GOTERM_BP_DIRECT	GO:0019882~antigen processing and presentation	11	0.00142514	HLA-H, RAB8B, RAB3C, RAB5B, RAB35, RAB4A, HLA-A, HLA-C, HLA-B, RAB10, HLA-G	3.33175
GOTERM_BP_DIRECT	GO:0030512~negative regulation of transforming growth factor beta receptor signaling pathway	11	0.00453805	VASN, CAV1, HTRA1, CD109, UBC, HSPA1A, HSPA5, UBB, ENG, UBA52, RPS27A	2.86322
GOTERM_BP_DIRECT	GO:0043627~response to estrogen	11	0.005082	ARPC1B, LDHA, CAV1, KRT19, HSP90AA1, APOA1, PDGFRB, HSPD1, ABCC2, MMP14, CTNNA1	2.81917
GOTERM_BP_DIRECT	GO:0098869~cellular oxidant detoxification	11	0.00860887	PXDN, APOE, PRDX6, ALB, TXN, PRDX4, TXNRD1, HBA1, GSTO1, HBB, GSTP1	2.6178
GOTERM_BP_DIRECT	GO:0060333~interferon-gamma-mediated signaling pathway	11	0.00949716	CIITA, HLA-H, CD44, PML, HLA-A, JAK1, HLA-C, HLA-B, HLA-G, IFNGR1, B2M	2.58093
GOTERM_BP_DIRECT	GO:0016236~macroautophagy	11	0.0150265	TCIRG1, CLN3, LAMTOR1, SQSTM1, PRKAB2, UBC, UBB, UBA52, RPS27A, VDAC1, RRAGC	2.41113
GOTERM_BP_DIRECT	GO:0030216~keratinocyte differentiation	11	0.0150265	EVPL, TSG101, SPRR2D, KRT16, SPRR2A, SPRR2B, ANXA1, TP63, SPRR2G, KRT10, SPRR2E	2.41113
GOTERM_BP_DIRECT	GO:0007517~muscle organ development	11	0.0401512	LAMA2, AEBP1, NEB, TAGLN, LAMA5, COL6A3, ITGA11, LMNA, SGCD, CACNA1H, UNC45A	2.05894
GOTERM_BP_DIRECT	GO:0006874~cellular calcium ion homeostasis	11	0.0516756	ATP2B1, ANXA7, CAV1, ATP13A1, ATP2B4, ATP2A2, APOE, SLC30A1, TMEM165, CALR, SYPL2	1.97039
GOTERM_BP_DIRECT	GO:0046854~phosphatidylinositol phosphorylation	11	0.0548673	EGFR, FYN, ERBB3, PI4K2A, PIKFYVE, PDGFRA, EFR3A, PI4KA, PDGFRB, KIT, PIP4K2A	1.94943
GOTERM_BP_DIRECT	GO:0031175~neuron projection development	11	0.0767255	GPRIN1, APP, RAB35, PHGDH, RAB11A, RAB13, CDK16, HERC1, EHD1, LAMB1, CAPZB	1.83246
GOTERM_BP_DIRECT	GO:0061621~canonical glycolysis	10	1.19457e-05	ALDOA, GAPDHS, PKM, GPI, TPI1, ENO2, PFKP, PGK1, GAPDH, ENO1	6.4072
GOTERM_BP_DIRECT	GO:0006096~glycolytic process	10	0.000129828	ALDOA, GAPDHS, GPI, LDHA, TPI1, PGM1, ENO2, PGK1, GAPDH, ENO1	4.89963
GOTERM_BP_DIRECT	GO:0042059~negative regulation of epidermal growth factor receptor signaling pathway	10	0.0002091	EGFR, AP2B1, TSG101, AP2A1, UBC, STAM, UBB, UBA52, RPS27A, SH3GL2	4.62743
GOTERM_BP_DIRECT	GO:0038128~ERBB2 signaling pathway	10	0.00032494	EGFR, NRAS, HRAS, HSP90AA1, ERBB3, UBC, CPNE3, UBB, UBA52, RPS27A	4.38388
GOTERM_BP_DIRECT	GO:0000302~response to reactive oxygen species	10	0.000400203	P4HB, APOE, PRDX6, TXN, PRDX2, TXNRD1, PRDX1, GSTP1, SOD3, SOD2	4.27147
GOTERM_BP_DIRECT	GO:0006986~response to unfolded protein	10	0.000716226	HSPA1L, HSP90AB1, HSP90AA1, HSPA2, HSPA6, DNAJA1, HSPA4, HSPD1, SERPINH1, HSPA8	3.96636
GOTERM_BP_DIRECT	GO:0019731~antibacterial humoral response	10	0.00102246	APP, HIST1H2BC, H2BFS, HIST1H2BD, HIST1H2BK, HIST2H2BE, HIST1H2BJ, HLA-A, LTF, B2M	3.78608
GOTERM_BP_DIRECT	GO:0032956~regulation of actin cytoskeleton organization	10	0.00167259	TRIOBP, EZR, LRP1, HIP1R, FSCN1, ILK, RHOA, PDGFRB, ABL1, EPHA3	3.54441
GOTERM_BP_DIRECT	GO:0071230~cellular response to amino acid stimulus	10	0.00167259	EGFR, LAMTOR1, COL1A2, COL6A1, PDGFD, COL1A1, COL16A1, MMP2, COL5A2, RRAGC	3.54441
GOTERM_BP_DIRECT	GO:0031424~keratinization	10	0.00195099	EVPL, KRT17, SPRR2D, KRT16, SPRR2A, SPRR2B, KRT2, SPRR2G, SPRR2E, ABCA12	3.47057
GOTERM_BP_DIRECT	GO:0075733~intracellular transport of virus	10	0.00301355	TSG101, RAN, NUP210, UBC, NUP188, UBB, VPS28, KPNB1, UBA52, RPS27A	3.26642
GOTERM_BP_DIRECT	GO:0043406~positive regulation of MAP kinase activity	10	0.0081229	EGFR, HRAS, DIRAS2, FLT1, ILK, PDGFRB, PDGFD, KIT, IQGAP1, MIF	2.82351
GOTERM_BP_DIRECT	GO:0045669~positive regulation of osteoblast differentiation	10	0.00906175	ILK, CD276, LTF, TP63, GJA1, GNAS, CLIC1, TMEM119, DDR2, CTNNB1	2.77646
GOTERM_BP_DIRECT	GO:0042632~cholesterol homeostasis	10	0.0136554	CAV1, NPC1, APOB, APOA1, LAMTOR1, APOE, PLSCR3, ABCA2, ABCA1, EHD1	2.60293
GOTERM_BP_DIRECT	GO:0014068~positive regulation of phosphatidylinositol 3-kinase signaling	10	0.0150332	FLT1, FYN, ERBB3, F2, PDGFRA, PDGFRB, PDGFD, DCN, KIT, KDR	2.56288
GOTERM_BP_DIRECT	GO:0043086~negative regulation of catalytic activity	10	0.0348955	CLN3, RNH1, CAND1, TMBIM1, ANXA5, HNRNPR, ANXA4, ANXA2, TIMP1, ANXA2P2	2.22116
GOTERM_BP_DIRECT	GO:0050830~defense response to Gram-positive bacterium	10	0.0679495	APP, HIST1H2BC, CD36, H2BFS, HIST1H2BD, HIST1H2BK, HIST2H2BE, HIST1H2BJ, HLA-A, B2M	1.95985
GOTERM_BP_DIRECT	GO:0042026~protein refolding	9	7.17239e-07	HSPA1L, HSP90AA1, HSPA2, HSPA6, HSPA1A, HSPA1B, HSPD1, HSPA8, B2M	9.99524
GOTERM_BP_DIRECT	GO:1904874~positive regulation of telomerase RNA localization to Cajal body	9	7.17239e-07	CCT7, CCT5, TCP1, CCT4, CCT8, CCT2, CCT3, RUVBL1, CCT6A	9.99524
GOTERM_BP_DIRECT	GO:0033627~cell adhesion mediated by integrin	9	7.17239e-07	ITGA5, ITGAV, FBN1, ITGA11, ITGA2, VTN, ITGB3, COL16A1, ITGB1	9.99524
GOTERM_BP_DIRECT	GO:0050690~regulation of defense response to virus by virus	9	0.000172002	AP2B1, AP1M1, AP1B1, ARF1, AP2A1, FYN, RAC1, HLA-A, B2M	5.35459
GOTERM_BP_DIRECT	GO:0051017~actin filament bundle assembly	9	0.000291007	CORO1B, EZR, ACTN4, MYO1B, FSCN1, ACTN1, DPYSL3, PLS3, LCP1	4.99762
GOTERM_BP_DIRECT	GO:0036258~multivesicular body assembly	9	0.000371802	TSG101, CHMP4B, IST1, VPS4B, VPS4A, RAB11A, STAM, PDCD6IP, VPS28	4.83641
GOTERM_BP_DIRECT	GO:0032212~positive regulation of telomere maintenance via telomerase	9	0.000469942	CCT7, CCT5, TCP1, CCT4, CCT8, CCT2, CCT3, CCT6A, CTNNB1	4.68527
GOTERM_BP_DIRECT	GO:1900026~positive regulation of substrate adhesion-dependent cell spreading	9	0.000469942	TRIOBP, APOA1, FGB, ARPC2, RAC1, CALR, DOCK5, MYADM, FLNA	4.68527
GOTERM_BP_DIRECT	GO:0015991~ATP hydrolysis coupled proton transport	9	0.000469942	TCIRG1, ATP6V1A, ATP4A, ATP1A1, ATP5A1, ATP6V1B2, ATP1A2, ATP6V0D1, ATP12A	4.68527
GOTERM_BP_DIRECT	GO:0086091~regulation of heart rate by cardiac conduction	9	0.000896042	TRPM4, JUP, CACNA2D1, CAV1, CACNA1G, AKAP9, CACNA1C, CACNA1D, YWHAE	4.28367
GOTERM_BP_DIRECT	GO:0010811~positive regulation of cell-substrate adhesion	9	0.00158716	FBLN2, ITGA5, RAC1, CCDC80, NID1, VTN, EDIL3, ABI3BP, EMILIN1	3.94549
GOTERM_BP_DIRECT	GO:0001895~retina homeostasis	9	0.00224453	ACTB, ACTG1, POTEI, ALB, KRT1, LTF, POTEF, PRDX1, B2M	3.74821
GOTERM_BP_DIRECT	GO:0090002~establishment of protein localization to plasma membrane	9	0.00309842	JUP, EZR, LAMA5, FLOT2, SPTBN4, FLOT1, EFR3A, TSPAN14, RAB13	3.56973
GOTERM_BP_DIRECT	GO:0031623~receptor internalization	9	0.00361045	CD9, CAV1, EZR, PICALM, CD36, TFRC, CD81, CLTC, ITGB1	3.48671
GOTERM_BP_DIRECT	GO:0045429~positive regulation of nitric oxide biosynthetic process	9	0.00361045	HSP90AB1, EGFR, P2RX4, HSP90AA1, CLU, PTX3, DDAH2, HBB, SOD2	3.48671
GOTERM_BP_DIRECT	GO:0006094~gluconeogenesis	9	0.00418556	ALDOA, GAPDHS, GPI, TPI1, PGM1, ENO2, PGK1, GAPDH, ENO1	3.40747
GOTERM_BP_DIRECT	GO:0071560~cellular response to transforming growth factor beta stimulus	9	0.00818295	COL4A2, CAV1, FYN, FBN1, POSTN, PDGFD, COL1A1, ABL1, YES1	3.05977
GOTERM_BP_DIRECT	GO:0007266~Rho protein signal transduction	9	0.00924289	GNA13, CDH13, CFL1, ARHGAP1, RHOA, COL1A2, ARHGAP29, TAX1BP3, RHOG	2.99857
GOTERM_BP_DIRECT	GO:0018149~peptide cross-linking	9	0.00924289	ABCA7, EVPL, SPRR2D, SPRR2A, SPRR2B, ANXA1, SPRR2G, SPRR2E, FN1	2.99857
GOTERM_BP_DIRECT	GO:0042542~response to hydrogen peroxide	9	0.0104018	LDHA, SLC8A1, PDGFRB, EEF2, COL1A1, HSPD1, HBA1, HBB, SOD2	2.93978
GOTERM_BP_DIRECT	GO:0006521~regulation of cellular amino acid metabolic process	9	0.0104018	PSMB5, PSMA6, PSMB1, PSMC2, PSMA4, PSMA3, PSMD1, PSMD2, PSMA7	2.93978
GOTERM_BP_DIRECT	GO:0016049~cell growth	9	0.017862	ACTA1, LAMTOR1, ITGAV, SLC3A2, ITGB3, DDX5, EMP3, EMP1, RRAGC	2.6773
GOTERM_BP_DIRECT	GO:1903779~regulation of cardiac conduction	9	0.017862	ATP2B1, SLC8A1, ABCC9, ATP2B4, ATP1B3, ATP2A2, RYR1, ATP1A1, ATP1A2	2.6773
GOTERM_BP_DIRECT	GO:0001523~retinoid metabolic process	9	0.0285449	GPC4, APOB, APOA1, LRP1, APOE, GPC6, ADH5, HSPG2, SDC3	2.45785
GOTERM_BP_DIRECT	GO:0016525~negative regulation of angiogenesis	9	0.031117	COL4A3, COL4A2, SERPINF1, NF1, PML, APOH, AMOT, DCN, THBS2	2.4182
GOTERM_BP_DIRECT	GO:0008217~regulation of blood pressure	9	0.0397722	LNPEP, P2RX4, ACE, COL1A2, ATP1A1, MYH6, ATP1A2, HBB, SOD2	2.30659
GOTERM_BP_DIRECT	GO:0071300~cellular response to retinoic acid	9	0.0574993	SERPINF1, TNC, PTK7, KRT13, COL1A1, ABCA1, YES1, EPHA3, SETX	2.14184
GOTERM_BP_DIRECT	GO:0071260~cellular response to mechanical stimulus	9	0.0615597	EGFR, SLC38A2, RAC1, GJA1, ITGA2, ATP1A1, COL1A1, ATP1A2, ENG	2.11167
GOTERM_BP_DIRECT	GO:0000226~microtubule cytoskeleton organization	9	0.0615597	CUL9, SPECC1, CNP, CLASP1, DST, TUBA1B, GAPDH, MAP7D3, EML4	2.11167
GOTERM_BP_DIRECT	GO:0007015~actin filament organization	9	0.065795	ALDOA, ARF1, MYO1B, SORBS2, FAT1, FSCN1, ACTN1, SPTA1, CTNNA1	2.08234
GOTERM_BP_DIRECT	GO:1900034~regulation of cellular response to heat	9	0.0795574	HSPA1L, HSP90AB1, HSP90AA1, NUP210, NUP188, HSPA1A, HSPA1B, YWHAE, HSPA8	1.99905
GOTERM_BP_DIRECT	GO:0006816~calcium ion transport	9	0.0844978	ANXA6, CACNA2D1, CAV1, PANX1, FYN, SLC3A2, RYR1, CACNA1D, CACNA1S	1.97274
GOTERM_BP_DIRECT	GO:1904871~positive regulation of protein localization to Cajal body	8	2.07393e-08	CCT7, CCT5, TCP1, CCT4, CCT8, CCT2, CCT3, CCT6A	16.6587
GOTERM_BP_DIRECT	GO:0007016~cytoskeletal anchoring at plasma membrane	8	7.28759e-07	JUP, EPB41L3, TLN1, EZR, TLN2, ANK3, SPTBN4, FLNB	12.1154
GOTERM_BP_DIRECT	GO:0031581~hemidesmosome assembly	8	1.65815e-06	LAMA3, KRT5, KRT14, LAMC2, LAMC1, CD151, DST, PLEC	11.1058
GOTERM_BP_DIRECT	GO:0033344~cholesterol efflux	8	0.000505215	ABCA7, NPC1, APOB, APOA1, APOE, ABCA2, ABCA1, ABCA5	5.33079
GOTERM_BP_DIRECT	GO:0000281~mitotic cytokinesis	8	0.00132929	CKAP2, SNX9, KIF4B, CHMP4B, ANK3, MITD1, SNX33, APC	4.59551
GOTERM_BP_DIRECT	GO:1900740~positive regulation of protein insertion into mitochondrial membrane involved in apoptotic signaling pathway	8	0.00164529	YWHAZ, YWHAG, YWHAH, YWHAB, YWHAQ, PPP3CC, TP63, YWHAE	4.44233
GOTERM_BP_DIRECT	GO:0045765~regulation of angiogenesis	8	0.00201673	WARS, NF1, RNH1, KRT1, PLXND1, GPNMB, ADGRA2, CTNNB1	4.29903
GOTERM_BP_DIRECT	GO:0046034~ATP metabolic process	8	0.00244983	ATP6V1A, VCP, HSPA1A, HSPA1B, ATP6V1B2, MYH6, ATP1A2, HSPA8	4.16468
GOTERM_BP_DIRECT	GO:0001932~regulation of protein phosphorylation	8	0.00352715	CORO1C, PHIP, APOA1, CCDC88C, PLXNB2, PML, CELSR3, FN1	3.9197
GOTERM_BP_DIRECT	GO:0033572~transferrin transport	8	0.00418492	TCIRG1, STEAP3, ATP6V1A, TFRC, RAB11B, ATP6V1B2, CLTC, ATP6V0D1	3.80771
GOTERM_BP_DIRECT	GO:0007339~binding of sperm to zona pellucida	8	0.00418492	HSPA1L, CCT7, CCT5, TCP1, CCT4, CCT8, CCT2, CCT3	3.80771
GOTERM_BP_DIRECT	GO:2001237~negative regulation of extrinsic apoptotic signaling pathway	8	0.0067191	PHIP, NRP1, LGALS3, ITGAV, LMNA, BIRC6, TCF7L2, GSTP1	3.5071
GOTERM_BP_DIRECT	GO:0042157~lipoprotein metabolic process	8	0.0067191	APOB, APOA1, LPA, LRP1, APOE, ALB, HSPG2, ABCA1	3.5071
GOTERM_BP_DIRECT	GO:0006605~protein targeting	8	0.00777471	YWHAZ, YWHAG, MYO1C, PML, YWHAB, YWHAQ, RPL11, YWHAE	3.41718
GOTERM_BP_DIRECT	GO:0045184~establishment of protein localization	8	0.00894778	CORO1C, VCP, ANK3, IST1, ITGA2, ABL1, KPNB1, FLNA	3.33175
GOTERM_BP_DIRECT	GO:0006418~tRNA aminoacylation for protein translation	8	0.00894778	WARS, YARS, DARS, NARS, SARS, RARS, AARS, GARS	3.33175
GOTERM_BP_DIRECT	GO:0031397~negative regulation of protein ubiquitination	8	0.0102455	UFL1, CAV1, FYN, DNAJA1, KLHL40, HSPA1A, HSPA1B, VPS28	3.25048
GOTERM_BP_DIRECT	GO:0051496~positive regulation of stress fiber assembly	8	0.0116749	PFN1, PFN2, APOA1, RAC1, RHOA, AMOT, LPAR1, ARHGEF15	3.17309
GOTERM_BP_DIRECT	GO:0010977~negative regulation of neuron projection development	8	0.0149565	GFAP, LRP1, LGALS1, VIM, DPYSL3, LPAR1, ITM2C, B2M	3.02886
GOTERM_BP_DIRECT	GO:0031532~actin cytoskeleton reorganization	8	0.0210351	EZR, ANXA1, RHOA, PTK7, RALA, KIT, MYH9, FLNA	2.83553
GOTERM_BP_DIRECT	GO:0007519~skeletal muscle tissue development	8	0.0315484	MYL6, IGSF8, CAV1, COL19A1, NF1, MYH14, DCN, FLNB	2.61313
GOTERM_BP_DIRECT	GO:0032880~regulation of protein localization	8	0.0346414	UFL1, RACK1, CEP120, PICALM, RAB14, VPS4A, CELSR3, PRNP	2.56288
GOTERM_BP_DIRECT	GO:0006749~glutathione metabolic process	8	0.0489933	GGT5, G6PD, EEF1G, IDH1, CLIC1, GSTO1, GSTP1, SOD2	2.37982
GOTERM_BP_DIRECT	GO:0021987~cerebral cortex development	8	0.0489933	SLC38A2, CEP120, LRP1, ATIC, NF1, H2AFX, YWHAE, ASPM	2.37982
GOTERM_BP_DIRECT	GO:0051592~response to calcium ion	8	0.0573977	EGFR, ANXA7, CAV1, PTGES, FGB, ANXA11, TTN, PDCD6	2.29776
GOTERM_BP_DIRECT	GO:0045732~positive regulation of protein catabolic process	8	0.066641	RAB7A, APC2, VCP, NDFIP1, GJA1, C4BPA, VPS28, APC	2.22116
GOTERM_BP_DIRECT	GO:0008104~protein localization	8	0.0715794	CAV1, SQSTM1, IST1, RAB35, CD81, NBEA, KIF26A, KIF26B	2.18475
GOTERM_BP_DIRECT	GO:0060337~type I interferon signaling pathway	8	0.0876606	HLA-H, IFITM2, IFITM3, HLA-A, JAK1, HLA-C, HLA-B, HLA-G	2.08234
GOTERM_BP_DIRECT	GO:0043087~regulation of GTPase activity	8	0.0934403	TBC1D15, SBF1, RALBP1, PLXNB2, RAB3GAP1, NF1, IQGAP1, EPHA3	2.05031
GOTERM_BP_DIRECT	GO:1904851~positive regulation of establishment of protein localization to telomere	7	3.29205e-06	CCT7, CCT5, TCP1, CCT4, CCT8, CCT2, CCT6A	12.9568
GOTERM_BP_DIRECT	GO:0002480~antigen processing and presentation of exogenous peptide antigen via MHC class I, TAP-independent	7	3.29205e-06	LNPEP, HLA-H, HLA-A, HLA-C, HLA-B, HLA-G, B2M	12.9568
GOTERM_BP_DIRECT	GO:0019068~virion assembly	7	3.09604e-05	APOE, PPIA, UBC, RAB1B, UBB, UBA52, RPS27A	9.71759
GOTERM_BP_DIRECT	GO:1903543~positive regulation of exosomal secretion	7	0.000143458	RAB7A, TSG101, VPS4B, VPS4A, SDCBP, STAM, PDCD6IP	7.77407
GOTERM_BP_DIRECT	GO:0039702~viral budding via host ESCRT complex	7	0.0014889	TSG101, CHMP4B, VPS4B, VPS4A, MITD1, PDCD6IP, VPS28	5.30051
GOTERM_BP_DIRECT	GO:0002227~innate immune response in mucosa	7	0.00302903	HIST1H2BC, H2BFS, HIST1H2BD, HIST1H2BK, HIST2H2BE, HIST1H2BJ, LTF	4.66444
GOTERM_BP_DIRECT	GO:0005978~glycogen biosynthetic process	7	0.00374097	GBE1, PGM1, UBC, UBB, UBA52, RPS27A, UGP2	4.48504
GOTERM_BP_DIRECT	GO:0001937~negative regulation of endothelial cell proliferation	7	0.00662112	CAV1, APOE, NF1, APOH, GJA1, ATP5A1, ENG	4.02107
GOTERM_BP_DIRECT	GO:0045214~sarcomere organization	7	0.00662112	ACTG1, OBSCN, KRT19, WDR1, MYH6, TTN, ITGB1	4.02107
GOTERM_BP_DIRECT	GO:0007163~establishment or maintenance of cell polarity	7	0.00662112	ACTR3, ACTR2, SYNE2, FAT1, CLASP1, CAP1, CTNNA1	4.02107
GOTERM_BP_DIRECT	GO:0043542~endothelial cell migration	7	0.00662112	CDH13, FAP, RHOA, PLXND1, LOXL2, ADGRA2, DPP4	4.02107
GOTERM_BP_DIRECT	GO:0034504~protein localization to nucleus	7	0.00786507	ABCA7, SYNE2, PIKFYVE, LMNA, RPL11, COL1A1, CALR	3.88704
GOTERM_BP_DIRECT	GO:0030032~lamellipodium assembly	7	0.00926867	ARHGEF4, CDH13, RAC1, CYFIP1, KIT, CAPZB, VCL	3.76165
GOTERM_BP_DIRECT	GO:0042769~DNA damage response, detection of DNA damage	7	0.0190314	POLD1, DDB1, UBC, DNAJA1, UBB, UBA52, RPS27A	3.2392
GOTERM_BP_DIRECT	GO:0090307~mitotic spindle assembly	7	0.0190314	OFD1, RHOA, RAB11A, CLASP1, CLTC, KPNB1, FLNA	3.2392
GOTERM_BP_DIRECT	GO:0034332~adherens junction organization	7	0.0215974	JUP, CDH13, CDH15, RAB8B, CTNNA1, NUMBL, CDH11	3.15165
GOTERM_BP_DIRECT	GO:0007162~negative regulation of cell adhesion	7	0.0215974	CDH13, FBLN1, ADAM10, ERBB3, PLXNB2, TNC, TGFBI	3.15165
GOTERM_BP_DIRECT	GO:0007080~mitotic metaphase plate congression	7	0.0215974	KIF22, CHMP4B, VPS4B, VPS4A, RAB11A, PDCD6IP, KPNB1	3.15165
GOTERM_BP_DIRECT	GO:0030049~muscle filament sliding	7	0.0243871	MYL6, ACTC1, NEB, ACTA1, VIM, MYH6, TTN	3.06871
GOTERM_BP_DIRECT	GO:0006024~glycosaminoglycan biosynthetic process	7	0.037914	GPC4, HEXA, GPC6, UGDH, HSPG2, PDGFRB, SDC3	2.77646
GOTERM_BP_DIRECT	GO:0034613~cellular protein localization	7	0.0419148	LAMTOR1, GRID2, AMOT, CD63, CTNNA1, CTNNB1, RRAGC	2.71189
GOTERM_BP_DIRECT	GO:0030155~regulation of cell adhesion	7	0.0419148	LAMA2, LAMA4, LAMA3, LAMA5, PML, ABL1, ENG	2.71189
GOTERM_BP_DIRECT	GO:0043434~response to peptide hormone	7	0.0461713	BSG, GNAI2, ATP2A2, ANXA1, GJA1, COL1A1, TIMP1	2.65025
GOTERM_BP_DIRECT	GO:0061337~cardiac conduction	7	0.0506866	TRPM4, CACNA2D1, SPTBN4, AKAP9, CACNA1C, CACNA1D, CACNA1S	2.59136
GOTERM_BP_DIRECT	GO:0031100~organ regeneration	7	0.0605008	PKM, APOA1, ATIC, IGF2R, AXL, GSTP1, LCP1	2.48109
GOTERM_BP_DIRECT	GO:0014070~response to organic cyclic compound	7	0.0713653	KAT2A, ANXA7, NAMPT, G6PD, PTGES, MMP14, CPT1A	2.37982
GOTERM_BP_DIRECT	GO:0034329~cell junction assembly	6	0.000426478	ACTB, ACTG1, FERMT2, ILK, FLNC, FLNA	8.32937
GOTERM_BP_DIRECT	GO:0051131~chaperone-mediated protein complex assembly	6	0.000658915	HSP90AA1, CCT6B, CLU, HSPA4, CCT2, HSPD1	7.68864
GOTERM_BP_DIRECT	GO:0010952~positive regulation of peptidase activity	6	0.000658915	CAV1, FBLN1, APP, MMP14, PCOLCE, FN1	7.68864
GOTERM_BP_DIRECT	GO:0010875~positive regulation of cholesterol efflux	6	0.000974608	ABCA7, LRP1, APOE, ABCA1, PLTP, ABCA12	7.13946
GOTERM_BP_DIRECT	GO:0033700~phospholipid efflux	6	0.000974608	ABCA7, APOA1, APOE, ABCA2, ABCA1, ABCA12	7.13946
GOTERM_BP_DIRECT	GO:0070208~protein heterotrimerization	6	0.000974608	GNB1, COL1A2, COL6A2, COL6A1, COL1A1, WIZ	7.13946
GOTERM_BP_DIRECT	GO:0043277~apoptotic cell clearance	6	0.00139018	CD36, LRP1, ITGAV, TXNDC5, AXL, PDIA6	6.66349
GOTERM_BP_DIRECT	GO:0045109~intermediate filament organization	6	0.00192303	KRT9, GFAP, KRT17, VIM, KRT2, KRT71	6.24702
GOTERM_BP_DIRECT	GO:0030301~cholesterol transport	6	0.00192303	CAV1, NPC1, APOB, APOA1, CD36, VPS4B	6.24702
GOTERM_BP_DIRECT	GO:0030033~microvillus assembly	6	0.00259106	RAP2B, MYO1A, EZR, RAP2C, RAP1A, RAP1B	5.87955
GOTERM_BP_DIRECT	GO:0030705~cytoskeleton-dependent intracellular transport	6	0.00341246	TUBB, KIF26A, TUBA1A, TUBA1B, TUBA1C, KIF26B	5.55291
GOTERM_BP_DIRECT	GO:0036120~cellular response to platelet-derived growth factor stimulus	6	0.00341246	CORO1B, FYN, PDGFRB, PDGFD, YES1, IQGAP1	5.55291
GOTERM_BP_DIRECT	GO:0006892~post-Golgi vesicle-mediated transport	6	0.00440545	SCAMP3, STX4, ARF1, MYO1B, VAMP7, VAMP2	5.26065
GOTERM_BP_DIRECT	GO:0006883~cellular sodium ion homeostasis	6	0.00440545	SLC8A1, ATP1B3, ATP4A, ATP1A1, ATP1A2, ATP12A	5.26065
GOTERM_BP_DIRECT	GO:0042744~hydrogen peroxide catabolic process	6	0.00558811	PXDN, PRDX6, PRDX2, HBA1, HBB, PRDX1	4.99762
GOTERM_BP_DIRECT	GO:0048844~artery morphogenesis	6	0.00697811	NOTCH3, APOB, NRP1, APOE, NF1, ENG	4.75964
GOTERM_BP_DIRECT	GO:0034314~Arp2/3 complex-mediated actin nucleation	6	0.00859258	ACTR3, ACTR2, ARPC1B, ARPC2, ARPC4, ARPC5	4.54329
GOTERM_BP_DIRECT	GO:0006090~pyruvate metabolic process	6	0.00859258	LDHB, SLC16A1, LDHA, BSG, LDHAL6B, DLAT	4.54329
GOTERM_BP_DIRECT	GO:0030866~cortical actin cytoskeleton organization	6	0.0125597	EPB41L3, TLN1, ARF6, RAB13, CALR, EHD2	4.16468
GOTERM_BP_DIRECT	GO:0032456~endocytic recycling	6	0.0125597	RAB35, RAB14, RAB13, EHD1, EHD2, EHD4	4.16468
GOTERM_BP_DIRECT	GO:0006297~nucleotide-excision repair, DNA gap filling	6	0.0125597	POLD1, POLE, UBC, UBB, UBA52, RPS27A	4.16468
GOTERM_BP_DIRECT	GO:0002040~sprouting angiogenesis	6	0.0149423	CDH13, NRP1, LOXL2, ADGRA2, ENG, RNF213	3.9981
GOTERM_BP_DIRECT	GO:0007159~leukocyte cell-cell adhesion	6	0.0149423	EZR, ITGA5, MSN, ITGA4, NT5E, ITGB1	3.9981
GOTERM_BP_DIRECT	GO:0060976~coronary vasculature development	6	0.0149423	MEGF8, AP2B1, SNX17, DYNC2H1, PTK7, PLXND1	3.9981
GOTERM_BP_DIRECT	GO:0006904~vesicle docking involved in exocytosis	6	0.0176093	RAB8A, RAB8B, STXBP1, STXBP2, STXBP3, RAB13	3.84432
GOTERM_BP_DIRECT	GO:0031069~hair follicle morphogenesis	6	0.0205728	KRT27, KRT17, TP63, GORAB, KRT71, CTNNB1	3.70194
GOTERM_BP_DIRECT	GO:0043001~Golgi to plasma membrane protein transport	6	0.0205728	MACF1, ANK3, VAMP7, VAMP2, RAB10, GOLGA4	3.70194
GOTERM_BP_DIRECT	GO:0010107~potassium ion import	6	0.0238438	ABCC9, ATP1B3, ATP4A, ATP1A1, ATP1A2, ATP12A	3.56973
GOTERM_BP_DIRECT	GO:0001569~patterning of blood vessels	6	0.0238438	GNA13, NRP1, PLXND1, RBM15, ENG, CTNNB1	3.56973
GOTERM_BP_DIRECT	GO:2000145~regulation of cell motility	6	0.0238438	EGFR, ERBB3, DIAPH1, CD81, RHOA, ABL1	3.56973
GOTERM_BP_DIRECT	GO:0050766~positive regulation of phagocytosis	6	0.0274319	ABCA7, CD47, C3, RAP1A, CALR, PTX3	3.44663
GOTERM_BP_DIRECT	GO:0030203~glycosaminoglycan metabolic process	6	0.0274319	GPC4, GPC6, HSPG2, VCAN, DCN, SDC3	3.44663
GOTERM_BP_DIRECT	GO:0030449~regulation of complement activation	6	0.0313453	C9, C3, CD59, C5, VTN, C4BPA	3.33175
GOTERM_BP_DIRECT	GO:0045773~positive regulation of axon extension	6	0.0313453	MACF1, ILK, RAB11A, GOLGA4, FN1, ISLR2	3.33175
GOTERM_BP_DIRECT	GO:0098656~anion transmembrane transport	6	0.0313453	ABCC9, SLC4A7, ABCC1, ABCC2, ABCA1, VDAC1	3.33175
GOTERM_BP_DIRECT	GO:1990090~cellular response to nerve growth factor stimulus	6	0.0355908	KAT2A, APP, MAGI2, RAB35, RAP1A, EHD1	3.22427
GOTERM_BP_DIRECT	GO:0009306~protein secretion	6	0.0401738	STEAP3, RAB8A, RAB8B, GNAS, RAB13, CANX	3.12351
GOTERM_BP_DIRECT	GO:0070911~global genome nucleotide-excision repair	6	0.0401738	UBE2N, DDB1, UBC, UBB, UBA52, RPS27A	3.12351
GOTERM_BP_DIRECT	GO:0045907~positive regulation of vasoconstriction	6	0.0401738	TRPM4, EGFR, CAV1, FGB, GJA1, ABL1	3.12351
GOTERM_BP_DIRECT	GO:0071526~semaphorin-plexin signaling pathway	6	0.0450985	SEMA6B, NRP1, PLXNB2, RAC1, PLXND1, FLNA	3.02886
GOTERM_BP_DIRECT	GO:0002755~MyD88-dependent toll-like receptor signaling pathway	6	0.0450985	CD36, UBC, HSPD1, UBB, UBA52, RPS27A	3.02886
GOTERM_BP_DIRECT	GO:0010634~positive regulation of epithelial cell migration	6	0.0450985	GLIPR2, PFN1, RAB11A, ITGA2, CLASP1, DOCK5	3.02886
GOTERM_BP_DIRECT	GO:0043588~skin development	6	0.0503673	KRT9, JUP, FRAS1, RYR1, COL5A3, COL5A2	2.93978
GOTERM_BP_DIRECT	GO:0050919~negative chemotaxis	6	0.0503673	SEMA6B, APOA1, ITGAV, RHOA, ITGB3, SLIT3	2.93978
GOTERM_BP_DIRECT	GO:0019985~translesion synthesis	6	0.0619414	VCP, POLD1, UBC, UBB, UBA52, RPS27A	2.77646
GOTERM_BP_DIRECT	GO:0034605~cellular response to heat	6	0.0682451	NF1, HSPA6, HSPA1A, HSPA1B, PDCD6, MYOF	2.70142
GOTERM_BP_DIRECT	GO:0006296~nucleotide-excision repair, DNA incision, 5'-to lesion	6	0.0682451	POLD1, DDB1, UBC, UBB, UBA52, RPS27A	2.70142
GOTERM_BP_DIRECT	GO:0048813~dendrite morphogenesis	6	0.0682451	PICALM, FYN, RAC1, CELSR2, ITGB1, FARP1	2.70142
GOTERM_BP_DIRECT	GO:0033683~nucleotide-excision repair, DNA incision	6	0.0748903	POLD1, DDB1, UBC, UBB, UBA52, RPS27A	2.63033
GOTERM_BP_DIRECT	GO:0001568~blood vessel development	6	0.0748903	LAMA4, ITGAV, COL1A2, COL1A1, TCF7L2, PLPP3	2.63033
GOTERM_BP_DIRECT	GO:0007223~Wnt signaling pathway, calcium modulating pathway	6	0.0818731	GNB1, ROR2, TNRC6A, PLCB2, TCF7L2, CTNNB1	2.56288
GOTERM_BP_DIRECT	GO:0050890~cognition	6	0.0818731	SLC1A4, CHD7, NF1, CYFIP1, DOPEY2, GNAS	2.56288
GOTERM_BP_DIRECT	GO:0038083~peptidyl-tyrosine autophosphorylation	6	0.0891885	FYN, JAK1, ABL1, YES1, SRMS, KDR	2.49881
GOTERM_BP_DIRECT	GO:0038027~apolipoprotein A-I-mediated signaling pathway	5	6.12312e-05	ABCA7, ITGAV, RHOA, ABCA1, ITGB3	16.6587
GOTERM_BP_DIRECT	GO:0030953~astral microtubule organization	5	0.000174932	EZR, CEP120, RAB11A, CLASP1, KPNB1	13.8823
GOTERM_BP_DIRECT	GO:0019076~viral release from host cell	5	0.000174932	RAB7A, PPIA, IST1, VPS4B, VPS4A	13.8823
GOTERM_BP_DIRECT	GO:0043297~apical junction assembly	5	0.000740559	RHOA, WDR1, CTNNA1, FBF1, VCL	10.4117
GOTERM_BP_DIRECT	GO:0015825~L-serine transport	5	0.00126982	SLC1A4, SLC1A5, SERINC5, SERINC1, SLC38A7	9.25485
GOTERM_BP_DIRECT	GO:0071404~cellular response to low-density lipoprotein particle stimulus	5	0.00126982	CD9, NPC1, CD36, CD81, ITGB1	9.25485
GOTERM_BP_DIRECT	GO:0036376~sodium ion export from cell	5	0.00201627	ATP1B3, ATP4A, ATP1A1, ATP1A2, ATP12A	8.32937
GOTERM_BP_DIRECT	GO:1902188~positive regulation of viral release from host cell	5	0.0030189	TSG101, CHMP4B, DDB1, VPS4B, VPS4A	7.57215
GOTERM_BP_DIRECT	GO:0051764~actin crosslink formation	5	0.0030189	ACTN1, DPYSL3, FLNA, PLS3, LCP1	7.57215
GOTERM_BP_DIRECT	GO:0006098~pentose-phosphate shunt	5	0.0030189	TPI1, G6PD, PGD, DERA, TKT	7.57215
GOTERM_BP_DIRECT	GO:0055119~relaxation of cardiac muscle	5	0.00431511	P2RX4, SLC8A1, ATP2A2, ATP1A1, ATP1A2	6.94114
GOTERM_BP_DIRECT	GO:0030007~cellular potassium ion homeostasis	5	0.00431511	ATP1B3, ATP4A, ATP1A1, ATP1A2, ATP12A	6.94114
GOTERM_BP_DIRECT	GO:0086012~membrane depolarization during cardiac muscle cell action potential	5	0.00594009	CACNA2D1, SLC8A1, ATP1A2, CACNA1C, CACNA1D	6.4072
GOTERM_BP_DIRECT	GO:0086064~cell communication by electrical coupling involved in cardiac conduction	5	0.00594009	SLC8A1, GJA1, ATP1A1, ATP1A2, CACNA1C	6.4072
GOTERM_BP_DIRECT	GO:0010248~establishment or maintenance of transmembrane electrochemical gradient	5	0.00594009	ATP1B3, ATP4A, ATP1A1, ATP1A2, ATP12A	6.4072
GOTERM_BP_DIRECT	GO:0034975~protein folding in endoplasmic reticulum	5	0.00594009	HSP90B1, PDIA3, HSPA5, CALR, CANX	6.4072
GOTERM_BP_DIRECT	GO:0015671~oxygen transport	5	0.010303	HBG1, HBA1, HBG2, HBE1, HBB	5.55291
GOTERM_BP_DIRECT	GO:0043162~ubiquitin-dependent protein catabolic process via the multivesicular body sorting pathway	5	0.0130964	TSG101, VPS4B, NDFIP1, VPS4A, VPS28	5.20585
GOTERM_BP_DIRECT	GO:0007034~vacuolar transport	5	0.0130964	CLN3, CHMP4B, NDFIP1, NDFIP2, ATP6V0D1	5.20585
GOTERM_BP_DIRECT	GO:0086002~cardiac muscle cell action potential involved in contraction	5	0.0130964	CACNA2D1, CACNA1G, ATP1A1, CACNA1C, CACNA1D	5.20585
GOTERM_BP_DIRECT	GO:0061028~establishment of endothelial barrier	5	0.0130964	EZR, RAP1A, RAP1B, MSN, MYADM	5.20585
GOTERM_BP_DIRECT	GO:0070509~calcium ion import	5	0.0163288	SLC8A1, SLC30A1, CACNA1G, CACNA1H, CACNA1D	4.89963
GOTERM_BP_DIRECT	GO:0031589~cell-substrate adhesion	5	0.0163288	ITGA5, ITGAV, ITGA2, ITGB3, ITGB1	4.89963
GOTERM_BP_DIRECT	GO:0000920~cell separation after cytokinesis	5	0.0200192	CHMP4B, VPS4B, VPS4A, MITD1, PDCD6IP	4.62743
GOTERM_BP_DIRECT	GO:0043691~reverse cholesterol transport	5	0.0200192	APOA1, APOE, CLU, ABCA1, ABCA5	4.62743
GOTERM_BP_DIRECT	GO:1990138~neuron projection extension	5	0.0241828	ALCAM, TIAM1, CPNE1, POSTN, IQGAP1	4.38388
GOTERM_BP_DIRECT	GO:0070987~error-free translesion synthesis	5	0.0241828	VCP, UBC, UBB, UBA52, RPS27A	4.38388
GOTERM_BP_DIRECT	GO:0002026~regulation of the force of heart contraction	5	0.0241828	SLC8A1, ATP2A2, ATP1A1, MYH6, ATP1A2	4.38388
GOTERM_BP_DIRECT	GO:0014911~positive regulation of smooth muscle cell migration	5	0.0288315	NRP1, PDGFRB, ITGA2, POSTN, VTN	4.16468
GOTERM_BP_DIRECT	GO:0072583~clathrin-mediated endocytosis	5	0.0288315	AP2B1, PICALM, AP2A1, HIP1R, CANX	4.16468
GOTERM_BP_DIRECT	GO:0002028~regulation of sodium ion transport	5	0.0339735	P2RX4, SLC8A1, YWHAH, SPTBN4, ATP1A1	3.96636
GOTERM_BP_DIRECT	GO:0045332~phospholipid translocation	5	0.0396136	ABCA7, ATP9B, ATP8B2, ABCA1, ATP8B4	3.78608
GOTERM_BP_DIRECT	GO:0000717~nucleotide-excision repair, DNA duplex unwinding	5	0.0396136	DDB1, UBC, UBB, UBA52, RPS27A	3.78608
GOTERM_BP_DIRECT	GO:0034113~heterotypic cell-cell adhesion	5	0.0396136	ITGA5, ITGAV, ITGA4, ITGB3, ITGB1	3.78608
GOTERM_BP_DIRECT	GO:0000715~nucleotide-excision repair, DNA damage recognition	5	0.0457538	DDB1, UBC, UBB, UBA52, RPS27A	3.62146
GOTERM_BP_DIRECT	GO:0048041~focal adhesion assembly	5	0.0523926	LAMA5, FERMT2, ACTN1, ITGA2, THY1	3.47057
GOTERM_BP_DIRECT	GO:0071353~cellular response to interleukin-4	5	0.0523926	HSP90AB1, PML, FASN, HSPA5, TUBA1B	3.47057
GOTERM_BP_DIRECT	GO:0048870~cell motility	5	0.0523926	FSCN1, RAC1, MMP14, DST, ENG	3.47057
GOTERM_BP_DIRECT	GO:0045742~positive regulation of epidermal growth factor receptor signaling pathway	5	0.0523926	HIP1R, UBC, UBB, UBA52, RPS27A	3.47057
GOTERM_BP_DIRECT	GO:0070423~nucleotide-binding oligomerization domain containing signaling pathway	5	0.059526	UBE2N, UBC, UBB, UBA52, RPS27A	3.33175
GOTERM_BP_DIRECT	GO:0046686~response to cadmium ion	5	0.059526	GPI, NPC1, PRNP, SOD2, B2M	3.33175
GOTERM_BP_DIRECT	GO:0042327~positive regulation of phosphorylation	5	0.059526	EGFR, ILK, SDCBP, ITSN1, MIF	3.33175
GOTERM_BP_DIRECT	GO:0006027~glycosaminoglycan catabolic process	5	0.0671472	GPC4, HGSNAT, GPC6, HSPG2, SDC3	3.2036
GOTERM_BP_DIRECT	GO:0030041~actin filament polymerization	5	0.0671472	GSN, DIAPH1, RAC1, ARPC4, ABL1	3.2036
GOTERM_BP_DIRECT	GO:0017157~regulation of exocytosis	5	0.0671472	STX4, RAB3C, RALA, VAMP2, RAB21	3.2036
GOTERM_BP_DIRECT	GO:0090383~phagosome acidification	5	0.0752471	TCIRG1, ATP6V1A, RAB7A, ATP6V1B2, ATP6V0D1	3.08495
GOTERM_BP_DIRECT	GO:0086010~membrane depolarization during action potential	5	0.0838143	YWHAH, CACNA1G, CACNA1H, CACNA1S, SCN10A	2.97477
GOTERM_BP_DIRECT	GO:0006294~nucleotide-excision repair, preincision complex assembly	5	0.0928355	DDB1, UBC, UBB, UBA52, RPS27A	2.87219
GOTERM_BP_DIRECT	GO:0048008~platelet-derived growth factor receptor signaling pathway	5	0.0928355	NRP1, PDGFRA, PDGFRB, PDGFD, IQGAP1	2.87219
GOTERM_BP_DIRECT	GO:0017038~protein import	4	0.00196232	LAMP2, APOE, CLU, SNX33	13.327
GOTERM_BP_DIRECT	GO:0090611~ubiquitin-independent protein catabolic process via the multivesicular body sorting pathway	4	0.00196232	CHMP4B, VPS4B, VPS4A, PDCD6IP	13.327
GOTERM_BP_DIRECT	GO:0007044~cell-substrate junction assembly	4	0.0037497	TLN1, ITGA5, ITGB3, FN1	11.1058
GOTERM_BP_DIRECT	GO:0043312~neutrophil degranulation	4	0.00627042	VAMP7, STXBP2, STXBP3, VAMP2	9.51927
GOTERM_BP_DIRECT	GO:0034380~high-density lipoprotein particle assembly	4	0.00958834	ABCA7, APOA1, APOE, ABCA1	8.32937
GOTERM_BP_DIRECT	GO:0031102~neuron projection regeneration	4	0.00958834	GFAP, APOA1, PTPRF, APOE	8.32937
GOTERM_BP_DIRECT	GO:0048227~plasma membrane to endosome transport	4	0.00958834	RAB5B, RAB5C, RAB35, RAB11A	8.32937
GOTERM_BP_DIRECT	GO:0090150~establishment of protein localization to membrane	4	0.00958834	NPC1, RAB11B, RAB11A, RAB10	8.32937
GOTERM_BP_DIRECT	GO:0043589~skin morphogenesis	4	0.0137476	COL1A2, TP63, ITGA2, COL1A1	7.40388
GOTERM_BP_DIRECT	GO:0042158~lipoprotein biosynthetic process	4	0.0137476	P4HB, APOB, APOA1, APOE	7.40388
GOTERM_BP_DIRECT	GO:0060020~Bergmann glial cell differentiation	4	0.0137476	GFAP, VIM, ABL1, PLPP3	7.40388
GOTERM_BP_DIRECT	GO:0010863~positive regulation of phospholipase C activity	4	0.0137476	FLT1, PDGFRA, PDGFRB, KIT	7.40388
GOTERM_BP_DIRECT	GO:0008354~germ cell migration	4	0.0137476	KIT, PLPP1, ITGB1, PLPP3	7.40388
GOTERM_BP_DIRECT	GO:0032060~bleb assembly	4	0.0187753	LPAR1, EMP3, ANO6, EMP1	6.66349
GOTERM_BP_DIRECT	GO:0051639~actin filament network formation	4	0.0187753	ACTN1, ARPC5, PLS3, LCP1	6.66349
GOTERM_BP_DIRECT	GO:0090084~negative regulation of inclusion body assembly	4	0.0187753	HSPA2, SACS, HSPA1A, HSPA1B	6.66349
GOTERM_BP_DIRECT	GO:0032486~Rap protein signal transduction	4	0.0187753	RAP2B, RAP2C, RAP1A, RAP1B	6.66349
GOTERM_BP_DIRECT	GO:0010737~protein kinase A signaling	4	0.0187753	EZR, FBN1, RAB13, LCP1	6.66349
GOTERM_BP_DIRECT	GO:0033690~positive regulation of osteoblast proliferation	4	0.024684	ITGAV, LTF, ABL1, TMEM119	6.05772
GOTERM_BP_DIRECT	GO:0098911~regulation of ventricular cardiac muscle cell action potential	4	0.024684	TRPM4, JUP, CAV1, CACNA1C	6.05772
GOTERM_BP_DIRECT	GO:0019430~removal of superoxide radicals	4	0.0314736	PRDX2, PRDX1, SOD3, SOD2	5.55291
GOTERM_BP_DIRECT	GO:2000010~positive regulation of protein localization to cell surface	4	0.0314736	HSP90AB1, STX4, SNX33, ABCA12	5.55291
GOTERM_BP_DIRECT	GO:0055003~cardiac myofibril assembly	4	0.0314736	ACTC1, PDGFRA, PDGFRB, TTN	5.55291
GOTERM_BP_DIRECT	GO:0030195~negative regulation of blood coagulation	4	0.0314736	SERPINE2, APOE, APOH, VTN	5.55291
GOTERM_BP_DIRECT	GO:0010939~regulation of necrotic cell death	4	0.0314736	UBC, UBB, UBA52, RPS27A	5.55291
GOTERM_BP_DIRECT	GO:0030837~negative regulation of actin filament polymerization	4	0.0391336	PFN1, PFN2, HIP1R, MYADM	5.12576
GOTERM_BP_DIRECT	GO:0045995~regulation of embryonic development	4	0.0391336	LAMA2, LAMA4, LAMA3, LAMA5	5.12576
GOTERM_BP_DIRECT	GO:0071360~cellular response to exogenous dsRNA	4	0.0391336	CIITA, CAV1, FLOT1, RALB	5.12576
GOTERM_BP_DIRECT	GO:0002756~MyD88-independent toll-like receptor signaling pathway	4	0.0391336	UBC, UBB, UBA52, RPS27A	5.12576
GOTERM_BP_DIRECT	GO:0019752~carboxylic acid metabolic process	4	0.0391336	LDHB, LDHA, LDHAL6B, MIF	5.12576
GOTERM_BP_DIRECT	GO:0030516~regulation of axon extension	4	0.0391336	APOE, DPYSL2, ABL1, RAB21	5.12576
GOTERM_BP_DIRECT	GO:1900025~negative regulation of substrate adhesion-dependent cell spreading	4	0.0391336	CORO1C, FBLN1, ACTN4, POSTN	5.12576
GOTERM_BP_DIRECT	GO:0032479~regulation of type I interferon production	4	0.0391336	UBC, UBB, UBA52, RPS27A	5.12576
GOTERM_BP_DIRECT	GO:0010745~negative regulation of macrophage derived foam cell differentiation	4	0.0391336	ITGAV, ABCA1, ITGB3, ABCA5	5.12576
GOTERM_BP_DIRECT	GO:0051016~barbed-end actin filament capping	4	0.0476447	TRIOBP, GSN, CAPZA1, CAPZB	4.75964
GOTERM_BP_DIRECT	GO:1901673~regulation of mitotic spindle assembly	4	0.0476447	CEP97, CHMP4B, VPS4B, PDCD6IP	4.75964
GOTERM_BP_DIRECT	GO:0031529~ruffle organization	4	0.0476447	CORO1B, RAC1, CYFIP1, ARF6	4.75964
GOTERM_BP_DIRECT	GO:0043409~negative regulation of MAPK cascade	4	0.0476447	CAV1, NF1, RNF149, GSTP1	4.75964
GOTERM_BP_DIRECT	GO:0043254~regulation of protein complex assembly	4	0.0476447	GFAP, HSP90AA1, HCFC1, HSPA8	4.75964
GOTERM_BP_DIRECT	GO:0002009~morphogenesis of an epithelium	4	0.0476447	FRAS1, TIMELESS, KRT16, VCL	4.75964
GOTERM_BP_DIRECT	GO:0080182~histone H3-K4 trimethylation	4	0.0569801	HIST1H1E, HIST1H1D, HIST1H1C, KMT2B	4.44233
GOTERM_BP_DIRECT	GO:0007213~G-protein coupled acetylcholine receptor signaling pathway	4	0.0569801	GNAI2, GNAQ, GNB1, GNA11	4.44233
GOTERM_BP_DIRECT	GO:0045104~intermediate filament cytoskeleton organization	4	0.0569801	KRT6C, KRT16, KRT3, DST	4.44233
GOTERM_BP_DIRECT	GO:0006665~sphingolipid metabolic process	4	0.0569801	SERINC5, SPTLC1, PSAP, SERINC1	4.44233
GOTERM_BP_DIRECT	GO:0034375~high-density lipoprotein particle remodeling	4	0.0569801	APOA1, APOE, PLTP, ABCA5	4.44233
GOTERM_BP_DIRECT	GO:0014002~astrocyte development	4	0.0671071	GFAP, LAMB2, LAMC3, VIM	4.16468
GOTERM_BP_DIRECT	GO:0048488~synaptic vesicle endocytosis	4	0.0671071	ITSN1, CANX, SH3GL2, SCRIB	4.16468
GOTERM_BP_DIRECT	GO:0030949~positive regulation of vascular endothelial growth factor receptor signaling pathway	4	0.0671071	FLT1, ITGA5, VTN, ITGB3	4.16468
GOTERM_BP_DIRECT	GO:0031396~regulation of protein ubiquitination	4	0.0671071	HSP90AB1, HSP90AA1, HSPA1A, HSPA1B	4.16468
GOTERM_BP_DIRECT	GO:0010592~positive regulation of lamellipodium assembly	4	0.0671071	HSP90AA1, ARPC2, FSCN1, RAC1	4.16468
GOTERM_BP_DIRECT	GO:0030048~actin filament-based movement	4	0.0779882	ACTC1, MYO1B, MYH14, MYH9	3.9197
GOTERM_BP_DIRECT	GO:0001702~gastrulation with mouth forming second	4	0.0779882	UGDH, AMOT, PLPP3, CTNNB1	3.9197
GOTERM_BP_DIRECT	GO:0060307~regulation of ventricular cardiac muscle cell membrane repolarization	4	0.0779882	CACNA2D1, GJA1, AKAP9, WDR1	3.9197
GOTERM_BP_DIRECT	GO:1901216~positive regulation of neuron death	4	0.0779882	PICALM, APOE, CLU, ABL1	3.9197
GOTERM_BP_DIRECT	GO:0050860~negative regulation of T cell receptor signaling pathway	4	0.0779882	EZR, LGALS3, PRNP, THY1	3.9197
GOTERM_BP_DIRECT	GO:0051893~regulation of focal adhesion assembly	4	0.0779882	CORO1C, MACF1, CLASP1, EPHA3	3.9197
GOTERM_BP_DIRECT	GO:2000785~regulation of autophagosome assembly	4	0.0779882	RAB7A, PIKFYVE, RAB5A, RAB1B	3.9197
GOTERM_BP_DIRECT	GO:0006414~translational elongation	4	0.089582	EEF1A1, EEF1A1P5, EEF1G, EEF2	3.70194
GOTERM_BP_DIRECT	GO:0007043~cell-cell junction assembly	4	0.089582	TLN1, TLN2, FSCN1, AMOT	3.70194
GOTERM_BP_DIRECT	GO:0061436~establishment of skin barrier	4	0.089582	KRT16, KRT1, TP63, ABCA12	3.70194
GOTERM_BP_DIRECT	GO:0061512~protein localization to cilium	4	0.089582	TTC21B, ARF4, EHD1, TTC21A	3.70194
GOTERM_BP_DIRECT	GO:0001708~cell fate specification	4	0.089582	APC2, ITGB1, CTNNB1, APC	3.70194
GOTERM_BP_DIRECT	GO:0048169~regulation of long-term neuronal synaptic plasticity	4	0.089582	RAB8A, HRAS, NF1, RAB11A	3.70194
GOTERM_BP_DIRECT	GO:0046597~negative regulation of viral entry into host cell	4	0.089582	GSN, IFITM2, IFITM3, PTX3	3.70194
GOTERM_BP_DIRECT	GO:0002486~antigen processing and presentation of endogenous peptide antigen via MHC class I via ER pathway, TAP-independent	3	0.0103487	HLA-A, HLA-C, HLA-B	16.6587
GOTERM_BP_DIRECT	GO:1903551~regulation of extracellular exosome assembly	3	0.0103487	TSG101, STAM, PDCD6IP	16.6587
GOTERM_BP_DIRECT	GO:0030859~polarized epithelial cell differentiation	3	0.0103487	TP63, DLG5, RAB10	16.6587
GOTERM_BP_DIRECT	GO:0061738~late endosomal microautophagy	3	0.0103487	VPS4B, VPS4A, HSPA8	16.6587
GOTERM_BP_DIRECT	GO:1901660~calcium ion export	3	0.0103487	ATP2B1, SLC8A1, ATP2B4	16.6587
GOTERM_BP_DIRECT	GO:0061684~chaperone-mediated autophagy	3	0.0103487	LAMP2, HSP90AA1, HSPA8	16.6587
GOTERM_BP_DIRECT	GO:0042992~negative regulation of transcription factor import into nucleus	3	0.0198757	CD36, NF1, RAB23	12.494
GOTERM_BP_DIRECT	GO:0070370~cellular heat acclimation	3	0.0198757	HSPA6, HSPA1A, HSPA1B	12.494
GOTERM_BP_DIRECT	GO:0090666~scaRNA localization to Cajal body	3	0.0198757	TCP1, CCT4, CCT2	12.494
GOTERM_BP_DIRECT	GO:0014044~Schwann cell development	3	0.0198757	LAMB2, NF1, MED12	12.494
GOTERM_BP_DIRECT	GO:0071681~cellular response to indole-3-methanol	3	0.0318179	JUP, CTNNA1, CTNNB1	9.99524
GOTERM_BP_DIRECT	GO:0006868~glutamine transport	3	0.0318179	SLC1A4, SLC1A5, SLC38A7	9.99524
GOTERM_BP_DIRECT	GO:0034197~triglyceride transport	3	0.0318179	CD36, VAMP7, APOH	9.99524
GOTERM_BP_DIRECT	GO:0051653~spindle localization	3	0.0318179	ACTR3, ACTR2, ASPM	9.99524
GOTERM_BP_DIRECT	GO:0031346~positive regulation of cell projection organization	3	0.0318179	KAT2A, RAB8B, ITGA2	9.99524
GOTERM_BP_DIRECT	GO:0002090~regulation of receptor internalization	3	0.0318179	ARF1, FLOT1, SH3GL2	9.99524
GOTERM_BP_DIRECT	GO:0000904~cell morphogenesis involved in differentiation	3	0.0318179	LAMC3, MYH9, CTNNB1	9.99524
GOTERM_BP_DIRECT	GO:0032489~regulation of Cdc42 protein signal transduction	3	0.0318179	APOA1, APOE, ABCA1	9.99524
GOTERM_BP_DIRECT	GO:1904714~regulation of chaperone-mediated autophagy	3	0.0318179	EEF1A1, GFAP, CTSA	9.99524
GOTERM_BP_DIRECT	GO:0033591~response to L-ascorbic acid	3	0.0318179	ITGA2, GSTP1, SOD2	9.99524
GOTERM_BP_DIRECT	GO:0031325~positive regulation of cellular metabolic process	3	0.0318179	ACACA, FASN, ACLY	9.99524
GOTERM_BP_DIRECT	GO:0030240~skeletal muscle thin filament assembly	3	0.0318179	ACTC1, ACTA1, TTN	9.99524
GOTERM_BP_DIRECT	GO:1902430~negative regulation of beta-amyloid formation	3	0.0318179	ABCA7, APOE, CLU	9.99524
GOTERM_BP_DIRECT	GO:0086045~membrane depolarization during AV node cell action potential	3	0.0318179	TRPM4, CACNA1G, CACNA1C	9.99524
GOTERM_BP_DIRECT	GO:0001765~membrane raft assembly	3	0.045852	FLOT2, FLOT1, ANXA2	8.32937
GOTERM_BP_DIRECT	GO:0097094~craniofacial suture morphogenesis	3	0.045852	MEGF8, RAB23, MMP14	8.32937
GOTERM_BP_DIRECT	GO:0098532~histone H3-K27 trimethylation	3	0.045852	HIST1H1E, HIST1H1D, HIST1H1C	8.32937
GOTERM_BP_DIRECT	GO:0048524~positive regulation of viral process	3	0.045852	RAB7A, TSG101, VPS4B	8.32937
GOTERM_BP_DIRECT	GO:0051223~regulation of protein transport	3	0.045852	RAB8A, DNAJA1, RAB11A	8.32937
GOTERM_BP_DIRECT	GO:1903265~positive regulation of tumor necrosis factor-mediated signaling pathway	3	0.045852	CPNE1, HSPA1A, HSPA1B	8.32937
GOTERM_BP_DIRECT	GO:0044794~positive regulation by host of viral process	3	0.045852	PPIB, APOE, CFL1	8.32937
GOTERM_BP_DIRECT	GO:1990000~amyloid fibril formation	3	0.045852	APP, CD36, GSN	8.32937
GOTERM_BP_DIRECT	GO:0001957~intramembranous ossification	3	0.045852	CTSK, COL1A1, MMP2	8.32937
GOTERM_BP_DIRECT	GO:0038063~collagen-activated tyrosine kinase receptor signaling pathway	3	0.045852	COL4A3, COL4A2, DDR2	8.32937
GOTERM_BP_DIRECT	GO:0042985~negative regulation of amyloid precursor protein biosynthetic process	3	0.045852	ABCA7, ITM2B, ITM2C	8.32937
GOTERM_BP_DIRECT	GO:0046931~pore complex assembly	3	0.045852	CCT8, CCT3, ANO6	8.32937
GOTERM_BP_DIRECT	GO:1902004~positive regulation of beta-amyloid formation	3	0.0616846	PICALM, APOE, CLU	7.13946
GOTERM_BP_DIRECT	GO:0033622~integrin activation	3	0.0616846	FERMT2, COL16A1, FN1	7.13946
GOTERM_BP_DIRECT	GO:1900121~negative regulation of receptor binding	3	0.0616846	PTPRF, ANXA2, B2M	7.13946
GOTERM_BP_DIRECT	GO:0043931~ossification involved in bone maturation	3	0.0616846	RHOA, RYR1, DCHS1	7.13946
GOTERM_BP_DIRECT	GO:0090091~positive regulation of extracellular matrix disassembly	3	0.0616846	FSCN1, CLASP1, DDR2	7.13946
GOTERM_BP_DIRECT	GO:0010886~positive regulation of cholesterol storage	3	0.0616846	APOB, CD36, EHD1	7.13946
GOTERM_BP_DIRECT	GO:0036089~cleavage furrow formation	3	0.0616846	SNX9, RHOA, SNX33	7.13946
GOTERM_BP_DIRECT	GO:0017121~phospholipid scrambling	3	0.0616846	PLSCR1, PLSCR3, ANO6	7.13946
GOTERM_BP_DIRECT	GO:0045822~negative regulation of heart contraction	3	0.0616846	ATP2A2, ATP1A1, ATP1A2	7.13946
GOTERM_BP_DIRECT	GO:0015808~L-alanine transport	3	0.0616846	SLC1A4, SLC36A1, SLC38A7	7.13946
GOTERM_BP_DIRECT	GO:0030042~actin filament depolymerization	3	0.07905	CFL1, MICAL3, DSTN	6.24702
GOTERM_BP_DIRECT	GO:0010544~negative regulation of platelet activation	3	0.07905	APOE, F2, PDGFRA	6.24702
GOTERM_BP_DIRECT	GO:0044829~positive regulation by host of viral genome replication	3	0.07905	STOM, PPIB, HSPA8	6.24702
GOTERM_BP_DIRECT	GO:0042698~ovulation cycle	3	0.07905	EGFR, SERPINF1, AXL	6.24702
GOTERM_BP_DIRECT	GO:0016584~nucleosome positioning	3	0.07905	HIST1H1E, HIST1H1D, HIST1H1C	6.24702
GOTERM_BP_DIRECT	GO:0051001~negative regulation of nitric-oxide synthase activity	3	0.07905	CAV1, ATP2B4, ENG	6.24702
GOTERM_BP_DIRECT	GO:0034383~low-density lipoprotein particle clearance	3	0.07905	APOB, CD36, EHD1	6.24702
GOTERM_BP_DIRECT	GO:0060371~regulation of atrial cardiac muscle cell membrane depolarization	3	0.07905	CACNA1G, GJA1, SCN10A	6.24702
GOTERM_BP_DIRECT	GO:0048261~negative regulation of receptor-mediated endocytosis	3	0.07905	PICALM, RAC1, ARF6	6.24702
GOTERM_BP_DIRECT	GO:0060100~positive regulation of phagocytosis, engulfment	3	0.07905	CD36, ITGA2, ANO6	6.24702
GOTERM_BP_DIRECT	GO:0090005~negative regulation of establishment of protein localization to plasma membrane	3	0.07905	TMEM59, TMBIM1, LRRC15	6.24702
GOTERM_BP_DIRECT	GO:2000643~positive regulation of early endosome to late endosome transport	3	0.07905	EZR, MSN, RAB21	6.24702
GOTERM_BP_DIRECT	GO:0098909~regulation of cardiac muscle cell action potential involved in regulation of contraction	3	0.07905	CAV1, ATP2A2, AKAP9	6.24702
GOTERM_BP_DIRECT	GO:0019852~L-ascorbic acid metabolic process	3	0.0977078	CYB5R3, SLC2A3, GSTO1	5.55291
GOTERM_BP_DIRECT	GO:0036500~ATF6-mediated unfolded protein response	3	0.0977078	HSP90B1, HSPA5, CALR	5.55291
GOTERM_BP_DIRECT	GO:0045198~establishment of epithelial cell apical/basal polarity	3	0.0977078	EZR, PTK7, MSN	5.55291
GOTERM_BP_DIRECT	GO:0090136~epithelial cell-cell adhesion	3	0.0977078	ITGB5, CTNNA1, VCL	5.55291
GOTERM_BP_DIRECT	GO:2000786~positive regulation of autophagosome assembly	3	0.0977078	RAB3GAP1, RALB, PIP4K2A	5.55291
GOTERM_BP_DIRECT	GO:0034405~response to fluid shear stress	3	0.0977078	P2RX4, PDGFRB, GJA1	5.55291
GOTERM_BP_DIRECT	GO:0006853~carnitine shuttle	3	0.0977078	PRKAB2, ACACA, CPT1A	5.55291
GOTERM_BP_DIRECT	GO:0032886~regulation of microtubule-based process	3	0.0977078	MACF1, DIAPH1, APC	5.55291
GOTERM_BP_DIRECT	GO:0007603~phototransduction, visible light	3	0.0977078	RP1, GNAQ, GNA11	5.55291
GOTERM_BP_DIRECT	GO:0034101~erythrocyte homeostasis	3	0.0977078	GPI, AXL, PRDX1	5.55291
GOTERM_BP_DIRECT	GO:0060627~regulation of vesicle-mediated transport	3	0.0977078	NRP1, RAB11A, VAMP2	5.55291
GOTERM_BP_DIRECT	GO:0035767~endothelial cell chemotaxis	3	0.0977078	CORO1B, NRP1, RAB13	5.55291
GOTERM_BP_DIRECT	GO:0035456~response to interferon-beta	3	0.0977078	PLSCR1, IFITM2, IFITM3	5.55291
GOTERM_BP_DIRECT	GO:0039694~viral RNA genome replication	3	0.0977078	RAB5A, PI4KA, EEA1	5.55291
GOTERM_BP_DIRECT	GO:1900027~regulation of ruffle assembly	3	0.0977078	CORO1C, CAV1, RHOG	5.55291
GOTERM_BP_DIRECT	GO:0086009~membrane repolarization	3	0.0977078	ATP1B3, ATP1A1, ATP1A2	5.55291
GOTERM_BP_DIRECT	GO:0032836~glomerular basement membrane development	3	0.0977078	COL4A4, COL4A3, NID1	5.55291
GOTERM_BP_DIRECT	GO:0009651~response to salt stress	3	0.0977078	HSP90AB1, ANXA7, HSP90AA1	5.55291
GOTERM_BP_DIRECT	GO:0034333~adherens junction assembly	3	0.0977078	JUP, CTNNB1, VCL	5.55291

## Sheet: GO_CC
Category	Term	Count	PValue	Gene Symbol	Fold Enrichment
GOTERM_CC_DIRECT	GO:0070062~extracellular exosome	568	1.25109e-203	LDHB, HIST2H2AA3, LDHA, A2M, TUBB2A, PGD, ITSN1, CTNNB1, B2M, ACTG1, HIST1H2BM, APP, HIST1H2BN, HIST1H2BL, VPS4B, VPS4A, RPL11, DDAH2, BSG, PTPRF, MYH9, THY1, ST13, JUP, NPC1, SERPINF1, RPS16, NME1, F2, RYR1, ARL8A, ARL8B, SH3GL2, GC, AHCY, GNAI3, GNAI2, ACP2, ARF6, SERPINH1, SCRIB, ALCAM, RPS25, PFN1, POTEI, PFN2, SYPL1, MYO15A, RAC1, EFR3A, POTEF, TUBB4A, TUBB4B, ACACA, GARS, HBA1, TINAGL1, RPS…	3.55101
GOTERM_CC_DIRECT	GO:0005737~cytoplasm	402	4.7056e-13	RP1, LDHB, HRAS, LDHA, TUBB2A, ZNF638, CTNNB1, B2M, HIST1H2BO, APP, HIST1H2BM, HIST1H2BN, DHX38, HIST1H2BK, HIST1H2BL, FAP, CUL9, HIST1H2BJ, ILK, VPS4B, VPS4A, RPL11, DDAH2, PLS3, LRRC7, YARS, MAGI2, MYH9, ST13, JUP, FAAP100, TAGLN, ASCC3, NME1, RYR1, ARL8A, ARL8B, SH3GL2, SH3GL1, DNAH10, AHCY, GNAI3, GNAI2, DNAH14, HSPA1A, HSPA1B, SCRIB, RPS25, PFN1, PFN2, MYO15A, MYO15B, RAC1, AHNAK2, IQSEC1, A…	1.35286
GOTERM_CC_DIRECT	GO:0005886~plasma membrane	362	8.15198e-21	SLC36A1, HRAS, ATP1B3, CCT3, LPAR1, ITSN1, CTNNB1, B2M, ATP2B1, ACTG1, CD47, APP, APOB, ATP2B4, DIRAS2, CD44, HTRA1, APOE, FAP, ILK, GRID2, RAB23, DYNC2H1, VPS4A, ISLR2, RECK, BSG, MAGI2, PTPRF, ABCB11, MDGA2, POLE, CTNNA1, MYH9, THY1, JUP, KRT19, CD36, F5, F2, RYR1, PDGFRA, RAB14, PDGFRB, ROR2, RAB13, ADGRA2, RAB10, SH3GL2, GNAI3, GNAI2, ERBB3, ITGA11, MME, ARF6, ATP12A, SCRIB, CD68, ACE, SERINC…	1.54373
GOTERM_CC_DIRECT	GO:0005829~cytosol	342	3.23453e-32	MOCOS, LDHB, LDHA, A2M, HRAS, PGD, CCT2, CCT3, ITSN1, RNF213, CTNNB1, ACTG1, APP, APOB, SERPINE2, VPS13C, HTRA1, ILK, DYNC2H1, VPS4B, VPS4A, CEP290, STAM, RPL11, DDAH2, FTL, YARS, RAN, AARS, MYH6, CTNNA1, MYH9, CEP152, FARP1, THY1, ST13, JUP, RPS16, NME1, RARS, KRT14, PGM1, RAB14, TUBA4A, KIF26A, SH3GL2, ALDOA, GC, KIF4B, AHCY, GNAI2, HSPA1A, HSPA1B, CALR, CAPZB, RPS25, HSPA1L, PFN1, TPI1, RAC1, …	1.81304
GOTERM_CC_DIRECT	GO:0016020~membrane	301	7.88497e-52	LDHB, LDHA, HRAS, SYNCRIP, RNF213, CTNNB1, B2M, ATP2B1, ACTG1, ATP2B4, PICALM, DHX38, APOE, ILK, CEP290, RPL11, FTL, RECK, BSG, ABCB11, RAN, AARS, UBR4, MED12, KRT10, MYH9, ALDH16A1, TMEM131, NPC1, CD36, RPS16, F5, NME1, LAMC3, ASCC3, PARP14, RARS, RYR1, PDGFRA, PDGFRB, LAMC2, ARL8A, ARL8B, ALDOA, GNAI3, GNAI2, ITGA11, BROX, ARF6, ACP2, CALR, CAPZB, COIL, PFN1, CD68, LGALS3BP, ACE, RAC1, IQSEC1, …	2.40441
GOTERM_CC_DIRECT	GO:0005615~extracellular space	165	1.13487e-21	VTN, CNP, POSTN, MMP2, B2M, ACTG1, APP, APOB, APOA1, SERPINE2, HIST1H2BK, PAPPA, APOE, HTRA1, FAP, TGFBI, HIST1H2BJ, APOH, COL12A1, PDGFD, RPS27A, EGFR, YARS, SOGA1, ACTN4, ACTN1, KRT10, MFGE8, CD36, F5, SERPINF1, F2, COL1A2, CSTB, SDCBP, LAMC2, COL1A1, LAMC1, TNFAIP2, UBA52, GC, ALDOA, ACTBL2, ERBB3, CLU, LRIG3, CALR, SERPINH1, ABI3BP, TIMP1, POTEI, LGALS3BP, ACE, TPI1, ALB, FGB, ANGPTL1, LAMB1,…	2.15269
GOTERM_CC_DIRECT	GO:0005925~focal adhesion	135	2.96081e-69	GNA13, MPZL1, TSPAN4, IQGAP1, B2M, VCL, CTNNB1, ACTG1, CD44, FAP, ILK, RRAS, RALA, SLC4A2, RAB21, EGFR, BSG, ACTN4, ACTN1, MYH9, CTNNA1, THY1, JUP, ARPC1B, RPS16, SDCBP, PDGFRB, PDCD6IP, RAB10, DST, CAV1, ITGA11, PTK7, MME, ITGB5, HSPA1A, ARF6, HSPA1B, ARPC5, ITGB3, NHS, CALR, ITGB1, ALCAM, PFN1, RPL7, ARPC2, ITGAV, RAC1, RPL5, CLASP1, RPL7A, SCARB2, P4HB, ITGA2, ITGA4, RPS8, CORO1C, CORO1B, SYNE…	6.06767
GOTERM_CC_DIRECT	GO:0005576~extracellular region	131	2.2737e-05	A2M, CAPZA1, VTN, TTN, MMP2, B2M, VCL, APP, APOB, LPA, APOA1, SERPINE2, PAPPA, APOE, HTRA1, TGFBI, APOH, COL12A1, PDGFD, ACTN4, DRAXIN, COL22A1, ACTN1, HLA-C, MFGE8, NPC1, F5, SERPINF1, LAMC3, F2, COL1A2, TUBA4A, LAMC2, LAMC1, COL1A1, GC, ALDOA, CLU, CALR, TIMP1, ACE, LGALS3BP, TUBB, LAMB2, HIST1H4A, ALB, VWA5B1, FGB, BCHE, LAMB1, PLTP, FN1, COL18A1, P4HB, EFEMP2, NDFIP1, HBA1, TINAGL1, EMILIN2, …	1.42992
GOTERM_CC_DIRECT	GO:0031012~extracellular matrix	105	7.76713e-55	VTN, POSTN, CCT2, EDIL3, MMP2, ACTG1, SERPINE2, HTRA1, APOE, TGFBI, ILK, APOH, RPN1, COL12A1, RPL11, RAN, MFGE8, EEF2, MYH9, JUP, RPS16, SERPINF1, COL1A2, LAMC1, COL1A1, MYL6, FRAS1, CLU, CALR, ABI3BP, RPS25, LGALS3BP, TUBB, LAMB2, HIST1H4A, RAC1, LAMB1, TUBB4B, FN1, COL18A1, P4HB, RAB8A, LGALS3, CKAP4, LGALS1, DDX5, EMILIN2, TINAGL1, EMILIN1, LAMA2, LAMA4, LAMA5, ARF4, HSPD1, PXDN, AEBP1, CLTC, …	6.23394
GOTERM_CC_DIRECT	GO:0005887~integral component of plasma membrane	99	0.023187	MPZL1, GABRB3, TSPAN4, TSPAN6, LPAR1, ATP2B1, CD47, APP, SLC16A1, ATP2B4, CD44, SLC2A3, SLC2A2, GRID2, SLC4A2, HLA-H, BSG, PTPRF, ABCB11, PLXNB2, HLA-A, MRGPRF, HLA-C, HLA-B, THY1, NPC1, CD36, PI4K2A, PDGFRA, RYR1, ROR2, VAMP2, CAV1, SLC38A2, ERBB3, PTK7, MME, ABCA1, ITGB3, ALCAM, SYPL1, ITGAV, PLXND1, GUCY2F, CD63, TPBG, KDR, EPHA3, LAMP1, P2RX4, SEMA6B, ATP13A1, ATP2A2, KCNH1, STEAP3, GJA1, ANP…	1.22954
GOTERM_CC_DIRECT	GO:0048471~perinuclear region of cytoplasm	92	3.3606e-17	KCNH1, HRAS, HIP1R, CNP, CTNNB1, LNPEP, APP, PICALM, PTGES, ARHGAP1, VPS4A, PUM2, MSN, EGFR, SEC23A, STX4, MAGI2, HSP90AA1, ACTN4, AIFM1, FLOT2, RAB4A, RAB4B, CLIC1, MCM3, FLNA, STOM, NPC1, GNB2, SERPINF1, ATP9B, NME1, IGF2R, VAMP7, RAB14, USP20, GNAS, LAMC2, VAMP2, MVP, CAV1, RAB3C, APC2, CLU, HSPA1A, HSPA1B, ABCA1, CALR, ITM2C, ITGB1, RACK1, ANXA6, SERINC5, EZR, ECE1, SORBS2, FAT1, PIKFYVE, DNA…	2.60352
GOTERM_CC_DIRECT	GO:0005794~Golgi apparatus	90	2.99213e-08	HRAS, RAB3GAP1, GJA1, RAB1B, TMF1, B2M, SLC1A5, APP, APOB, PICALM, CD44, EVI5, APOE, ANK3, COPB1, DYNC2H1, ATP8B2, SAR1B, GOLGA4, SAR1A, CDK13, ATP8B4, TRPM4, CLN3, ADAM10, HLA-A, HLA-C, HLA-B, MAN1A1, CTNNA1, HERC1, NPC1, CD36, ASCC3, VAMP7, PI4K2A, RAB14, CAND1, RUVBL1, PTGFRN, RAB13, COL1A1, RAB10, PRNP, SLC39A14, RAB7A, ABCA7, GNAI3, APC2, SNX17, CLU, ARF6, STIP1, AKAP9, ABCA1, ITM2B, CALR, I…	1.83272
GOTERM_CC_DIRECT	GO:0005739~mitochondrion	88	0.0911955	CYB5R3, HSP90AB1, LDHB, SLC44A1, NARS, AGTPBP1, HIP1R, PRDX4, TP63, RAB1B, GJA1, CLTC, MMP2, PRDX1, PKM, TBC1D15, SLC16A1, FSIP2, DDAH2, BRD8, VASN, CLN3, BSG, LDHAL6B, AIFM1, AARS, STXBP1, CLIC1, SLIT3, STOM, LAP3, ATP6V1A, RARS, PI4K2A, TXN, TXNRD1, UBB, PRNP, ADAM12, GSTP1, YWHAZ, CLU, ADH5, HCFC1, HSPA1A, HSPA1B, FTH1, RACK1, ANXA6, KRT5, HSPA2, ATIC, FASN, RAB11B, DNAJA1, PPP3CC, RAB11A, IDH…	1.1619
GOTERM_CC_DIRECT	GO:0005913~cell-cell adherens junction	81	3.75369e-30	RTN4, HSP90AB1, LDHA, TLN1, CHMP4B, CAPZA1, PRDX1, IQGAP1, CTNNB1, VCL, PKM, PICALM, ARHGAP1, FAM129B, DLG5, AHNAK, EGFR, VASN, BSG, RAN, FLOT2, FLOT1, SLC3A2, PI4KA, PFKP, EEF2, CLIC1, CTNNA1, MYH9, FLNB, FLNA, JUP, EVPL, PRDX6, RARS, EEF1G, SDCBP, RUVBL1, RAB10, SH3GL1, ALDOA, SNX9, YWHAZ, HCFC1, HSPA1A, HSPA1B, TAGLN2, CAPZB, ITGB1, SCRIB, RACK1, PFN1, EZR, MACF1, ATIC, FAT2, PLIN3, RAB11B, FA…	4.40704
GOTERM_CC_DIRECT	GO:0009986~cell surface	77	2.23847e-13	KCNH1, HSP90AB1, MPZL1, TLN1, NRP1, PDIA3, FERMT2, LPAR1, SDC3, SLC1A4, DIP2A, APP, APOA1, SRPX, CD44, ANK3, FAP, APOH, RALA, LTF, ANO6, NT5E, DPP4, ISLR2, EGFR, CIITA, VASN, HLA-H, STX4, ADAM10, HSP90AA1, PLXNB2, HLA-A, SLC3A2, HLA-C, HLA-B, CD36, IGF2R, VAMP7, NPTN, PDGFRB, PTGFRN, ADGRA2, PRNP, ABCA7, CLU, CD109, ITGB5, ITGB3, GPRC5B, CALR, ITGB1, MIF, HSPA2, FGB, ITGAV, KRT4, HSPA5, LGALS1, T…	2.49664
GOTERM_CC_DIRECT	GO:0005765~lysosomal membrane	66	1.3938e-23	HSP90AB1, HGSNAT, SLC36A1, SLC44A2, AP1B1, RAB5C, GNA11, TLDC1, ANPEP, LNPEP, TMEM59, ATP6V0D1, DPP4, AHNAK, VASN, CLN3, FLOT1, ATP6V1A, NPC1, GNB2, GNAQ, GNB1, VAMP7, IGF2R, PI4K2A, RAB14, UBC, GNB4, ARL8A, ARL8B, UBA52, RAB7A, AP1M1, GNAI3, IFITM3, TMEM63A, CTSA, ABCA2, ACP2, ATP6V1B2, ITM2C, ABCA5, ANXA6, CD68, ECE1, COL6A1, SCARB2, HSPA8, RAB2A, TCIRG1, LAMTOR1, PSAP, SLC12A4, TMBIM1, CD63, T…	4.2331
GOTERM_CC_DIRECT	GO:0005783~endoplasmic reticulum	65	0.00760924	RTN4, CYB5R3, SLC36A1, PXDN, PDIA3, CRABP2, PDIA6, SYNCRIP, CANX, TMF1, SRPX, ANK3, APOE, POMT1, RPN2, SAR1B, DDOST, SAR1A, IFNGR1, SEC23A, TRPM4, CLN3, HLA-A, HLA-C, HLA-B, MAN1A1, HNRNPR, THY1, UFL1, STOM, NPC1, TXNDC5, CEMIP, EEF1G, PRNP, SLC39A14, CAV1, PANX1, CLU, CTSA, CALR, SERPINH1, ALB, SLC30A1, SQSTM1, HSPA5, EHD4, COL4A3, P4HB, OSBPL8, CKAP4, NDFIP2, ATP1A1, TPBG, KDR, NCSTN, HSP90B1, …	1.37958
GOTERM_CC_DIRECT	GO:0043209~myelin sheath	64	1.68696e-38	LDHB, GFAP, PDIA3, CCT2, CCT3, CLTC, PRDX1, CANX, PKM, ACTG1, ACTR1A, RALA, MSN, TUBA1A, TUBA1B, RPS27A, HSP90AA1, STXBP1, THY1, ATP6V1A, GNB2, GNB1, GNB4, PDCD6IP, ARF6, STIP1, CLDN11, ATP6V1B2, MIF, SERINC5, EZR, HSPA2, ALB, ENO2, HSPA5, EHD1, HSPA8, TUBB4A, HSPA9, TUBB4B, ACTB, DLST, GDI2, TCP1, MPZ, MYO1D, FSCN1, TKT, ATP1A1, DPYSL2, DLAT, ATP1A2, VDAC1, SOD2, GPI, YWHAG, CCT5, VCP, PHGDH, RA…	7.39948
GOTERM_CC_DIRECT	GO:0043231~intracellular membrane-bounded organelle	58	1.29684e-05	HRAS, RAB5C, HIP1R, MITD1, ZNF638, CLTC, ATP2B1, AP2B1, APOB, APP, ATP2B4, PEX1, EVI5, COPB1, DDOST, GOLGA4, SCAMP3, ADAM10, ATP4A, RAB4A, CTNNA1, MCM3, G6PD, PSMA4, VAMP7, RAB14, VCAN, VAMP2, RUVBL1, RAB7A, ABCA7, SNX17, AKAP9, CTSA, ATP6V1B2, GPRC5B, ATP12A, ITM2B, ABCA5, RRAGC, PLIN3, GAPDH, MYOF, TNRC6A, COL4A3, COL4A2, LAMTOR1, NDFIP2, ATP1A1, ATP1A2, ATP13A1, TFRC, CADPS2, VCP, PSMC2, TMEM1…	1.82666
GOTERM_CC_DIRECT	GO:0042470~melanosome	55	1.74217e-40	GNA13, HSP90AB1, ATP1B3, RAB5B, PDIA3, RAB5C, NAP1L1, PDIA6, CNP, CLTC, PRDX1, CANX, SLC1A4, SLC1A5, RPN1, BSG, HSP90AA1, RAN, FLOT1, SLC3A2, MMP14, ANXA2P2, STOM, SERPINF1, RAB5A, CTSD, SDCBP, PDCD6IP, YWHAZ, AHCY, ATP6V1B2, ITGB3, ITGB1, ANXA6, SYPL1, RAC1, FASN, HSPA5, GPNMB, HSPA8, RAB2A, P4HB, YWHAB, ATP1A1, CD63, YWHAE, ANXA2, NCSTN, LAMP1, HSP90B1, CCT4, TFRC, PPIB, RAB35, ANXA11	9.56988
GOTERM_CC_DIRECT	GO:0000139~Golgi membrane	48	0.0126944	ABCA7, COPA, CAV1, HRAS, AP1M1, AP1B1, GJA1, RAB1B, ITM2B, ABCA5, B2M, TMF1, GLIPR2, COL7A1, TMEM59, COPB1, RAC1, PIKFYVE, DOPEY2, PDGFD, GOLGA4, SEC23A, EGFR, RAB2A, CLN3, HLA-H, SCAMP3, BSG, RAB8A, ADAM10, HLA-A, NDFIP1, NDFIP2, HLA-C, MAN1A1, HLA-B, HLA-G, NOTCH3, NRAS, F5, ARF1, CD59, ARF3, RAB35, RAB14, RAB10, SH3GL2, GOLGB1	1.42731
GOTERM_CC_DIRECT	GO:0043234~protein complex	47	9.46751e-06	CEP97, CAV1, PANX1, RAB3GAP1, SNX17, CLU, TP63, STIP1, CLTC, CANX, IQGAP1, CTNNB1, VCL, TUBB, ATP2B4, HIST1H4A, ALB, ILK, COL6A2, LTF, COL6A1, CEP290, SNTB2, RAB11A, DDOST, ACTB, HSP90AA1, MAGI2, ACTN4, CKAP5, ANXA1, YWHAB, STXBP1, ATP1A1, DPYSL2, MYH9, ST13, UBE2N, UFL1, ATP2A2, GNB2, NEB, PI4K2A, YWHAQ, PDGFRA, HSPD1, RBM17	2.00477
GOTERM_CC_DIRECT	GO:0005768~endosome	46	9.80167e-14	SNX9, CAV1, RAB5B, TSG101, CHMP4B, SNX17, ARF6, ABCA2, LPAR1, ACE, APP, EZR, ECE1, ARPC2, PLIN3, VPS4B, RHOA, VPS4A, DOPEY2, RAB21, EGFR, STX4, FLT1, RAB4A, FLOT2, MYO1D, FLOT1, ANXA1, BIRC6, ATP1A1, ATP1A2, ANXA2, KDR, LRP1, TFRC, ATP9B, FYN, IGF2R, PI4K2A, RAB5A, TOM1, CLIP1, SNX33, RAB10, VPS28, PDCD6	3.59286
GOTERM_CC_DIRECT	GO:0005813~centrosome	45	9.54035e-05	CEP97, CEP120, GNAI3, GNAI2, CCDC187, AKAP9, TTC28, FBF1, CTNNB1, OFD1, PSMB5, SLC1A4, SLC16A1, ACTR1A, ACTR1B, VPS4B, CEP290, RAB11A, VPS4A, CLASP1, DDAH2, DYNC1H1, ATP6V0D1, APC, CKAP2, RAB8A, TCP1, C2CD3, CEP135, CKAP5, UBR4, MED12, MCM3, CEP152, ANKRD26, CCT5, CCT4, G6PD, NME1, IST1, CCT8, USP20, CLIP1, MARCKS, MAP7D3	1.85638
GOTERM_CC_DIRECT	GO:0072562~blood microparticle	44	3.98669e-19	GC, YWHAZ, A2M, C9, PZP, C3, CLU, PRSS1, VTN, HSPA1A, C1R, HSPA1B, HSPA1L, ACTG1, PFN1, LGALS3BP, APOA1, HSPA2, BCHE, APOE, GSN, ALB, FGB, HSPA6, KRT1, SERPINC1, ITIH2, MSN, POTEF, HBB, HSPA8, FN1, ACTB, ACTC1, ACTA1, C4BPA, HBA1, CLIC1, STOM, TFRC, F2, SDCBP, HBG2, HBE1	5.08714
GOTERM_CC_DIRECT	GO:0015629~actin cytoskeleton	44	5.72848e-13	ALDOA, TRIOBP, TLN2, CAPZA1, KNTC1, ARPC5, CAPZB, IQGAP1, DSTN, VCL, ACTR3, ACTR2, APOB, EZR, SORBS2, ARPC2, GSN, FAM129B, AHNAK, ACTA1, ACTN4, FSCN1, ACACA, CORO6, CTNNA1, MYH9, FLNB, FLNA, NOTCH3, JUP, CORO1C, CORO1B, ARPC1B, NEB, CFL1, RAB22A, PGM1, RAB5A, MARCKS, SPTA1, ABL1, DST, MAP7D3, LCP1	3.547
GOTERM_CC_DIRECT	GO:0005874~microtubule	43	1.65628e-07	KIF22, RP1, KIF4B, DNAH10, APC2, DNAH14, TUBB2A, CNP, CCT2, CCT3, DNAH2, IQGAP1, DNAH5, TUBB, MACF1, TIAM1, DYNC2H1, TUBB6, SNTB2, TUBA1A, TUBB1, KIF21A, DYNC1H1, TUBA1B, TUBA1C, TUBB4A, TUBB3, APC, TUBB4B, SLC8A1, TCP1, CCT6A, DPYSL2, EML4, CCT7, CCT5, KIF1A, CCT4, CCT8, CLIP1, TUBA4A, KIF26A, KIF26B	2.42981
GOTERM_CC_DIRECT	GO:0005856~cytoskeleton	43	1.64216e-05	ACTBL2, HIP1R, VIM, CAPZA1, FERMT2, AKAP9, CCT3, CAPZB, VCL, ACTG1, PFN1, TUBB, PFN2, EZR, MACF1, MYO15A, MYO15B, KRT1, RHOA, MSN, PLEC, TUBB4B, ACTB, PPP1R18, TTC21B, CKAP4, FSCN1, MICAL3, BASP1, DPYSL2, FLNC, FARP1, JUP, STOM, EPB41L3, MAST1, EVPL, KRT16, JAK1, SDCBP, SGCD, DST, MVP	2.03685
GOTERM_CC_DIRECT	GO:0045121~membrane raft	42	1.46134e-12	LDHB, CAV1, GNAI3, GNAI2, GJA1, ABCA1, GPRC5B, ITGB1, SERPINH1, IQGAP1, VCL, ATP2B1, APP, PIKFYVE, DPP4, AHNAK, RAP2B, EGFR, CLN3, BSG, MYO1C, LAMTOR1, FLOT1, EEF2, MYADM, ANXA2, KDR, VDAC1, THY1, STOM, PLSCR1, NPC1, CD36, FYN, PI4K2A, RAB5A, CTSD, SDCBP, RAP1B, HSPD1, PGK1, PRNP	3.583
GOTERM_CC_DIRECT	GO:0016324~apical plasma membrane	37	9.53255e-06	HSP90AB1, ABCA7, CAV1, ERBB3, GJA1, NHS, DDR2, ATP2B1, CD9, EZR, AKR1A1, SORBS2, SLC2A2, SLC4A7, SLC4A2, MSN, ATP6V0D1, DPP4, FN1, EGFR, TCIRG1, MYO1A, HSP90AA1, FLOT2, FLOT1, ANXA1, SLC3A2, STXBP2, STXBP3, ATP1A1, THY1, ATP6V1A, CD36, AP2A1, PDGFRB, GNAS, ABCC2	2.23447
GOTERM_CC_DIRECT	GO:0005788~endoplasmic reticulum lumen	36	7.83262e-10	PDIA3, PDIA6, COL2A1, CALR, CANX, SERPINH1, B2M, APOB, APOA1, COL7A1, BCHE, COL27A1, COL6A3, COL6A2, COL6A1, COL12A1, HSPA5, PDGFD, COL18A1, COL4A4, P4HB, COL4A3, COL4A2, COL22A1, COL15A1, COL5A3, COL16A1, COL5A2, HSP90B1, COL19A1, F5, PPIB, TXNDC5, F2, COL1A2, COL1A1	3.29508
GOTERM_CC_DIRECT	GO:0031982~vesicle	35	1.86045e-14	MYL6, RAB3C, CHMP4B, TSPAN4, TAGLN2, MIF, PKM, EZR, PICALM, ECE1, RHOA, RAB11A, MSN, GAPDH, TUBA1C, AHNAK, IFNGR1, GDI2, FLOT2, RAB4A, ANXA1, TKT, BASP1, CLIC1, ANXA2, CORO1C, STOM, GNB2, CD59, CFL1, CD81, VAMP2, SPNS1, GSTP1, MUC16	4.80533
GOTERM_CC_DIRECT	GO:0043025~neuronal cell body	35	0.000257427	KCNH1, SLC38A2, NRP1, HIP1R, SLC38A7, HCFC1, AKAP9, LPAR1, CANX, SLC1A4, RACK1, ALCAM, APOB, PICALM, TIAM1, APOE, ILK, TUBB3, TUBB4A, TRPM4, RAB8A, TRPM5, HSP90AA1, PTPRF, SPTBN4, MYO1D, DPYSL2, FLNA, P2RX4, LAMP1, LRP1, PI4K2A, RAB5A, UBB, ABL1	1.95264
GOTERM_CC_DIRECT	GO:0030054~cell junction	34	0.0983545	ABCA7, NAMPT, GABRB3, ITSN1, SCRIB, FBF1, CTNNB1, SLX4, ILK, RHOA, RAB11B, GRID2, CDK16, LRRC7, GRID1, RIMBP2, SDK1, BASP1, CTNNA1, FARP1, SEPT11, KDR, CADPS, P2RX4, TMEM47, CADPS2, XIRP1, XIRP2, VAMP7, PI4K2A, RAP1A, CPNE3, VAMP2, IGSF9	1.30176
GOTERM_CC_DIRECT	GO:0030027~lamellipodium	33	3.66188e-10	SLC39A14, NHS, ITSN1, CAPZB, ITGB1, SCRIB, CTNNB1, ACTR3, SORBS2, FAT1, FAP, RAC1, ILK, RHOA, PLXND1, DPP4, APC, STX4, ACTC1, ACTA1, FLOT2, FSCN1, FLOT1, DPYSL3, CTNNA1, CORO1C, ARHGAP31, CORO1B, VAMP7, AMOT, CYFIP1, RAB13, APBB2	3.62459
GOTERM_CC_DIRECT	GO:0010008~endosome membrane	33	1.56026e-08	STEAP3, RAB7A, TSG101, SNX17, ABCA2, ITM2B, CD68, APOB, PIKFYVE, PLIN3, RAB23, VPS4B, EHD1, ATP6V0D1, EHD2, RPS27A, TCIRG1, EGFR, MYO1B, NDFIP1, TMBIM1, CD63, LAMP1, UBA1, RAB35, RAB22A, TMEM165, UBC, RAB5A, ANTXR2, UBB, VPS28, UBA52	3.13478
GOTERM_CC_DIRECT	GO:0030425~dendrite	33	0.00287902	KCNH1, SLC38A2, GNAI2, MME, TP63, HCFC1, SLC1A4, RACK1, ALCAM, ANK3, APOE, IFNGR1, TUBB3, RAB8A, TRPM5, MAGI2, NF1, SACS, DPYSL2, ARHGEF15, RPS6, HNRNPR, FARP1, THY1, LAMP1, LRP1, GNAQ, GNB1, PI4K2A, RAB5A, NPTN, GNAS, IGSF9	1.73115
GOTERM_CC_DIRECT	GO:0005604~basement membrane	32	9.2673e-19	FRAS1, TNC, VTN, COL2A1, CD151, TIMP1, LAMB2, COL7A1, TGFBI, LOXL2, LAMB1, THBS2, COL18A1, COL4A3, EFEMP2, FBN1, HSPG2, CCDC80, NID1, NID2, SMC3, ANXA2, ANXA2P2, LAMA2, LAMA4, FBLN1, LAMA3, SERPINF1, LAMA5, LAMC3, LAMC1, DST	7.11849
GOTERM_CC_DIRECT	GO:0005769~early endosome	32	6.39297e-06	NRP1, RAB5B, RAB5C, TSG101, SNX17, GJA1, EEA1, ARF6, SAMD9L, APOB, ECE1, APOA1, APOE, VPS4A, EHD1, ATP6V0D1, CLN3, MYO1B, FLOT1, KDR, ANXA2, EPHA3, IGF2R, PTP4A1, RAB22A, PTP4A2, RAB14, RAB5A, RAP1A, TOM1, HSPD1, VPS28	2.45572
GOTERM_CC_DIRECT	GO:0005911~cell-cell junction	31	3.59401e-08	TLN1, TLN2, PTK7, KIT, SCRIB, IQGAP1, CTNNB1, VCL, ACTR3, APP, TIAM1, FAT1, SLC2A2, PIKFYVE, ILK, ACTN4, FLOT1, FSCN1, ACTN1, CTNNA1, MYADM, FLNA, ANXA2, JUP, EPB41L3, TMEM47, ITGA5, RAP1B, WDR1, RAB10, PDZD2	3.16737
GOTERM_CC_DIRECT	GO:0005578~proteinaceous extracellular matrix	31	0.000309904	PXDN, POSTN, CALR, MMP2, TIMP1, GPC4, LGALS3BP, GPC6, TGFBI, COL6A3, COL6A2, FN1, COL18A1, COL4A4, COL4A3, TNXB, LGALS1, FBN1, COL22A1, COL15A1, EMILIN2, COL16A1, COL5A2, EMILIN1, SLIT3, FBLN1, COL19A1, FBLN2, LAMC3, COL1A2, VCAN	2.03279
GOTERM_CC_DIRECT	GO:0031410~cytoplasmic vesicle	29	0.000172694	SNX9, CAV1, NRP1, SNX17, ABCA2, EEA1, APOA1, SQSTM1, PIKFYVE, CEP290, SLC4A7, RAB11A, MYOF, MYO1C, FLOT2, FLOT1, MYO1D, MMP14, TFRC, ITGA5, PRDX6, IST1, PI4K2A, PDGFRB, VAMP2, SNX33, RAB13, DST, PDCD6	2.16868
GOTERM_CC_DIRECT	GO:0030659~cytoplasmic vesicle membrane	28	1.76335e-09	SNX9, YWHAZ, AP1M1, AP1B1, SNX17, LRIG3, GPRC5B, LNPEP, TBC1D4, RAB11A, RALA, AHNAK2, MYOF, RAB21, RAB8A, ANXA1, YWHAB, YWHAE, CADPS, YWHAG, YWHAH, CADPS2, YWHAQ, RAB14, CLIP1, SNX33, RAB13, RAB10	3.90528
GOTERM_CC_DIRECT	GO:0016323~basolateral plasma membrane	28	3.63077e-06	HSP90AB1, CAV1, ERBB3, ATP12A, SCRIB, CTNNB1, ATP2B1, EZR, ATP2B4, ANK3, SLC4A7, SLC4A2, MSN, EGFR, STX4, MYO1A, HSP90AA1, MPZ, FLOT2, FLOT1, MYO1D, ANXA1, STXBP3, ATP1A1, ANXA2, TFRC, AP2A1, ABCC1	2.7337
GOTERM_CC_DIRECT	GO:0000786~nucleosome	27	8.10967e-12	HIST1H2AB, HIST2H2AA3, HIST1H2AC, HIST1H2AA, HIST1H2AG, HIST1H2AD, HIST1H2BO, HIST2H2AB, HIST1H2BM, HIST1H2BN, HIST1H2BK, HIST1H4A, HIST1H2BL, HIST2H2AC, HIST1H2BJ, H2AFX, HIST1H2BB, HIST1H2BC, HIST1H1E, HIST1H1D, HIST1H2BD, HIST1H1C, HIST1H2BH, H2AFJ, HIST2H2BE, HIST1H2AH, HIST1H2AJ	5.04779
GOTERM_CC_DIRECT	GO:0009897~external side of plasma membrane	27	0.000197246	ANPEP, KIT, ABCA1, CALR, ITGB1, B2M, ALCAM, GPC4, CD9, ACE, ECE1, FGB, ITGAV, P4HB, CD276, ITGA2, MFGE8, ANXA5, THY1, CDH13, LAMP1, CD36, TFRC, ITGA5, AMOT, ANTXR2, ENG	2.22766
GOTERM_CC_DIRECT	GO:0005764~lysosome	27	0.000500556	RAB7A, GFAP, GJA1, ABCA2, ACP2, CTSA, ITM2C, ABCA5, RRAGC, ACE, ANK3, TMEM59, VPS4A, SCARB2, CLN3, MPZ, LAMTOR1, PSAP, CD63, TINAGL1, LAMP1, NPC1, LAMP2, CTSK, PRDX6, RAB14, CTSD	2.09952
GOTERM_CC_DIRECT	GO:0043005~neuron projection	27	0.00102105	AHCY, VIM, ARPC5, ITSN1, IQGAP1, PFN1, ATP2B4, ARPC2, ANK3, CDK16, CLN3, HSP90AA1, ACTN4, PTPRF, CPNE5, MYO1D, UFL1, CDH13, GPI, ARF1, VAMP7, PI4K2A, CYFIP1, RAP1A, VAMP2, UBB, RAB13	2.00208
GOTERM_CC_DIRECT	GO:1903561~extracellular vesicle	26	1.69472e-18	GNAI2, TUBB2A, EDIL3, CLTC, VCL, PKM, CD9, CBR1, APOA1, SERPINE2, APOE, FGB, COL6A3, COL6A2, COL12A1, TUBB4B, EFEMP2, ATP1A1, MFGE8, ATP1A2, F5, TFRC, FBLN2, GNB1, SDCBP, PDCD6IP	9.13836
GOTERM_CC_DIRECT	GO:0005882~intermediate filament	26	3.49805e-09	KRT6C, GFAP, VIM, GJA1, KRT9, SLC1A4, KRT27, KRT80, KRT5, KRT2, KRT3, KRT4, NCKIPSD, LMNA, KRT13, KRT10, JUP, KRT19, KRT17, NME1, KRT16, KRT79, KRT15, KRT14, CLIP1, DST	4.04352
GOTERM_CC_DIRECT	GO:0031902~late endosome membrane	24	8.18374e-09	RAB7A, LAMTOR1, CHMP4B, TSG101, IFITM3, MITD1, CD63, TMEM55B, ANXA2, TMEM55A, ABCA5, ANXA6, LAMP2, NPC1, TMEM59, VAMP7, PIKFYVE, TMEM165, VPS4B, VPS4A, ARL8A, ARL8B, SCARB2, VPS28	4.17595
GOTERM_CC_DIRECT	GO:0031901~early endosome membrane	24	1.27352e-07	KCNH1, EGFR, ABCA7, HLA-H, CAV1, RAB5B, RAB5C, ANXA1, PML, HLA-A, HLA-C, EEA1, HLA-B, HLA-G, B2M, PI4K2A, TMEM165, RAC1, PIKFYVE, RAB14, STAM, EHD1, SH3GL1, EHD4	3.63595
GOTERM_CC_DIRECT	GO:0030018~Z disc	24	1.76576e-07	OBSCN, SLC8A1, ACTN4, ACTN1, MYH6, TTN, FLNC, CAPZB, FLNB, FLNA, CTNNB1, JUP, KRT19, ATP2B4, SYNE2, NEB, XIRP2, SORBS2, ANK3, RYR1, AHNAK2, CACNA1C, CACNA1D, DST	3.57433
GOTERM_CC_DIRECT	GO:0042383~sarcolemma	23	1.31349e-09	SLC8A1, BSG, SLC38A2, FLOT1, ANXA1, ATP1A1, FLNC, ITGB1, ANXA2, LAMA2, LAMP1, ABCC9, KRT19, ANK3, CD59, COL6A3, COL6A2, RYR1, COL6A1, AHNAK2, SGCD, AHNAK, PLEC	4.75526
GOTERM_CC_DIRECT	GO:0001726~ruffle	23	4.21701e-09	SNX9, TLN1, TLN2, FSCN1, S100A11, ACTN1, ARF6, ATP6V1B2, MYH9, MYADM, ITGB1, IQGAP1, ANXA2, EZR, ITGA5, RAB22A, RAB5A, CLIP1, AMOT, CYFIP1, GNAS, ABL1, LCP1	4.49107
GOTERM_CC_DIRECT	GO:0030496~midbody	23	3.42569e-06	TRIOBP, GNAI3, GNAI2, RAN, CHMP4B, BIRC6, ARF6, TTC28, MITD1, IQGAP1, ANXA2, RACK1, HSP90B1, IST1, ANXA11, RHOA, RALB, VPS4A, RALA, ARL8A, ARL8B, HSPA5, ASPM	3.13331
GOTERM_CC_DIRECT	GO:0005802~trans-Golgi network	23	8.31342e-06	SNX9, CLN3, STX4, BIRC6, NBEA, POSTN, SOD3, LAP3, AP2B1, ARF1, ATP9B, IGF2R, VAMP7, RAC1, TGFBI, RAB14, RAB11A, DOPEY2, RAB13, VAMP2, RAB10, GOLGA4, RAB21	2.97203
GOTERM_CC_DIRECT	GO:0045202~synapse	23	0.000627815	EGFR, STX4, MAGI2, GABRB3, TLN2, RIMBP2, SDK1, MME, ITSN1, PFN1, APP, LAMB2, ARPC2, ITGA5, VAMP7, GRID2, SNTB2, SLC4A7, CYFIP1, VAMP2, ABL1, APBB2, SH3GL2	2.23313
GOTERM_CC_DIRECT	GO:0000790~nuclear chromatin	23	0.00147415	ACTB, HIST1H2AB, KAT2A, HIST2H2AA3, HIST1H2AC, HIST1H1D, HIST1H2AA, HIST1H2AG, TTC21B, HIST1H2AD, TP63, H2AFJ, TCF7L2, HIST2H2AB, SLX4, UHRF1, TIMELESS, HIST2H2AC, HIST1H2AH, H2AFX, HIST1H2AJ, NCOR1, RUNX3	2.09428
GOTERM_CC_DIRECT	GO:0030424~axon	23	0.00804491	NRP1, SLC38A2, SLC38A7, NF1, MYO1D, GARS, SACS, MME, HCFC1, CANX, YWHAE, IQGAP1, SEPT11, SETX, ALCAM, APP, RAB5A, RAB11A, MYH14, SPTA1, DST, IGSF9, TUBB3	1.82071
GOTERM_CC_DIRECT	GO:0032587~ruffle membrane	22	3.82852e-09	ARHGEF4, ABCA7, EEF1A1, TLN1, HSP90AA1, MYO1C, HIP1R, DIAPH1, ITGB3, ITGB1, EZR, MACF1, NME1, ITGA5, TIAM1, ITGAV, FAP, CFL1, RAC1, ARF4, LCP1, APC	4.71491
GOTERM_CC_DIRECT	GO:0005581~collagen trimer	22	3.47076e-08	COL4A4, COL18A1, COL4A3, COL22A1, COL15A1, COL2A1, EMILIN2, SERPINH1, COL5A2, PCOLCE, TIMP1, EMILIN1, COL19A1, CD36, COL7A1, COL27A1, COL6A3, COL1A2, COL6A2, COL12A1, COL6A1, COL1A1	4.20242
GOTERM_CC_DIRECT	GO:0005903~brush border	20	4.10393e-10	MYL6, MYO1A, SLC38A2, ACTN4, MYO1C, MYO1B, MYO1D, MME, ACTN1, CLIC1, MYH9, FLNB, CAPZB, VCL, ACTR3, EZR, SLC2A2, MYO15B, MYH14, PLEC	5.85792
GOTERM_CC_DIRECT	GO:0044297~cell body	19	7.52005e-09	GFAP, ACTC1, TCP1, ACTA1, GNAI2, CCT2, DPYSL3, CCT3, RPS6, HSPA1L, CCT7, TUBB, CCT5, CCT4, EZR, GNAQ, GNB2, GNB1, CCT8	5.30003
GOTERM_CC_DIRECT	GO:0030670~phagocytic vesicle membrane	18	1.70456e-08	TCIRG1, HLA-H, RAB7A, RAB8A, RAB8B, HLA-A, HLA-C, HLA-B, HLA-G, B2M, LAMP2, VAMP7, RAB22A, RAB23, RAB11B, RAB5A, ATP6V0D1, RAB10	5.36149
GOTERM_CC_DIRECT	GO:0043202~lysosomal lumen	18	4.83699e-06	GC, HSP90AA1, PSAP, HEXA, HSPG2, CTSA, ACP2, DCN, SDC3, GPC4, LAMP2, TXNDC5, GPC6, PDGFRB, CTSD, VCAN, SCARB2, HSPA8	3.7215
GOTERM_CC_DIRECT	GO:0005884~actin filament	17	4.91222e-07	ACTC1, ACTA1, APC2, MYO1B, ACTN1, CAPZB, IQGAP1, FLNA, CORO1B, EZR, FYN, RAC1, AMOT, WDR1, YES1, LCP1, PLS3	4.59622
GOTERM_CC_DIRECT	GO:0005770~late endosome	17	0.00149379	RAB7A, CLN3, MAGI2, TSG101, CD63, ABCA5, LAMP1, LAMP2, ARF1, TMEM59, SQSTM1, IGF2R, RAB22A, RAB14, VPS4A, RAP1A, HSPA8	2.4488
GOTERM_CC_DIRECT	GO:0030529~intracellular ribonucleoprotein complex	17	0.00453159	ACTB, ACTN4, HNRNPA2B1, SYNCRIP, EEF2, RPS4X, DDX5, RPS6, HNRNPR, IQGAP1, RPS8, RPL7, RPL5, PARP4, GAPDH, HSPA8, MVP	2.19672
GOTERM_CC_DIRECT	GO:0005815~microtubule organizing center	17	0.0135947	CEP97, TRIOBP, TLN1, DIAPH1, SPECC1, DLGAP5, FLOT1, BIRC6, ABCA2, CEP152, SLC1A4, G6PD, EVI5, RAB11B, PDCD6IP, RUVBL1, YES1	1.95264
GOTERM_CC_DIRECT	GO:0030139~endocytic vesicle	16	2.01802e-07	EGFR, RAB5B, RAB5C, FLOT2, ARF6, LPAR1, ABCA1, ITSN1, APOA1, IGF2R, RAB5A, AMOT, RALA, RAB13, EHD1, DPP4	5.20704
GOTERM_CC_DIRECT	GO:0005938~cell cortex	16	0.00419963	CAV1, FERMT2, NDFIP1, ARF6, FLNB, ANXA2, CTNNB1, PFN1, FGB, RYR1, RHOA, MARCKS, LAMC2, CLASP1, DST, POTEF	2.28602
GOTERM_CC_DIRECT	GO:0015630~microtubule cytoskeleton	16	0.0111796	CKAP2, APC2, CKAP5, IQGAP1, EML4, OFD1, MAST2, TIMELESS, ACTR1A, ACTR1B, CLIP1, CCSER2, CDK16, GAPDH, DST, MAP7D3	2.05241
GOTERM_CC_DIRECT	GO:0005635~nuclear envelope	16	0.0373563	WDFY3, RTN4, CHMP4B, LMNA, NUP188, CLIC1, ANXA7, NPC1, SYNE2, NUP210, IST1, ANXA11, CLIP1, MYOF, DST, KPNB1	1.76843
GOTERM_CC_DIRECT	GO:0045335~phagocytic vesicle	15	1.33582e-08	RAB7A, RAB8A, RAB8B, ITGB5, ABCA1, CD36, ITGAV, VAMP7, ANXA11, RAB22A, RAB11B, RAB14, RAB5A, RAB23, RAB11A	6.75914
GOTERM_CC_DIRECT	GO:0000788~nuclear nucleosome	15	7.79144e-08	HIST1H2BB, HIST1H2BC, HIST1H2BD, HIST1H2BH, HIST1H2BO, HIST1H2BM, HIST1H2BN, H2BFS, HIST1H2BK, HIST1H2BL, HIST2H2BE, HIST2H2BF, HIST1H2BJ, HIST3H2A, HIST3H2BB	5.99106
GOTERM_CC_DIRECT	GO:0001725~stress fiber	15	1.28986e-06	ACTA1, MYO1C, ACTN4, FERMT2, FSCN1, ACTN1, MYH6, MYH9, FLNB, SEPT11, CORO1B, ILK, AMOT, MYH14, LCP1	4.8816
GOTERM_CC_DIRECT	GO:0043197~dendritic spine	15	0.00153936	SLC8A1, STX4, HIP1R, LPAR1, ATP1A2, CANX, ITGB1, FARP1, SEPT11, LAMA2, P2RX4, APP, TIAM1, ARF4, GRID2	2.63607
GOTERM_CC_DIRECT	GO:0045095~keratin filament	15	0.00153936	KRT6C, KRT6B, KRT13, FBF1, KRT80, KRT5, KRT79, KRT78, KRT14, KRT1, KRT2, KRT3, KRT4, KRT71, KRT84	2.63607
GOTERM_CC_DIRECT	GO:0019898~extrinsic component of membrane	14	0.000691932	WDFY3, EPB41L3, EZR, VPS13C, VPS13D, WDFY4, ANXA1, MSN, MITD1, SNX33, PRNP, EHD2, FARP1, MUC16	3.0004
GOTERM_CC_DIRECT	GO:0008021~synaptic vesicle	14	0.00205271	CLN3, RAB8A, STX4, RAB3C, MME, SYPL2, VDAC1, LAMP1, SYPL1, RAB11B, RAB5A, VAMP2, ATP6V0D1, CDK16	2.67427
GOTERM_CC_DIRECT	GO:0005623~cell	14	0.00430935	P4HB, PDIA3, AIFM1, PRDX4, PRDX2, PRDX1, FTH1, VCL, PRDX6, APOE, TXNDC5, RYR1, TXNRD1, FTL	2.46033
GOTERM_CC_DIRECT	GO:0005929~cilium	14	0.088953	DNAH10, RAB8A, CAV1, TTC21B, DNAH14, PKM, OFD1, CFAP53, KIF7, CCT8, RAB14, RAB10, TTC21A, TUBB4A	1.62936
GOTERM_CC_DIRECT	GO:0005811~lipid particle	13	0.000304471	CYB5R3, RAB7A, CAV1, VCP, RAB5C, RAB3GAP1, CKAP4, PLIN3, LSS, RAP1B, EHD1, GAPDH, ANXA2	3.4615
GOTERM_CC_DIRECT	GO:0031234~extrinsic component of cytoplasmic side of plasma membrane	13	0.000405678	SNX9, FERMT2, FARP1, IQGAP1, ATP2A2, TIAM1, FYN, RHOA, JAK1, YES1, ABL1, CDK16, SRMS	3.35969
GOTERM_CC_DIRECT	GO:0005796~Golgi lumen	13	0.00814047	HSPG2, VTN, DCN, MMP14, SOD3, SDC3, GPC4, GPC6, F2, VCAN, MUC19, MUC5B, MUC16	2.37978
GOTERM_CC_DIRECT	GO:0055037~recycling endosome	13	0.0223571	RAB8A, TFRC, RAN, RAB4A, RAB4B, RAB14, RAB11B, RAB11A, EEA1, RAB13, RAB10, TUBA1A, ITGB1	2.0769
GOTERM_CC_DIRECT	GO:0030426~growth cone	13	0.0322028	GPRIN1, NRP1, FSCN1, DPYSL3, BASP1, DPYSL2, MYH14, ABL1, APBB2, HNRNPR, IQGAP1, THY1, SETX	1.96947
GOTERM_CC_DIRECT	GO:0045111~intermediate filament cytoskeleton	12	0.000133394	FAAP100, GFAP, EVPL, SYNE2, VIM, CCT8, KRT13, KRT2, KRT4, DST, MDN1, PLEC	4.05549
GOTERM_CC_DIRECT	GO:0016328~lateral plasma membrane	12	0.000159786	CORO1C, JUP, MYO1A, MYO1C, ERBB3, ANK3, ANXA1, GJA1, RAB13, IQGAP1, CTNNB1, APC	3.97897
GOTERM_CC_DIRECT	GO:0031093~platelet alpha granule lumen	12	0.000226027	ISLR, ALDOA, APP, A2M, F5, ACTN4, FGB, ALB, CLU, ACTN1, FN1, TIMP1	3.83428
GOTERM_CC_DIRECT	GO:0005901~caveola	12	0.00100626	CDH13, CLN3, CAV1, CDH15, ATP2B4, ATP1B3, FLOT2, FLOT1, ATP1A1, ATP1A2, EHD2, MYOF	3.24439
GOTERM_CC_DIRECT	GO:0030175~filopodium	12	0.00211123	ACTC1, EZR, ACTA1, MYO1B, FAT1, FSCN1, MSN, ADGRA2, DYNC1H1, ITGB1, LCP1, FARP1	2.97021
GOTERM_CC_DIRECT	GO:0005814~centriole	12	0.0565498	OFD1, RAB8A, CEP120, C2CD3, CEP135, RAN, HSPA6, CEP290, HSPA1A, HSPA1B, CEP152, FBF1	1.86624
GOTERM_CC_DIRECT	GO:0030315~T-tubule	11	3.70272e-05	SLC8A1, EZR, ATP2B4, SLC30A1, ANK3, RYR1, AHNAK2, ATP1A1, ATP1A2, CACNA1S, AHNAK	5.08714
GOTERM_CC_DIRECT	GO:0071944~cell periphery	11	4.72774e-05	CORO1B, KRT19, EZR, KRT17, MYO1B, KRT14, RHOA, NID1, MSN, TUBB3, CTNNB1	4.9567
GOTERM_CC_DIRECT	GO:0055038~recycling endosome membrane	11	0.000142414	RAP2B, RAB8A, RAP2C, RAB11B, RAB11A, ARF6, RAB13, EHD1, RAB10, EHD2, EHD4	4.39344
GOTERM_CC_DIRECT	GO:0014704~intercalated disc	11	0.000173875	JUP, SLC8A1, YWHAH, MYH1, ANK3, GJA1, ATP1A1, ATP1A2, CTNNA1, CAPZB, ITGB1	4.29581
GOTERM_CC_DIRECT	GO:0016459~myosin complex	11	0.000432487	MYL6, MYO1A, MYH1, MYO1C, MYO1B, MYO15A, MYO15B, MYO1D, MYH14, MYH6, MYH9	3.86623
GOTERM_CC_DIRECT	GO:0000922~spindle pole	11	0.0912578	CKAP2, CKAP5, VPS4B, KNTC1, VPS4A, RAB11A, BIRC6, TTC28, FBF1, SMC3, CTNNB1	1.7735
GOTERM_CC_DIRECT	GO:0008180~COP9 signalosome	10	0.0001104	HSPA1L, HSP90AB1, FLOT1, HSPA6, AMOT, ATP5A1, HSPA5, BASP1, NCKIPSD, MYH9	5.02108
GOTERM_CC_DIRECT	GO:0031252~cell leading edge	10	0.000269914	CORO1B, ARF1, ARPC2, VIM, DOCK8, ABL1, MYH9, DST, IQGAP1, SCRIB	4.50609
GOTERM_CC_DIRECT	GO:0005905~clathrin-coated pit	10	0.00358627	APP, PICALM, LRP1, TFRC, LRP10, HIP1R, RAB35, CEMIP, HSPD1, ITSN1	3.19523
GOTERM_CC_DIRECT	GO:0000502~proteasome complex	10	0.00647699	PSMB5, PSMA6, PSMB1, VCP, PSMC2, PSMA4, PSMA3, PSMD1, PSMD2, PSMA7	2.92896
GOTERM_CC_DIRECT	GO:0030666~endocytic vesicle membrane	10	0.0119932	CD9, CAV1, AP2B1, CD36, LRP1, AP2A1, UBC, UBB, UBA52, RPS27A	2.66269
GOTERM_CC_DIRECT	GO:0005793~endoplasmic reticulum-Golgi intermediate compartment	10	0.0144447	P4HB, IST1, COPB1, PDIA6, ANPEP, HSPA5, MAN1A1, SERPINH1, GOLGB1, FN1	2.58438
GOTERM_CC_DIRECT	GO:0045177~apical part of cell	10	0.0259573	APP, EZR, CD36, ABCB11, FAP, VAMP7, DYNC2H1, MSN, DCHS1, CTNNB1	2.34317
GOTERM_CC_DIRECT	GO:0005832~chaperonin-containing T-complex	9	9.0891e-10	CCT7, CCT5, TCP1, CCT4, CCT6B, CCT8, CCT2, CCT3, CCT6A	17.5738
GOTERM_CC_DIRECT	GO:0008305~integrin complex	9	8.93003e-05	ITGA5, ITGAV, ITGA11, ITGB5, ITGA2, ITGA4, ITGB3, MYH9, ITGB1	5.85792
GOTERM_CC_DIRECT	GO:0030017~sarcomere	9	0.00134874	ABCC9, ACTC1, ACTA1, PSMA6, ARF1, ILK, MYH6, MMP2, CAPZB	4.05549
GOTERM_CC_DIRECT	GO:0030669~clathrin-coated endocytic vesicle membrane	9	0.0018942	CD9, AP2B1, APOB, AP1M1, AP1B1, AP2A1, ROR2, CLTC, SH3GL2	3.85766
GOTERM_CC_DIRECT	GO:0030864~cortical actin cytoskeleton	9	0.00260009	EEF1A1, MYO1A, GSN, FLOT2, FLOT1, WDR1, CAP1, MYADM, DSTN	3.67823
GOTERM_CC_DIRECT	GO:0005912~adherens junction	9	0.00678357	TMEM47, SPTBN4, SDCBP, FAM129B, CTNNA1, PLPP3, CTNNB1, APC, VCL	3.16328
GOTERM_CC_DIRECT	GO:0012507~ER to Golgi transport vesicle membrane	9	0.00860716	SEC23A, HLA-H, CD59, HLA-A, HLA-C, HLA-B, SAR1B, HLA-G, B2M	3.04161
GOTERM_CC_DIRECT	GO:0002199~zona pellucida receptor complex	8	6.12328e-08	HSPA1L, CCT7, CCT5, TCP1, CCT4, CCT8, CCT2, CCT3	15.6211
GOTERM_CC_DIRECT	GO:0071682~endocytic vesicle lumen	8	1.3666e-05	HSP90B1, APOB, HSP90AA1, APOA1, APOE, HBA1, CALR, HBB	8.78689
GOTERM_CC_DIRECT	GO:0043034~costamere	8	5.17667e-05	KRT19, ANK3, ILK, AHNAK2, FLNC, AHNAK, PLEC, VCL	7.39948
GOTERM_CC_DIRECT	GO:0031258~lamellipodium membrane	8	5.17667e-05	SYNE2, APC2, ITGAV, FAP, CFL1, FERMT2, ITGB3, DPP4	7.39948
GOTERM_CC_DIRECT	GO:0036464~cytoplasmic ribonucleoprotein granule	8	0.000365718	ACTB, TUBB, MYH1, RAC1, RPS4X, RPS6, TUBA1A, IQGAP1	5.62361
GOTERM_CC_DIRECT	GO:0005790~smooth endoplasmic reticulum	8	0.000476098	APP, PPIB, MYO1D, PRDX4, RYR1, HSPA5, CALR, CANX	5.40731
GOTERM_CC_DIRECT	GO:0031941~filamentous actin	8	0.00148406	ACTG1, MYO1A, MYO1C, SPECC1, FSCN1, FERMT2, DPYSL3, FLNA	4.53517
GOTERM_CC_DIRECT	GO:0016529~sarcoplasmic reticulum	8	0.0026167	CACNA2D1, SYNE2, ATP2A2, JSRP1, ANK3, POMT1, RYR1, CALR	4.135
GOTERM_CC_DIRECT	GO:0005791~rough endoplasmic reticulum	8	0.024477	APP, MPZ, RPN1, RAB14, TP63, HSPD1, RPN2, CANX	2.75667
GOTERM_CC_DIRECT	GO:0005881~cytoplasmic microtubule	8	0.024477	CKAP2, APC2, CLIP1, CLASP1, TUBA1A, TUBA1B, TUBA1C, APC	2.75667
GOTERM_CC_DIRECT	GO:0005871~kinesin complex	8	0.0295783	KIF22, KIF4B, KIF1A, KIF7, KIF21A, KIF26A, YWHAE, KIF26B	2.65264
GOTERM_CC_DIRECT	GO:0005902~microvillus	8	0.0418236	ATP6V1A, MYO1A, EZR, MYO1C, FSCN1, CNP, MSN, ATP6V1B2	2.46649
GOTERM_CC_DIRECT	GO:0043195~terminal bouton	8	0.0612015	P2RX4, RAB7A, PFN2, APP, ILK, RAB5A, STXBP1, DPYSL2	2.26758
GOTERM_CC_DIRECT	GO:0098793~presynapse	8	0.0702649	CADPS, CADPS2, BAIAP3, NF1, EEA1, HSPA8, SCRIB, CHAT	2.19672
GOTERM_CC_DIRECT	GO:0005605~basal lamina	7	0.000106764	LAMA2, COL4A4, LAMA4, LAMB2, LAMA5, NID1, FN1	8.20109
GOTERM_CC_DIRECT	GO:0044291~cell-cell contact zone	7	0.000239276	RAP2B, RAP2C, TIAM1, FLOT2, FLOT1, SCRIB, AHNAK	7.23626
GOTERM_CC_DIRECT	GO:0031674~I band	7	0.00145515	ALDOA, ACTC1, FERMT2, RYR1, KLHL40, TTN, CACNA1S	5.34854
GOTERM_CC_DIRECT	GO:0071556~integral component of lumenal side of endoplasmic reticulum membrane	7	0.00511642	HLA-H, HLA-A, HLA-C, HLA-B, CALR, CANX, HLA-G	4.24194
GOTERM_CC_DIRECT	GO:0009898~cytoplasmic side of plasma membrane	7	0.0302945	ATP2B1, JUP, G6PD, CHMP4B, PTP4A1, KIT, RAB21	2.92896
GOTERM_CC_DIRECT	GO:0001533~cornified envelope	7	0.0447602	EVPL, SPRR2D, SPRR2A, SPRR2B, ANXA1, SPRR2G, SPRR2E	2.67427
GOTERM_CC_DIRECT	GO:0032154~cleavage furrow	7	0.0489467	RHOA, RAB11A, RALA, ARF6, MYH9, ITGB1, RAB21	2.61737
GOTERM_CC_DIRECT	GO:0022627~cytosolic small ribosomal subunit	7	0.0533661	RPS25, RPS16, HBA1, RPS4X, RPS6, RPS27A, RPS8	2.56284
GOTERM_CC_DIRECT	GO:0031594~neuromuscular junction	7	0.0908677	APP, CDH15, SERPINE2, ANK3, POSTN, MYH9, ITGB1	2.23666
GOTERM_CC_DIRECT	GO:0005916~fascia adherens	6	0.000116526	JUP, NRAP, GJA1, ACTN1, CTNNB1, VCL	10.5443
GOTERM_CC_DIRECT	GO:0042612~MHC class I protein complex	6	0.000203627	HLA-H, HLA-A, HLA-C, HLA-B, HLA-G, B2M	9.58569
GOTERM_CC_DIRECT	GO:0005885~Arp2/3 protein complex	6	0.000332752	ACTR3, ACTR2, ARPC1B, ARPC2, ARPC4, ARPC5	8.78689
GOTERM_CC_DIRECT	GO:0005833~hemoglobin complex	6	0.000332752	CYB5R3, HBG1, HBA1, HBG2, HBE1, HBB	8.78689
GOTERM_CC_DIRECT	GO:0031091~platelet alpha granule	6	0.000764465	SERPINE2, FGB, VAMP7, STXBP1, STXBP3, THBS2	7.53162
GOTERM_CC_DIRECT	GO:0005839~proteasome core complex	6	0.00557443	PSMB5, PSMA6, PSMB1, PSMA4, PSMA3, PSMA7	5.02108
GOTERM_CC_DIRECT	GO:0030863~cortical cytoskeleton	6	0.00688181	ACTB, EZR, ACTN4, MYH9, CAPZB, FLNA	4.79285
GOTERM_CC_DIRECT	GO:0030286~dynein complex	6	0.00688181	DNAH10, DNAH14, DYNC2H1, DNHD1, DNAH2, DYNC1H1	4.79285
GOTERM_CC_DIRECT	GO:0015935~small ribosomal subunit	6	0.0166874	RACK1, RPS25, RPS16, RPS4X, RPS6, RPS27A	3.90528
GOTERM_CC_DIRECT	GO:0030016~myofibril	6	0.0193892	ACTG1, OBSCN, NRAP, PSMA6, MYH13, MYH6	3.76581
GOTERM_CC_DIRECT	GO:0005891~voltage-gated calcium channel complex	6	0.0223628	CACNA2D1, CACNA1G, CACNA1H, CACNA1C, CACNA1D, CACNA1S	3.63595
GOTERM_CC_DIRECT	GO:0001772~immunological synapse	6	0.0415687	ALCAM, EZR, LGALS3, CD81, PDCD6IP, MYH9	3.10125
GOTERM_CC_DIRECT	GO:0005641~nuclear envelope lumen	5	0.000604327	TUBB, APP, BCHE, PTGES, IGF2R	10.9836
GOTERM_CC_DIRECT	GO:0016600~flotillin complex	5	0.00103889	CORO1C, FLOT2, FLOT1, CTNNA1, CTNNB1	9.76321
GOTERM_CC_DIRECT	GO:0016342~catenin complex	5	0.00103889	JUP, APC2, CTNNA1, CTNNB1, APC	9.76321
GOTERM_CC_DIRECT	GO:0001931~uropod	5	0.00248246	EZR, FLOT2, FLOT1, MSN, MYH9	7.98808
GOTERM_CC_DIRECT	GO:0034663~endoplasmic reticulum chaperone complex	5	0.00248246	P4HB, HSP90B1, PPIB, PDIA6, HSPA5	7.98808
GOTERM_CC_DIRECT	GO:0042581~specific granule	5	0.00490924	STX4, ANXA11, LTF, STXBP2, STXBP3	6.75914
GOTERM_CC_DIRECT	GO:0042627~chylomicron	5	0.00656714	APOB, APOA1, APOE, APOBR, APOH	6.27635
GOTERM_CC_DIRECT	GO:0031143~pseudopodium	5	0.0136297	ACTN4, VAMP7, ACTN1, CNP, MSN	5.16876
GOTERM_CC_DIRECT	GO:0016234~inclusion body	5	0.0167511	HSP90AB1, WDFY3, SQSTM1, HSPA1A, HSPA1B	4.8816
GOTERM_CC_DIRECT	GO:0031528~microvillus membrane	5	0.0202844	EZR, ITGAV, MSN, ITGB3, CTNNB1	4.62468
GOTERM_CC_DIRECT	GO:0001891~phagocytic cup	5	0.0202844	RACK1, ABCA7, RAC1, ANXA1, LCP1	4.62468
GOTERM_CC_DIRECT	GO:0034361~very-low-density lipoprotein particle	5	0.0242424	APOB, APOA1, APOE, APOBR, APOH	4.39344
GOTERM_CC_DIRECT	GO:0005771~multivesicular body	5	0.0334688	STEAP3, LAMP1, TSG101, RAB11A, GJA1	3.99404
GOTERM_CC_DIRECT	GO:0002102~podosome	5	0.0444764	GSN, FSCN1, WDR1, LCP1, SH3GL1	3.6612
GOTERM_CC_DIRECT	GO:0032593~insulin-responsive compartment	4	0.00539372	RAB4A, RAB4B, RAB13, RAB10	10.0422
GOTERM_CC_DIRECT	GO:0044754~autolysosome	4	0.00826736	LAMP2, SQSTM1, FTH1, FTL	8.78689
GOTERM_CC_DIRECT	GO:0019773~proteasome core complex, alpha-subunit complex	4	0.00826736	PSMA6, PSMA4, PSMA3, PSMA7	8.78689
GOTERM_CC_DIRECT	GO:0090543~Flemming body	4	0.00826736	RAN, IST1, VPS4B, VPS4A	8.78689
GOTERM_CC_DIRECT	GO:0005614~interstitial matrix	4	0.0341369	NAV2, TNC, CCDC80, ABI3BP	5.40731
GOTERM_CC_DIRECT	GO:0030122~AP-2 adaptor complex	4	0.0341369	EGFR, AP2B1, PICALM, AP2A1	5.40731
GOTERM_CC_DIRECT	GO:0070971~endoplasmic reticulum exit site	4	0.0341369	APOB, HLA-A, PDCD6IP, PDCD6	5.40731
GOTERM_CC_DIRECT	GO:0005859~muscle myosin complex	4	0.0589364	MYH1, MYH13, MYH6, TTN	4.39344
GOTERM_CC_DIRECT	GO:0035371~microtubule plus-end	4	0.068645	CKAP5, CLIP1, CLASP1, DST	4.135
GOTERM_CC_DIRECT	GO:0031527~filopodium membrane	4	0.068645	SYNE2, ITGAV, ARF6, ITGB3	4.135
GOTERM_CC_DIRECT	GO:0005589~collagen type VI trimer	3	0.00931987	COL6A3, COL6A1, DCN	17.5738
GOTERM_CC_DIRECT	GO:0043260~laminin-11 complex	3	0.00931987	LAMB2, LAMA5, LAMC1	17.5738
GOTERM_CC_DIRECT	GO:0071062~alphav-beta3 integrin-vitronectin complex	3	0.00931987	ITGA5, VTN, ITGB3	17.5738
GOTERM_CC_DIRECT	GO:0043259~laminin-10 complex	3	0.00931987	LAMA5, LAMC1, LAMB1	17.5738
GOTERM_CC_DIRECT	GO:1990752~microtubule end	3	0.017938	ACTR1A, ACTR1B, CLIP1	13.1803
GOTERM_CC_DIRECT	GO:0005587~collagen type IV trimer	3	0.0415563	COL4A4, COL4A3, COL4A2	8.78689
GOTERM_CC_DIRECT	GO:1990454~L-type voltage-gated calcium channel complex	3	0.0415563	CACNA2D1, CACNA1C, CACNA1D	8.78689
GOTERM_CC_DIRECT	GO:0005828~kinetochore microtubule	3	0.0415563	KNTC1, RAB11A, CLASP1	8.78689
GOTERM_CC_DIRECT	GO:0044354~macropinosome	3	0.0415563	CLIP1, MMP14, ANXA2	8.78689
GOTERM_CC_DIRECT	GO:0035748~myelin sheath abaxonal region	3	0.0415563	CNP, ITGB1, SCRIB	8.78689
GOTERM_CC_DIRECT	GO:0035749~myelin sheath adaxonal region	3	0.0415563	STX4, CNP, ANXA2	8.78689
GOTERM_CC_DIRECT	GO:0071438~invadopodium membrane	3	0.0415563	FAP, ITGB1, DPP4	8.78689
GOTERM_CC_DIRECT	GO:0016528~sarcoplasm	3	0.0560214	GSN, FLNC, PLEC	7.53162
GOTERM_CC_DIRECT	GO:0046581~intercellular canaliculus	3	0.0560214	ABCB11, ABCC2, DPP4	7.53162
GOTERM_CC_DIRECT	GO:0030056~hemidesmosome	3	0.0719394	JUP, DST, PLEC	6.59016
GOTERM_CC_DIRECT	GO:0044853~plasma membrane raft	3	0.0890988	MYO1A, EZR, MYO1D	5.85792
GOTERM_CC_DIRECT	GO:0005915~zonula adherens	3	0.0890988	JUP, CTNNA1, VCL	5.85792
GOTERM_CC_DIRECT	GO:0005577~fibrinogen complex	3	0.0890988	FBLN1, FGB, FN1	5.85792

## Sheet: GO_MF
Category	Term	Count	PValue	Gene Symbol	Fold Enrichment
GOTERM_MF_DIRECT	GO:0005515~protein binding	646	5.88467e-20	LDHB, RP1, LDHA, HRAS, A2M, TUBB2A, TLDC1, SYNCRIP, ITSN1, MAGEC1, CTNNB1, B2M, ACTG1, APP, DHX38, SERPINE2, CUL9, FAP, ILK, VPS4B, VPS4A, RPL11, DDAH2, LRRC7, YARS, BSG, MAGI2, MYH1, MED12, MYH9, CTNNA1, THY1, ST13, JUP, FAAP100, NPC1, TAGLN, F5, SERPINF1, RPS16, NME1, ASCC3, F2, RYR1, ROR2, ARL8A, ARL8B, SH3GL2, SH3GL1, GNAI3, AHCY, GNAI2, ERBB3, HSPA1A, ARF6, HSPA1B, SCRIB, ALCAM, HSPA1L, RPS2…	1.26667
GOTERM_MF_DIRECT	GO:0005524~ATP binding	159	3.0382e-14	STK36, CCT2, CCT3, TTN, SETX, ATP2B1, ACTG1, ATP2B4, DHX38, CUL9, ILK, VPS4B, DYNC2H1, VPS4A, DDX21, EGFR, CIITA, YARS, DARS, MYH1, ABCB11, AARS, MYH6, MYH9, ATP9B, NME1, ASCC3, NAV2, RARS, PI4K2A, PDGFRA, ROR2, PDGFRB, KIF26A, KIF26B, ACTBL2, ABCA7, KIF4B, DNAH10, DNAH14, ERBB3, PTK7, ABCA2, HSPA1A, ATP6V1B2, ABCA1, HSPA1B, ATP12A, RIOK2, ABCA5, HSPA1L, MYO15A, MYO15B, DNAJA1, POLQ, RUNX3, GUCY2…	1.83201
GOTERM_MF_DIRECT	GO:0044822~poly(A) RNA binding	120	8.75562e-11	SNRPD3, SYNCRIP, CCT3, ZNF638, DHX38, SRRM2, RPN1, ZNF579, DDX21, RPL11, PUM2, RPS27A, YARS, ACTN4, DARS, RAN, HNRNPA2B1, HLA-A, EEF2, MYH9, CTNNA1, HNRNPR, RPS16, NME1, ASCC3, CSTB, ALDOA, DIAPH1, NOC3L, STIP1, CALR, SERPINH1, RPS25, PFN1, HIST1H4A, RPL7, MACF1, EIF3L, RPL5, RPL7A, EEF1A1, P4HB, LGALS3, CKAP4, LGALS1, FSCN1, HEATR1, DDX5, RPS6, RPS8, CCT4, VCP, PPIB, ARF1, RPL18A, PPIA, UBA1, CP…	1.83088
GOTERM_MF_DIRECT	GO:0098641~cadherin binding involved in cell-cell adhesion	76	3.84087e-29	RTN4, HSP90AB1, LDHA, TLN1, CHMP4B, CAPZA1, PRDX1, IQGAP1, CTNNB1, VCL, PKM, PICALM, ARHGAP1, FAM129B, AHNAK, EGFR, VASN, BSG, RAN, SLC3A2, PI4KA, PFKP, EEF2, CLIC1, MYH9, CTNNA1, FLNB, FLNA, JUP, EVPL, PRDX6, RARS, EEF1G, SDCBP, RUVBL1, RAB10, SH3GL1, ALDOA, SNX9, YWHAZ, HCFC1, HSPA1A, HSPA1B, TAGLN2, CAPZB, ITGB1, SCRIB, RACK1, PFN1, EZR, MACF1, ATIC, PLIN3, RAB11B, FASN, IDH1, RPL7A, HSPA5, EH…	4.51427
GOTERM_MF_DIRECT	GO:0005525~GTP binding	76	4.34147e-21	GNA13, HSP90AB1, HRAS, RAB5B, TUBB2A, RAB5C, GNA11, RAB1B, DIRAS2, RALB, RHOA, RAB23, RRAS, RALA, TUBB6, TUBA1A, TUBB1, SAR1B, SAR1A, TUBA1B, TUBB3, RHOG, TUBA1C, RAB21, CIITA, RAP2B, HSP90AA1, RAP2C, RAN, RAB4A, RAB4B, EEF2, GNAQ, NME1, EEF1A1P5, REM1, RAB14, RAB5A, TUBA4A, GNAS, ARL8A, ARL8B, RAB13, RAB10, RAB7A, GNAI3, RAB3C, GNAI2, ARF6, RRAGC, ANXA6, TUBB, RAB44, RAC1, RAB11B, RAB11A, EHD1, …	3.40922
GOTERM_MF_DIRECT	GO:0042802~identical protein binding	75	4.44297e-06	KCNH1, LDHB, GFAP, LDHA, CHMP4B, TP63, VTN, TTN, PRDX1, B2M, SETX, OFD1, ACTG1, APP, APOA1, APOE, VPS4B, APOH, CEP290, DPP4, FTL, EGFR, HSP90AA1, PRKAB2, STXBP1, SDK1, FLNB, ST13, UHRF1, G6PD, NME1, IGF2R, COL1A2, SDCBP, COL1A1, PRNP, SH3GL2, LCP1, UGP2, SH3GL1, MVP, ALDOA, CAV1, YWHAZ, AHCY, ERBB3, VIM, HCFC1, COL2A1, ITGB3, CLDN11, PSMA7, COIL, COL7A1, BCHE, ALB, SQSTM1, PTX3, GAPDH, FN1, ACTB,…	1.72485
GOTERM_MF_DIRECT	GO:0005509~calcium ion binding	72	6.37458e-06	PCDHGA9, EDIL3, TTN, ITSN1, CANX, IQGAP1, GSN, PLCB2, PLS3, ACTN4, PCDH11X, ACTN1, MAN1A1, MMP14, PCDHGB4, SLIT3, ANXA2P2, F2, RYR1, VCAN, DST, LCP1, PKDREJ, MYL6, MEGF8, EFCAB6, PCDHGC5, C1R, PCDHGC4, CALR, DCHS1, ANXA6, ANXA7, RAB44, FAT3, MACF1, FAT1, FAT2, HSPA5, EHD1, THBS2, EHD2, EHD4, SLC8A1, EFEMP2, FBN1, S100A11, ANXA1, HSPG2, CELSR3, CELSR2, NID1, NID2, ANXA5, ANXA4, ANXA2, NOTCH3, CDH1…	1.72976
GOTERM_MF_DIRECT	GO:0003924~GTPase activity	58	4.77835e-21	GNA13, HRAS, RAB5B, RAB5C, TUBB2A, GNA11, RHOA, RAB23, RALB, TUBB6, RALA, RRAS, TUBA1A, TUBB1, SAR1B, TUBA1B, TUBA1C, RHOG, RAB21, TUBB3, RAN, RAB4A, EEF2, GNAQ, GNB2, GNB1, EEF1A1P5, RAB5A, RAB14, TUBA4A, ARL8A, GNAS, ARL8B, RAB13, RAB10, RAB7A, GNAI3, RAB3C, GNAI2, ARF6, RRAGC, TUBB, RAC1, RAB11B, RAB11A, TUBB4A, TUBB4B, RAB2A, EEF1A1, RAB8A, RAB8B, ARF1, ARF3, RAB35, RAB22A, ARF4, RAP1A, RAP1B	4.26957
GOTERM_MF_DIRECT	GO:0042803~protein homodimerization activity	58	0.0127936	NAMPT, CHMP4B, TSG101, HIP1R, PRDX4, MITD1, SLC16A1, APOE, FAP, VPS4B, ANO6, DPP4, EMSY, HSP90AA1, ADAM10, ACTN4, ACTN1, MYH9, HLA-G, FLNA, JUP, STOM, G6PD, TIMELESS, PDGFRA, SDCBP, CLIP1, PDCD6IP, DST, SNX9, ERBB3, PML, ADH5, EEA1, KIT, ANXA6, RACK1, GLIPR2, ECE1, RPL7, SQSTM1, ATIC, FASN, IDH1, GUCY2F, LGALS1, S100A11, ANXA1, TKT, ABCG2, P2RX4, CDH13, TFRC, ZBTB4, CPNE1, DPYD, PDCD6, ENG	1.3686
GOTERM_MF_DIRECT	GO:0005198~structural molecule activity	55	9.28274e-18	COPA, MPZL1, GFAP, TLN2, CLTC, VCL, KRT80, COPB1, SNTB2, TUBA1A, TUBA1B, TUBA1C, KRT13, CTNNA1, JUP, EPB41L3, KRT19, EVPL, KRT17, LAMC3, KRT16, KRT15, KRT14, MAP7D3, KRT6C, CAV1, VIM, SPRR2G, CLDN11, SPRR2E, KRT9, TUBB, LAMB2, KRT27, KRT5, SPRR2D, FGB, SPRR2A, SPRR2B, KRT1, KRT3, KRT4, LAMB1, COL18A1, COL4A3, MPZ, COL15A1, ANXA1, LMNA, LAMA2, LAMA3, LAMA5, KRT79, KRT78, KRT71	3.83564
GOTERM_MF_DIRECT	GO:0046982~protein heterodimerization activity	51	1.83864e-05	KCNH1, HIST2H2AA3, HEXA, CTNNB1, HIST1H2BO, HIST2H2AB, HIST1H2BM, H2BFS, HIST1H2BN, HIST1H2BK, HIST1H2BL, HIST2H2AC, HIST1H2BJ, HIST3H2A, H2AFX, HIST3H2BB, EGFR, FLOT2, FLOT1, H2AFJ, CTNNA1, TIMELESS, HIST2H2BE, HIST2H2BF, SDCBP, HIST1H2AB, HIST1H2AC, CAV1, HIST1H2AA, PANX1, HIST1H2AG, ERBB3, HIST1H2AD, PML, ITGB1, RRAGC, HIST1H4A, P4HB, GUCY2F, HIST1H2BB, HIST1H2BC, HIST1H2BD, HIST1H2BH, AXL, IT…	1.88925
GOTERM_MF_DIRECT	GO:0019899~enzyme binding	43	1.71969e-06	CAV1, A2M, HIST1H2AG, SNRPD3, HSPA1A, ARPC4, HSPA1B, ITGB3, TTN, CTNNB1, RACK1, APP, APOA1, HSPA2, BCHE, RAC1, HSPA6, H2AFX, SLC4A2, HSPA5, SCARB2, YES1, KPNB1, HSPA8, EGFR, P4HB, YWHAB, TSPAN14, DDX5, YWHAE, NOTCH3, LAMP1, PLSCR1, LAMP2, YWHAH, ATP2A2, FYN, POLD1, KRT79, IGF2R, PDGFRB, TUBA4A, PARP4	2.22432
GOTERM_MF_DIRECT	GO:0005102~receptor binding	43	7.62066e-06	CAV1, A2M, PANX1, C3, DIAPH1, SNX17, C5, GJA1, HSPA1A, AKAP9, HSPA1B, ABCA1, MIF, RACK1, ALCAM, PFN1, APP, SERPINE2, FGB, IDH1, ANGPTL1, MSN, YES1, ANGPTL2, DPP4, ABCA12, RAB8B, ADAM10, MYO1C, ANXA1, HLA-A, CD276, HLA-B, HLA-G, LAMA2, P2RX4, LAMA4, LAMA3, F2, JAK1, PDGFRB, ABL1, SRMS	2.09829
GOTERM_MF_DIRECT	GO:0051015~actin filament binding	41	8.87451e-19	TRIOBP, TLN1, PANX1, TLN2, HIP1R, ARPC4, ARPC5, TTN, CAPZB, DSTN, ACTR3, ACTR2, EZR, MACF1, ARPC2, PLS3, EGFR, MYO1A, ACTN4, MYO1B, MYO1D, FSCN1, CORO6, ACTN1, EEF2, FLNC, CTNNA1, MYH9, FLNA, CORO1C, CORO1B, ARPC1B, SYNE2, CFL1, CYFIP1, MARCKS, WDR1, MYH14, SPTA1, ABL1, LCP1	5.35035
GOTERM_MF_DIRECT	GO:0005200~structural constituent of cytoskeleton	40	4.41528e-21	TLN1, GFAP, KRT6B, TLN2, TUBB2A, VIM, ARPC4, ARPC5, KRT9, ACTR3, ACTG1, ACTR2, TUBB, KRT5, ANK3, SORBS2, ARPC2, KRT2, TUBB6, MSN, TUBA1A, TUBB1, TUBA1B, TUBA1C, TUBB4A, TUBB3, TUBB4B, KRT84, ACTB, ACTA1, SPTBN4, EPB41L3, ARPC1B, KRT19, KRT17, KRT16, KRT15, KRT14, TUBA4A, SPTA1	6.26382
GOTERM_MF_DIRECT	GO:0016887~ATPase activity	40	9.63309e-13	ABCA7, KIF22, DNAH10, CLU, HSPA1A, ABCA2, HSPA1B, DNAH2, ABCA1, RNF213, DNAH5, ABCA5, KIF7, MACF1, VPS4B, DYNC2H1, VPS4A, HSPA5, DYNC1H1, KIF21A, MDN1, HSPA8, ABCA12, ACTC1, HSP90AA1, RALBP1, ATP1A2, MYH6, MYH9, ABCG2, KIF1A, ATP13A1, VCP, PSMC2, ABCC1, ATP5A1, RUVBL1, HSPD1, KIF26A, DST	3.76514
GOTERM_MF_DIRECT	GO:0003779~actin binding	39	7.42253e-07	GC, ALDOA, TLN2, DIAPH1, CAPZA1, CAPZB, ITGB1, VCL, PFN1, ACE, EZR, MACF1, GSN, MYO15A, SNTB2, CAP1, MSN, PLEC, PPP1R18, MYO1C, MYH1, ACTN4, FSCN1, MICAL3, SPTBN4, MYH6, MYH9, FLNB, EPB41L3, SYNE2, YWHAH, XIRP1, NRAP, TAGLN, NEB, XIRP2, MYH13, DST, LCP1	2.41653
GOTERM_MF_DIRECT	GO:0019901~protein kinase binding	38	0.0011644	HSP90AB1, KCNH1, CAV1, YWHAZ, AP1B1, NBEA, CLTC, GPRC5B, TTN, TCF7L2, IQGAP1, CTNNB1, SQSTM1, RAC1, ILK, MSN, APC, EGFR, EEF1A1, RAB8A, ADAM10, SLC12A4, STXBP1, EEF2, ATP1A1, DPYSL2, MYH6, RPS6, CEP152, VDAC1, THY1, CADPS, JUP, AP2A1, NME1, ZBTB4, PDGFRB, MVP	1.74088
GOTERM_MF_DIRECT	GO:0005178~integrin binding	35	3.6989e-17	TLN1, GFAP, TSPAN4, VTN, EDIL3, CD151, CALR, ITGB1, PLPP3, ANXA7, CD9, LAMB2, FAP, TGFBI, ILK, GPNMB, FN1, EGFR, P4HB, COL4A3, ADAM10, TNXB, ACTN4, FBN1, ACTN1, ITGA2, MFGE8, MMP14, COL16A1, KDR, THY1, FBLN1, LAMA5, ITGA5, DST	5.74184
GOTERM_MF_DIRECT	GO:0031625~ubiquitin protein ligase binding	35	5.96172e-05	SNX9, TRIOBP, YWHAZ, TSG101, CLU, PML, HSPA1A, CCT2, HSPA1B, CALR, VCL, HSPA1L, ACTG1, TPI1, TUBB, SQSTM1, CUL9, DNAJA1, RALB, RALA, HSPA5, TUBA1B, HSPA8, HSPA9, EGFR, TCP1, SCAMP3, UBE2NL, YWHAE, UBE2N, GPI, VCP, PRDX6, JAK1, HSPD1	2.10067
GOTERM_MF_DIRECT	GO:0019904~protein domain specific binding	33	4.01661e-07	YWHAZ, GNAI3, MITD1, IQGAP1, TUBB, EZR, HIST1H4A, GSN, VPS4A, HSPA5, TUBA1A, PLXND1, EHD2, KPNB1, RAP2B, ARHGEF4, MYO1D, YWHAB, STXBP1, MED12, ATP1A1, BASP1, MYH9, YWHAE, ST13, LAMP1, LAMP2, YWHAG, YWHAH, VCP, IST1, YWHAQ, ABCC2	2.73289
GOTERM_MF_DIRECT	GO:0005516~calmodulin binding	32	1.41421e-07	CEP97, KCNH1, AEBP1, EEA1, TTN, IQGAP1, ATP2B1, ATP2B4, MYO15A, SNTB2, PPP3CC, ASPM, EGFR, TRPM4, OBSCN, SLC8A1, MYO1A, MYH1, MYO1C, MYO1B, MYO1D, UBR4, MYH6, MYH9, DDX5, RYR1, REM1, MYH13, MARCKS, VAMP2, MYH14, CACNA1C	2.91649
GOTERM_MF_DIRECT	GO:0051082~unfolded protein binding	31	4.94284e-13	HSP90AB1, CCT2, HSPA1A, HSPA1B, CCT3, CALR, SERPINH1, CANX, HSPA1L, CCT6B, HSPA2, HSPA6, DNAJA1, HSPA5, MDN1, HSPA8, TUBB4B, HSPA9, CLN3, TCP1, HSP90AA1, CCT6A, ST13, CCT7, CCT5, HSP90B1, CCT4, PPIB, PPIA, CCT8, HSPD1	4.85446
GOTERM_MF_DIRECT	GO:0032403~protein complex binding	29	2.32211e-05	ITGB1, IQGAP1, TUBB, AP2B1, PEX1, RRAS, ATP6V0D1, CIITA, PTPRF, FBN1, PFKP, YWHAB, ITGA2, VDAC1, ST13, NRAS, FBLN1, KRT19, LRP1, PPIB, GNB2, GNB1, AP2A1, IST1, CYFIP1, RAP1A, GNB4, RAP1B, VPS28	2.42495
GOTERM_MF_DIRECT	GO:0019003~GDP binding	25	3.90235e-16	RAB2A, RAP2B, RAB7A, RAB8A, RAP2C, GNAI3, RAB8B, RAB5B, RAB5C, RAN, RAB4A, RRAGC, ARF1, RAB35, RAB22A, RALB, RAB5A, RAB11B, RAB14, RALA, RRAS, RAP1B, ARL8B, RAB10, RAB21	7.97477
GOTERM_MF_DIRECT	GO:0008201~heparin binding	25	1.70799e-05	NRP1, TNXB, PTPRF, FBN1, CCDC80, VTN, POSTN, COL5A3, ABI3BP, SOD3, PCOLCE, SLIT3, APOB, APP, LPA, SERPINE2, NAV2, APOE, SERPINC1, APOH, LTF, LAMC2, GPNMB, THBS2, FN1	2.69149
GOTERM_MF_DIRECT	GO:0008022~protein C-terminus binding	25	0.000140264	HRAS, CEP120, SNX17, VIM, STIP1, COIL, CTNNB1, PEX1, VPS4B, VPS4A, CIITA, MYO1C, CEP135, BAIAP3, YWHAB, HSPG2, MED12, TAX1BP3, FBLN1, ATP2A2, AP2A1, YWHAQ, SDCBP, ABL1, DST	2.36614
GOTERM_MF_DIRECT	GO:0044325~ion channel binding	24	1.08914e-07	KCNH1, HSP90AB1, SLC8A1, CAV1, HSP90AA1, ACTN4, PANX1, DIAPH1, ACTN1, RNF207, AKAP9, YWHAE, FLNA, VDAC1, CTNNB1, ABCC9, YWHAH, ANK3, FYN, NPTN, YWHAQ, PRNP, YES1, SCN10A	3.65852
GOTERM_MF_DIRECT	GO:0005201~extracellular matrix structural constituent	23	1.09897e-11	COL4A4, COL4A3, COL4A2, PXDN, TNXB, EFEMP2, FBN1, COL15A1, COL2A1, COL5A3, TINAGL1, COL5A2, LAMA4, FBLN1, COL19A1, FBLN2, COL27A1, COL1A2, VCAN, COL1A1, LAMC1, LAMB1, MUC5B	5.91323
GOTERM_MF_DIRECT	GO:0004871~signal transducer activity	23	0.00375059	GNA13, YARS, GNAI3, MAGI2, SLC44A2, GNAI2, LGALS1, GNA11, NDFIP1, TSPAN6, NDFIP2, GJA1, FLNA, CTNNB1, JUP, PLCL1, GNAQ, GNB2, GNB1, ILK, GNB4, GNAS, PLCB2	1.94209
GOTERM_MF_DIRECT	GO:0008017~microtubule binding	23	0.00473237	KIF4B, RP1, KIF22, APC2, DPYSL2, EML4, KIF1A, MAST2, EZR, KIF7, MACF1, TIAM1, CLIP1, RAB11A, CCSER2, CLASP1, KIF21A, PRNP, KIF26A, GAPDH, MAP7D3, KIF26B, APC	1.90474
GOTERM_MF_DIRECT	GO:0002020~protease binding	19	1.81439e-05	A2M, PANX1, FLOT2, FLOT1, KIT, ITGB3, TTN, ITGB1, ANXA2, TIMP1, LRP1, ITGAV, FAP, RYR1, UBC, SERPINC1, CSTB, DPP4, FN1	3.24044
GOTERM_MF_DIRECT	GO:0005215~transporter activity	19	0.0463955	TCIRG1, ABCA7, AP1B1, ABCB11, SLC12A4, CRABP2, ABCA2, ABCA1, SYPL2, ABCA5, ABCG2, ABCC9, SLCO1A2, SYPL1, IGF2R, CPNE1, ABCC1, CPNE3, ABCA12	1.62022
GOTERM_MF_DIRECT	GO:0005518~collagen binding	17	1.93561e-07	ITGA11, ITGA2, NID1, VTN, DCN, NID2, COL5A3, LRRC15, DDR2, SERPINH1, ABI3BP, PCOLCE, CTSK, CD44, PPIB, TGFBI, FN1	4.88056
GOTERM_MF_DIRECT	GO:0001948~glycoprotein binding	17	6.37505e-07	HSP90AB1, EGFR, GFAP, HSP90AA1, LGALS1, VIM, CTSA, CALR, CANX, FLNA, B2M, TFRC, FYN, IGF2R, APOH, SDCBP, HSPA5	4.50513
GOTERM_MF_DIRECT	GO:0048306~calcium-dependent protein binding	16	7.17554e-07	A2M, TSG101, MYO1D, ANXA1, S100A11, DDX5, ANXA4, ANXA2, ANXA6, ANXA7, PLSCR3, ANXA11, CPNE3, PDCD6IP, VAMP2, PDCD6	4.75186
GOTERM_MF_DIRECT	GO:0001618~virus receptor activity	16	9.04584e-06	AXL, ITGB5, ITGA2, HSPA1A, ANPEP, HSPA1B, ITGB3, ITGB1, LAMP1, SLC1A5, NPC1, TFRC, ITGA5, ITGAV, SCARB2, DPP4	3.93726
GOTERM_MF_DIRECT	GO:0003777~microtubule motor activity	15	0.000184951	DNAH10, KIF4B, KIF22, DNAH14, DNHD1, DNAH2, SMC3, DNAH5, KIF1A, KIF7, DYNC2H1, KIF21A, KIF26A, DYNC1H1, KIF26B	3.22978
GOTERM_MF_DIRECT	GO:0051087~chaperone binding	15	0.000211862	CLU, SACS, RNF207, ATP1A1, STIP1, ATP1A2, HLA-B, CALR, ST13, ALB, FGB, DNAJA1, HSPD1, HSPA5, PRNP	3.18991
GOTERM_MF_DIRECT	GO:0004713~protein tyrosine kinase activity	14	0.0450876	EGFR, HSP90AA1, FLT1, ERBB3, AXL, KIT, TTN, KDR, FYN, PDGFRB, JAK1, ABL1, YES1, SRMS	1.81321
GOTERM_MF_DIRECT	GO:0008289~lipid binding	14	0.0998139	PSAP, ANXA6, CADPS, APOA1, CD36, VCP, CADPS2, APOE, TIAM1, APOH, SH3GL2, IQSEC1, PLTP, SH3GL1	1.59707
GOTERM_MF_DIRECT	GO:0003774~motor activity	13	0.000364239	MYL6, MYO1A, MYO1C, MYH1, MYO1B, MYO1D, MYH6, MYH9, KIF1A, MYO15A, MYO15B, DYNC2H1, MYH14	3.3929
GOTERM_MF_DIRECT	GO:0004867~serine-type endopeptidase inhibitor activity	13	0.0102296	RECK, APP, A2M, PZP, SERPINE2, COL7A1, SERPINF1, COL6A3, CD109, SERPINC1, ITIH2, ITIH3, SERPINH1	2.30857
GOTERM_MF_DIRECT	GO:0004175~endopeptidase activity	12	0.000226128	NCSTN, ACE, ECE1, ADAM10, PSMA6, TMEM59, FAP, PSMA3, PSMD1, PSMD2, CPNE1, MME	3.82789
GOTERM_MF_DIRECT	GO:0003725~double-stranded RNA binding	12	0.000681589	HSP90AB1, TFRC, VIM, EIF4A1, SLC3A2, ACTN1, DDX21, HSPD1, MSN, CLTC, TUBA1B, TUBB4B	3.38862
GOTERM_MF_DIRECT	GO:0005543~phospholipid binding	12	0.0107314	APOB, APOA1, APOE, SPTBN4, WDFY4, ANXA1, APOH, LPAR1, VAMP2, ABCA1, ANXA5, MYOF	2.40356
GOTERM_MF_DIRECT	GO:0001664~G-protein coupled receptor binding	11	0.00110658	GNAI3, GNAI2, FYN, PSAP, DNAJA1, USP20, HSPA1A, HSPA1B, GPRC5B, FLNA, HSPA8	3.4451
GOTERM_MF_DIRECT	GO:0005544~calcium-dependent phospholipid binding	11	0.00168714	ANXA6, ANXA7, ANXA10, ANXA11, ANXA1, CPNE1, CPNE3, ANXA5, ANXA4, ANXA2, ANXA2P2	3.26691
GOTERM_MF_DIRECT	GO:0019903~protein phosphatase binding	11	0.00318265	KAT2A, RACK1, JUP, EGFR, HSP90B1, HSP90AA1, VCP, JAK1, IQGAP1, CTNNB1, MVP	3.00763
GOTERM_MF_DIRECT	GO:0051287~NAD binding	10	0.000253314	GAPDHS, CYB5R3, LDHB, LDHA, AHCY, AOX1, PHGDH, UGDH, IDH1, GAPDH	4.53303
GOTERM_MF_DIRECT	GO:0004714~transmembrane receptor protein tyrosine kinase activity	10	0.000253314	EGFR, FLT1, ERBB3, PDGFRA, AXL, NPTN, ROR2, KIT, DDR2, KDR	4.53303
GOTERM_MF_DIRECT	GO:0004866~endopeptidase inhibitor activity	10	0.00038278	RECK, A2M, LPA, PZP, C3, C5, CD109, CSTB, ITIH2, ITIH3	4.30638
GOTERM_MF_DIRECT	GO:0042626~ATPase activity, coupled to transmembrane movement of substances	10	0.000805704	ABCA7, ABCC9, ABCB11, ABCC1, ABCA2, ABCC2, ABCA1, ABCA5, ABCG2, ABCA12	3.91489
GOTERM_MF_DIRECT	GO:0008092~cytoskeletal protein binding	10	0.00154836	ALDOA, SLC8A1, ANK3, KRT2, DLG5, NCKIPSD, FLNC, FARP1, ANXA2, ANXA2P2	3.58865
GOTERM_MF_DIRECT	GO:0030674~protein binding, bridging	10	0.0336711	ST13, CAV1, EVPL, COL19A1, FGB, ANK3, FSCN1, ANXA1, COL1A2, ARPC4	2.23708
GOTERM_MF_DIRECT	GO:0001968~fibronectin binding	9	7.60275e-05	CTSK, FBLN1, LPA, ITGAV, CCDC80, ITGA4, ITGB3, LRRC15, ITGB1	5.96268
GOTERM_MF_DIRECT	GO:0097110~scaffold protein binding	9	0.00592597	ATP2B4, PANX1, KRT5, KRT15, VIM, GRID2, CACNA1G, CACNA1H, GJA1	3.22978
GOTERM_MF_DIRECT	GO:0050839~cell adhesion molecule binding	9	0.0261616	JUP, EZR, FGB, NPTN, POSTN, MSN, ITGA4, ITGB3, ITGB1	2.50048
GOTERM_MF_DIRECT	GO:0008144~drug binding	9	0.0726649	HSP90AB1, P2RX4, NAMPT, ACE, ALB, FSCN1, FASN, ATP1A2, GSTP1	2.03986
GOTERM_MF_DIRECT	GO:0008237~metallopeptidase activity	9	0.0969136	LNPEP, ACE, ADAM10, PAPPA, MME, ANPEP, NPEPPS, ADAM12, MMP2	1.91395
GOTERM_MF_DIRECT	GO:0042623~ATPase activity, coupled	8	1.32282e-06	PEX1, CCT8, VPS4B, HSPA6, VPS4A, HSPA1A, HSPA1B, HSPA8	11.4837
GOTERM_MF_DIRECT	GO:0045296~cadherin binding	8	0.000232948	JUP, P2RX4, CDH13, ANK3, CTNNA1, CTNNB1, APC, VCL	5.99148
GOTERM_MF_DIRECT	GO:0051020~GTPase binding	8	0.000536454	HSP90AA1, GNB2, GNB1, GOLGA4, FLNA, LCP1, SH3GL1, ENO1	5.30016
GOTERM_MF_DIRECT	GO:0048365~Rac GTPase binding	8	0.0074971	CORO1C, RAB7A, CAV1, TIAM1, RALBP1, CYFIP1, FLNA, IQGAP1	3.4451
GOTERM_MF_DIRECT	GO:0042277~peptide binding	8	0.0535172	LNPEP, PPIB, PPIA, MME, ANPEP, NPEPPS, CALR, TUBB3	2.33566
GOTERM_MF_DIRECT	GO:0030898~actin-dependent ATPase activity	7	4.51809e-05	MYL6, MYO1C, MYO1B, MYO1D, MYH14, MYH6, MYH9	9.27527
GOTERM_MF_DIRECT	GO:0044548~S100 protein binding	7	4.51809e-05	EZR, ATP2A2, ANXA11, S100A11, IQGAP1, AHNAK, ANXA2	9.27527
GOTERM_MF_DIRECT	GO:0023026~MHC class II protein complex binding	7	0.000181345	HSP90AB1, PKM, HSP90AA1, ANXA11, CD81, YWHAE, HSPA8	7.53616
GOTERM_MF_DIRECT	GO:0030506~ankyrin binding	7	0.000718532	OBSCN, SLC8A1, SPTBN4, ATP1A1, FLNC, CACNA1D, PLEC	6.02893
GOTERM_MF_DIRECT	GO:0000146~microfilament motor activity	7	0.000718532	MYO1C, MYO1B, MYO1D, MYH13, MYH14, MYH6, MYH9	6.02893
GOTERM_MF_DIRECT	GO:0004298~threonine-type endopeptidase activity	7	0.000956997	TASP1, PSMB5, PSMA6, PSMB1, PSMA4, PSMA3, PSMA7	5.74184
GOTERM_MF_DIRECT	GO:0043236~laminin binding	7	0.00255996	LGALS3, LGALS1, ITGA2, NID1, LRRC15, TINAGL1, ITGB1	4.82314
GOTERM_MF_DIRECT	GO:0015485~cholesterol binding	7	0.0296479	ANXA6, CAV1, NPC1, APOA1, OSBPL8, APOE, ABCA1	2.94094
GOTERM_MF_DIRECT	GO:0008307~structural constituent of muscle	7	0.0329533	MYL6, OBSCN, KRT19, NEB, SORBS2, TTN, PLEC	2.87092
GOTERM_MF_DIRECT	GO:0019825~oxygen binding	7	0.0530017	ALB, HBG1, HBA1, HBG2, HBE1, HBB, SOD2	2.5655
GOTERM_MF_DIRECT	GO:0016504~peptidase activator activity	6	0.00012806	CAV1, FBLN1, APP, MMP14, PCOLCE, FN1	10.3353
GOTERM_MF_DIRECT	GO:0048407~platelet-derived growth factor binding	6	0.000223565	PDGFRA, COL1A2, PDGFRB, COL6A1, COL2A1, COL1A1	9.39573
GOTERM_MF_DIRECT	GO:0044183~protein binding involved in protein folding	6	0.000836889	CCT2, HSPA1A, HSPA1B, CCT3, CCT6A, CALR	7.38236
GOTERM_MF_DIRECT	GO:0031489~myosin V binding	6	0.00223612	RAB8A, RAB3C, RAB14, RAB11B, RAB11A, RAB10	6.07959
GOTERM_MF_DIRECT	GO:0031683~G-protein beta/gamma-subunit complex binding	6	0.00484662	GNA13, GNAI3, GNAI2, GNAQ, GNA11, GNAS	5.16765
GOTERM_MF_DIRECT	GO:0050840~extracellular matrix binding	6	0.0154224	FBLN2, ITGAV, TGFBI, VTN, DCN, ITGB3	3.97512
GOTERM_MF_DIRECT	GO:0019838~growth factor binding	6	0.0180467	A2M, NRP1, FLT1, ERBB3, SDCBP, KDR	3.82789
GOTERM_MF_DIRECT	GO:0043531~ADP binding	6	0.0399367	CYB5R3, PKM, ACTA1, VCP, ATP1A1, MYH9	3.13191
GOTERM_MF_DIRECT	GO:0001540~beta-amyloid binding	6	0.0446717	APOA1, BCHE, APOE, APBB2, ITM2B, ITM2C	3.0398
GOTERM_MF_DIRECT	GO:0016746~transferase activity, transferring acyl groups	6	0.0731707	CIITA, HGSNAT, DLST, KMT2C, CHAT, CPT1A	2.65008
GOTERM_MF_DIRECT	GO:0005245~voltage-gated calcium channel activity	6	0.0798283	CACNA2D1, ITGAV, RYR1, CACNA1C, CACNA1D, CACNA1S	2.58383
GOTERM_MF_DIRECT	GO:0031072~heat shock protein binding	6	0.094074	HSPA1L, HSP90AB1, HSPA6, HSPA1A, HSPA1B, HSPA8	2.46079
GOTERM_MF_DIRECT	GO:0015631~tubulin binding	6	0.094074	ALDOA, FYN, AGTPBP1, CLIP1, PRNP, MAP7D3	2.46079
GOTERM_MF_DIRECT	GO:0015194~L-serine transmembrane transporter activity	5	0.00111961	SLC1A4, SLC1A5, SERINC5, SERINC1, SLC38A7	9.56973
GOTERM_MF_DIRECT	GO:0005391~sodium:potassium-exchanging ATPase activity	5	0.00178064	ATP1B3, ATP4A, ATP1A1, ATP1A2, ATP12A	8.61276
GOTERM_MF_DIRECT	GO:0004859~phospholipase inhibitor activity	5	0.0026704	ANXA1, ANXA5, ANXA4, ANXA2, ANXA2P2	7.82978
GOTERM_MF_DIRECT	GO:0051010~microtubule plus-end binding	5	0.0026704	CKAP5, CLIP1, CLASP1, DST, APC	7.82978
GOTERM_MF_DIRECT	GO:0005344~oxygen transporter activity	5	0.00704495	HBG1, HBA1, HBG2, HBE1, HBB	6.15197
GOTERM_MF_DIRECT	GO:0005161~platelet-derived growth factor receptor binding	5	0.00917193	ITGA5, PDGFRA, PDGFRB, PDGFD, ITGB3	5.74184
GOTERM_MF_DIRECT	GO:0050750~low-density lipoprotein particle receptor binding	5	0.011677	HSP90B1, APOB, APOE, SNX17, DNAJA1	5.38297
GOTERM_MF_DIRECT	GO:0050431~transforming growth factor beta binding	5	0.011677	VASN, CD36, ITGAV, CD109, ENG	5.38297
GOTERM_MF_DIRECT	GO:0016209~antioxidant activity	5	0.0258668	APOE, ALB, PRDX4, PRDX2, PRDX1	4.30638
GOTERM_MF_DIRECT	GO:0035255~ionotropic glutamate receptor binding	5	0.0305267	FLOT2, RAB4A, FLOT1, GNAS, CANX	4.10131
GOTERM_MF_DIRECT	GO:0017022~myosin binding	5	0.0356489	STX4, ACTC1, ACTA1, RHOA, RALA	3.91489
GOTERM_MF_DIRECT	GO:0035257~nuclear hormone receptor binding	5	0.0356489	ACTN4, NCOA7, NCOR1, TCF7L2, CTNNB1	3.91489
GOTERM_MF_DIRECT	GO:0003756~protein disulfide isomerase activity	5	0.0356489	P4HB, PDIA3, TXNDC5, PDIA6, ITGB3	3.91489
GOTERM_MF_DIRECT	GO:0046961~proton-transporting ATPase activity, rotational mechanism	5	0.0607901	TCIRG1, ATP6V1A, ATP5A1, ATP6V1B2, ATP6V0D1	3.3126
GOTERM_MF_DIRECT	GO:0004177~aminopeptidase activity	5	0.0682237	LNPEP, LAP3, PEPD, ANPEP, NPEPPS	3.18991
GOTERM_MF_DIRECT	GO:0015026~coreceptor activity	5	0.0931536	NRP1, ITGAV, ITGA4, ITGB3, ITGB1	2.87092
GOTERM_MF_DIRECT	GO:0038085~vascular endothelial growth factor binding	4	0.0017801	NRP1, PDGFRA, PDGFRB, KDR	13.7804
GOTERM_MF_DIRECT	GO:0019960~C-X3-C chemokine binding	4	0.0017801	ITGAV, ITGA4, ITGB3, ITGB1	13.7804
GOTERM_MF_DIRECT	GO:0055131~C3HC4-type RING finger domain binding	4	0.00340672	DNAJA1, HSPA1A, HSPA1B, HSPA8	11.4837
GOTERM_MF_DIRECT	GO:1904929~coreceptor activity involved in Wnt signaling pathway, planar cell polarity pathway	4	0.00340672	GPC4, GPC6, PTK7, ROR2	11.4837
GOTERM_MF_DIRECT	GO:0005021~vascular endothelial growth factor-activated receptor activity	4	0.00570554	NRP1, FLT1, PDGFRA, KDR	9.84315
GOTERM_MF_DIRECT	GO:0019001~guanyl nucleotide binding	4	0.0125468	GNAI2, GNAQ, GNA11, GNAS	7.65578
GOTERM_MF_DIRECT	GO:0046790~virion binding	4	0.0171608	HSP90B1, TSG101, PPIA, PTX3	6.8902
GOTERM_MF_DIRECT	GO:0004716~receptor signaling protein tyrosine kinase activity	4	0.0171608	EGFR, ERBB3, KIT, KDR	6.8902
GOTERM_MF_DIRECT	GO:0045295~gamma-catenin binding	4	0.028852	APC2, CTNNA1, TCF7L2, APC	5.74184
GOTERM_MF_DIRECT	GO:0034185~apolipoprotein binding	4	0.0438029	LPA, LRP1, ABCA1, CANX	4.92157
GOTERM_MF_DIRECT	GO:0017127~cholesterol transporter activity	4	0.0524607	APOB, APOA1, APOE, ABCA1	4.59347
GOTERM_MF_DIRECT	GO:0017075~syntaxin-1 binding	4	0.0828261	STXBP1, STXBP2, STXBP3, VAMP2	3.82789
GOTERM_MF_DIRECT	GO:0005539~glycosaminoglycan binding	4	0.0828261	SERPINE2, VCAN, DCN, ENG	3.82789
GOTERM_MF_DIRECT	GO:0043548~phosphatidylinositol 3-kinase binding	4	0.0942943	FYN, AXL, PDGFRB, ATP1A1	3.62642
GOTERM_MF_DIRECT	GO:0042288~MHC class I protein binding	4	0.0942943	TUBB, VCP, ATP5A1, TUBB4B	3.62642
GOTERM_MF_DIRECT	GO:0016620~oxidoreductase activity, acting on the aldehyde or oxo group of donors, NAD or NADP as acceptor	4	0.0942943	GAPDHS, ALDH16A1, GAPDH, ALDH9A1	3.62642
GOTERM_MF_DIRECT	GO:0046977~TAP binding	3	0.00969129	HLA-A, HLA-C, HLA-B	17.2255
GOTERM_MF_DIRECT	GO:0086007~voltage-gated calcium channel activity involved in cardiac muscle cell action potential	3	0.0186384	CACNA2D1, CACNA1C, CACNA1D	12.9191
GOTERM_MF_DIRECT	GO:0032564~dATP binding	3	0.0186384	ST13, HSP90AB1, HSP90AA1	12.9191
GOTERM_MF_DIRECT	GO:0070053~thrombospondin receptor activity	3	0.0186384	CD47, CD36, F2	12.9191
GOTERM_MF_DIRECT	GO:0004459~L-lactate dehydrogenase activity	3	0.0298772	LDHB, LDHA, LDHAL6B	10.3353
GOTERM_MF_DIRECT	GO:0042392~sphingosine-1-phosphate phosphatase activity	3	0.0298772	PLPP1, PLPP3, PLPP2	10.3353
GOTERM_MF_DIRECT	GO:0098639~collagen binding involved in cell-matrix adhesion	3	0.0298772	ITGA11, ITGA2, ITGB1	10.3353
GOTERM_MF_DIRECT	GO:0038132~neuregulin binding	3	0.0298772	ERBB3, ITGAV, ITGB3	10.3353
GOTERM_MF_DIRECT	GO:0008379~thioredoxin peroxidase activity	3	0.0298772	PRDX4, PRDX2, PRDX1	10.3353
GOTERM_MF_DIRECT	GO:0030911~TPR domain binding	3	0.0298772	HSP90AB1, HSP90AA1, RAB8B	10.3353
GOTERM_MF_DIRECT	GO:0030023~extracellular matrix constituent conferring elasticity	3	0.0298772	FBN1, EMILIN2, EMILIN1	10.3353
GOTERM_MF_DIRECT	GO:0071813~lipoprotein particle binding	3	0.0298772	CDH13, CD36, APOE	10.3353
GOTERM_MF_DIRECT	GO:0015186~L-glutamine transmembrane transporter activity	3	0.0298772	SLC1A4, SLC1A5, SLC38A7	10.3353
GOTERM_MF_DIRECT	GO:0051920~peroxiredoxin activity	3	0.0431124	PRDX6, PRDX4, PRDX1	8.61276
GOTERM_MF_DIRECT	GO:0045545~syndecan binding	3	0.0431124	TNC, SDCBP, GPNMB	8.61276
GOTERM_MF_DIRECT	GO:0015180~L-alanine transmembrane transporter activity	3	0.0580752	SLC1A4, SLC36A1, SLC38A7	7.38236
GOTERM_MF_DIRECT	GO:0030235~nitric-oxide synthase regulator activity	3	0.074521	HSP90AB1, EGFR, HSP90AA1	6.45957
GOTERM_MF_DIRECT	GO:0008429~phosphatidylethanolamine binding	3	0.074521	ANXA11, NF1, MFGE8	6.45957
GOTERM_MF_DIRECT	GO:0004579~dolichyl-diphosphooligosaccharide-protein glycotransferase activity	3	0.0922279	RPN1, RPN2, DDOST	5.74184
GOTERM_MF_DIRECT	GO:0005388~calcium-transporting ATPase activity	3	0.0922279	ATP2B1, ATP2B4, ATP2A2	5.74184
GOTERM_MF_DIRECT	GO:0008509~anion transmembrane transporter activity	3	0.0922279	SLC4A7, SLC4A2, ABCA1	5.74184

## Sheet: 数据说明
表头名	释义
Category	注释类别
Term	条目名称
Count	导入DAVID且被识别的组间差异蛋白(Gene)中，匹配到该Term下蛋白数
Gene Symbol	导入DAVID且被识别的组间差异蛋白(Gene)中，匹配到该Term下Gene Symbol
PValue	采用Fisher's exact test(费希尔精确检验)，p<0.05，表示差异蛋白显著富集而非随机匹配到该条目，p越小，表示富集越显著。
Fold Enrichment	表示该条目的富集程度，值越大，富集度越高，一般Fold Enrichment>=1.5认为富集较好。
